# Supplementary material for: International Consensus on Periprosthetic Joint Infection: Description of the Consensus Process
Source: Springer Nature journal article supplement (doi:10.1007/s11999-013-3329-4), 2013-10-23
Supplement: MOESM3 [file 11999_2013_3329_MOESM3_ESM.docx]

**Proceedings of the International Consensus Meeting on Periprosthetic Joint Infection**

Chairmen:

Javad Parvizi MD, FRCS

Thorsten Gehrke MD


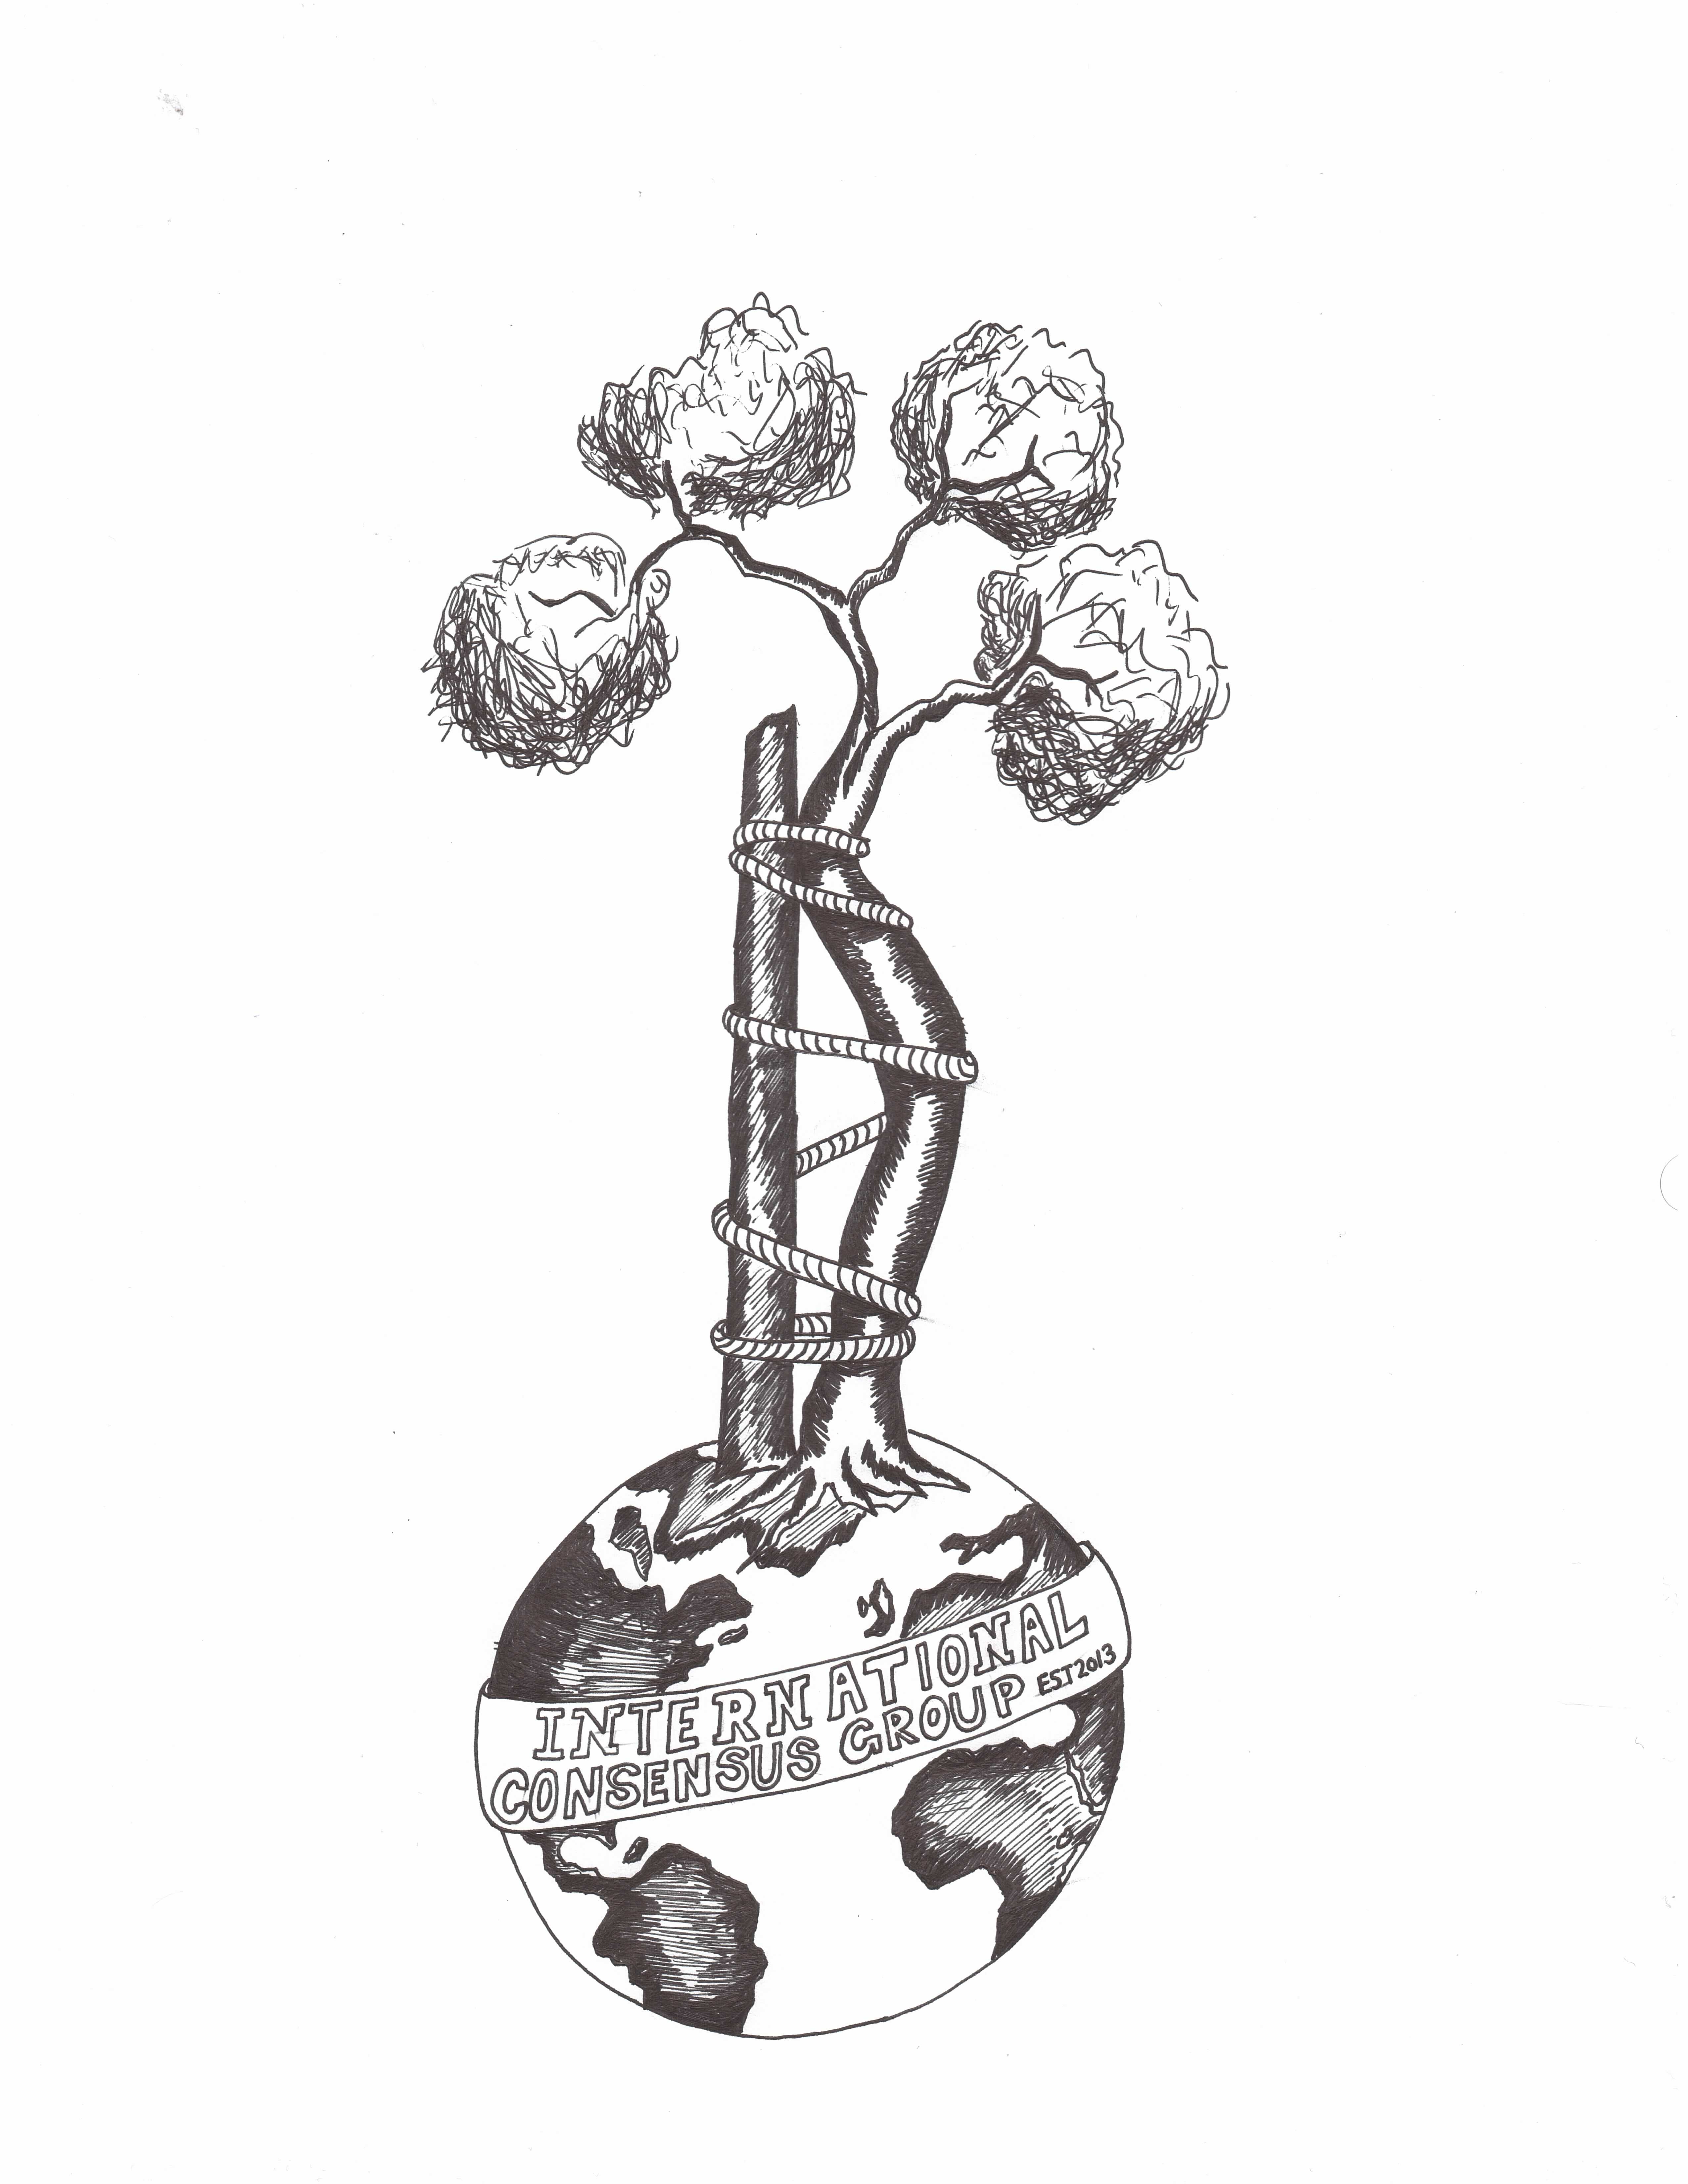


**Foreword**

“The doorstep to the temple of wisdom is a knowledge of our own ignorance.”

Benjamin Franklin

The battle against infection is as old as human civilization. During the last few centuries, great scholars such as Louis Pasteur, Ignaz Philipp Semmelweis, Alexander Fleming, and Joseph Lister have transformed the practice of medicine through their extraordinary discoveries. Despite the progress made and strides gained, our mission to prevent infection following surgery remains unaccomplished. It is not an exaggeration to claim that fear of infection lives in the hearts of every surgeon who steps into the operating room daily.

Periprosthetic joint infection (PJI), with all its disastrous consequences, continues to pose a challenge to the orthopaedic community. Practicing orthopaedic surgeons have invested great efforts to implement strategies that may minimize surgical site infection (SSI). Although high-level evidence may support some of these practices, many are based on little to no scientific foundation. Thus, there is a remarkable variation in practices across the globe for prevention and management of PJI.

The medical community comprehends the importance of high-level evidence and engages in the generation of such whenever possible. The community also recognizes that some aspects of medicine will never lend themselves to the generation of high-level evidence nor should one attempt to do so. It is with the recognition of the latter that The International Consensus Meeting on Periprosthetic Joint Infection was organized. Delegates from various disciplines including orthopaedic surgery, infectious disease, musculoskeletal pathology, microbiology, anesthesiology, dermatology, nuclear medicine, rheumatology, musculoskeletal radiology, veterinary surgery, and pharmacy and numerous scientists with interest in orthopaedic infections came together to evaluate the available evidence, when present, or reach consensus regarding current practices for management of SSI/PJI. The process of generating the consensus has spanned over 10 months. No stone has been left unturned in search of evidence for these questions, with more than 3500 related publications evaluated. The evidence, when available, has been assessed. Otherwise the cumulative wisdom of 400 delegates from 52 countries and more than 160 societies has been amassed to reach consensus about practices that lack higher level of evidence. The leadership of the Musculoskeletal Infection Society (MSIS) and the European Bone and Joint Infection Society (EBJIS), the two societies whose mission is to improve care of patients with musculoskeletal infection, has in particular contributed to this initiative immensely.

The delegates have been engaged every step of the way by communicating through a “social” website generated for this purpose (www.ForMD.com), with more than 25,000 communications exchanged. The consensus document has been developed using the Delphi method under the leadership of Dr. Cats-Baril, a world-renowned expert in consensus development. The design of the consensus process was to include as many stakeholders as possible, allow participation in multiple forums, and provide a comprehensive review of the literature. All relevant topics on PJI were assigned into one of 15 different workgroups as follows: mitigation and education on comorbidities associated with increased SSI/PJI, perioperative skin preparation, perioperative antibiotics, operative environment, blood conservation, prosthesis selection, diagnosis of PJI, wound management, spacers, irrigation and debridement, antibiotic treatment and timing of reimplantation, one-stage versus two-stage exchange arthroplasty, management of fungal or atypical PJI, oral antibiotic therapy, and prevention of late PJI. Every consensus statement has undergone extreme scrutiny, especially by those with expertise in a specific area to ensure that implementation of these practices will lead to improvement of patient care

After synthesizing the literature and assembling a preliminary draft of the consensus statement, more than 300 delegates attended a face-to-face meeting in Philadelphia, PA, USA, and were involved in active discussions and voting on the questions/consensus statements. The delegates first met on July 31, 2013, in smaller workgroups to discuss and resolve any discrepancies and finalize their statements. Then, the delegates met in the general assembly for further discussion of questions and consensus statements. After revision, the finalized consensus statement was assembled and the document was forwarded to the Audience Response System that evening for voting to begin the next day. On August 1, 2013, the delegates came into the general assembly and voted on the 207 questions/consensus statements that were presented. The voting process was conducted using electronic keypads, where one could agree with the consensus statement, disagree, or abstain from voting. The strength of the consensus was judged according to the following scale: (1) simple majority: no consensus (50.1%-59% agreement), (2) majority: weak consensus (60%-65% agreement), (3) supermajority: strong consensus (66%-99% agreement), and (4) unanimous: 100% agreement. Of the 207 questions, there was unanimous vote for one question (controlling OR traffic), 202 questions received supermajority (strong consensus), two questions had weak consensus, and only two questions did not achieve any consensus.

The document presented here is the result of innumerable hours of work by the liaisons, leaders, and delegates dedicated to this historic initiative. The information conveyed in this document is based on evidence, whenever present, or is the result of the cumulative wisdom of more than 400 of the world’s experts in musculoskeletal infection from 52 countries. We are certain that the “best practice guide” set forth by this initiative will serve many of our patients for years to come. It is essential to state that the information contained in this document is merely a guide to practicing physicians who treat patients with musculoskeletal infection and should not be considered as a standard of care. Clinicians should exercise their wisdom and clinical acumen in making decisions related to each individual patient. In some circumstances, this may require implementation of care that differs from what is stated in this document.

On with our fight against infection.

Javad Parvizi MD, FRCS

**Acknowledgments:**

A project of this magnitude is not possible without the assistance and leadership of many. We would like to thank Mitchell Maltenfort PhD, manager of Biostatistics and Bioethics at the Rothman Institute (Philadelphia, PA, USA), who has been a critical player in orchestrating literature review, document development, and the numerous edits that have followed. Tiffany Morrison MS and her team should single-handedly be given most of the credit for their leadership in organization of the meeting, which was no small task. Tiffany and her team worked long hours in the months preceding the meeting to ensure every detail was covered and should be credited for the success of this meeting.

Special thanks to Katherine Huff BA from the Rothman Institute for her invaluable editorial skills and detail-oriented mind that could see the trees in the massive forest and ensured the accuracy of every statement made in this document.

We need to thank Greg Chang and his team from forMD that provided the “social” platform for communication. The numerous interactions and invaluable discussions that took place between delegates would not have been possible without the forMD website. The team should be congratulated for their hard work and extremely responsive attitude that allowed efficient and timely communication among members of the consensus.

Dr. Sandra Berríos-Torres, from the Centers for Disease Control and Prevention, needs a special mention as she has provided us with her expertise and leadership throughout the consensus process and specifically worked with liaisons of some workgroups. She also kindly attended the meeting in person. As a technical expert representing a United States federal agency, Dr. Berríos-Torres did not vote on any of the consensus statements. While we are unable to include her as a delegate in the document, her contributions to this initiative are greatly appreciated.

**With Immense Gratitude to our Sponsors**

A meeting of this magnitude could not take place without the generous support of industry partners whose mission parallels ours in providing better care for patients. We are indebted to every one of our industry partners for their financial support and more critically for their scholarly input throughout the process. We appreciate their input during the literature review and refinement of questions and their agreement not to be part of the voting delegates.

**Platinum Sponsor:**


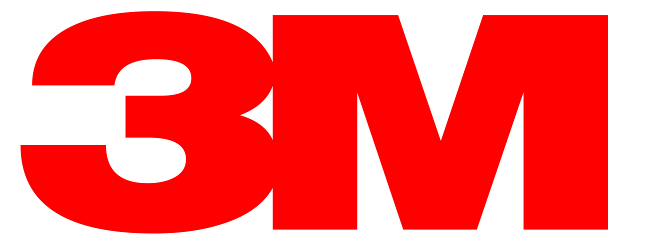


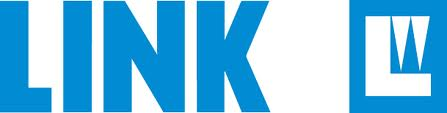


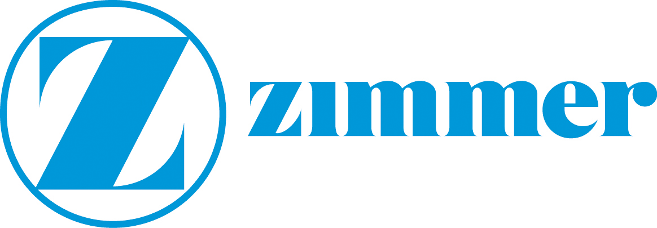


**Silver Sponsor:**


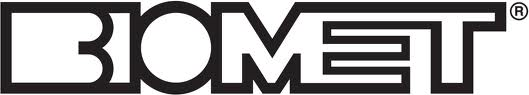


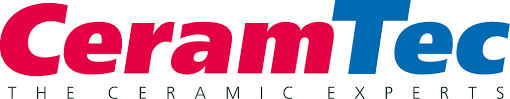


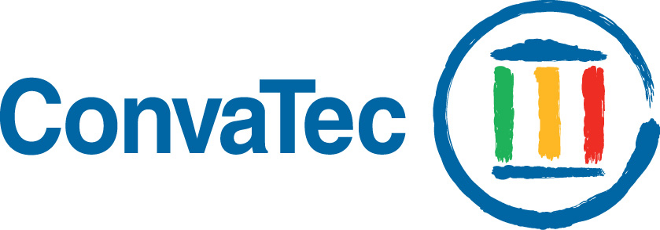


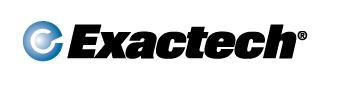


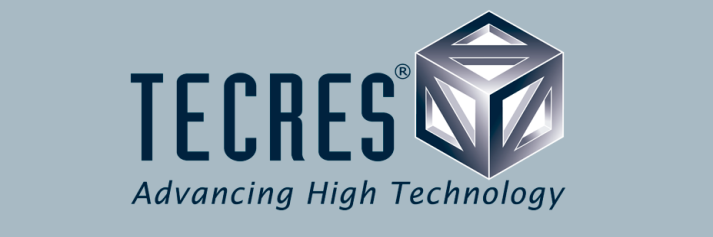


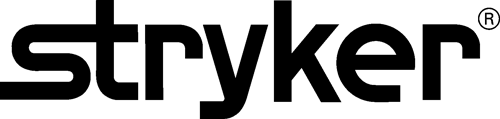


**Bronze Sponsor:**

| **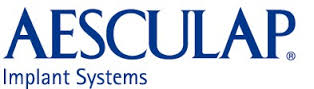** | | [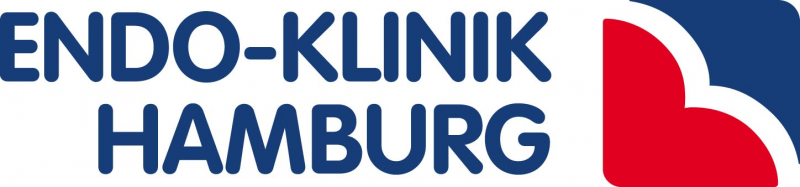](http://www.google.com/url?sa=i&rct=j&q=endo-klinik+hamburg&source=images&cd=&cad=rja&docid=eVGnSp7wmqbbTM&tbnid=DsGDiJxH4m7yYM:&ved=0CAUQjRw&url=http://weisse-liste.krankenhaus.aok.de/detailansicht.5420.de.html?wlkh%5bview%5d=peq&wlkh%5bsearch_tab%5d=indication&wlkh%5bselected_fid%5d=&wlkh%5bindication%5d=S72&wlkh%5boinput%5d=Knochenbruch+des+Oberschenkels&wlkh%5bradius%5d=&wlkh%5blocation%5d=39106+Magdeburg+(Alte+Neustadt)&wlkh%5bpath%5d=5414&wlkh%5bfid%5d=3399&ei=l4X2UeTNJbW34AOY5YDwAg&bvm=bv.49784469,d.dmg&psig=AFQjCNHw_dfgKTjlCCQV4alM_N5DZf5K4g&ust=1375196847561657) | |
| --- | --- | --- | --- |
| 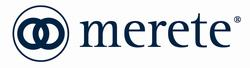 | | | |
| 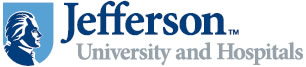 | | 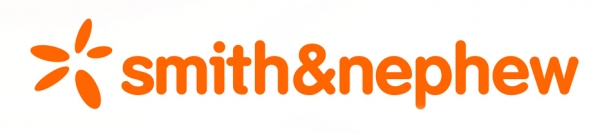 | |
| **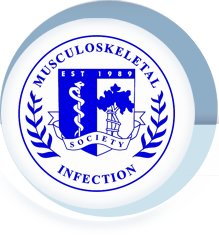** | | **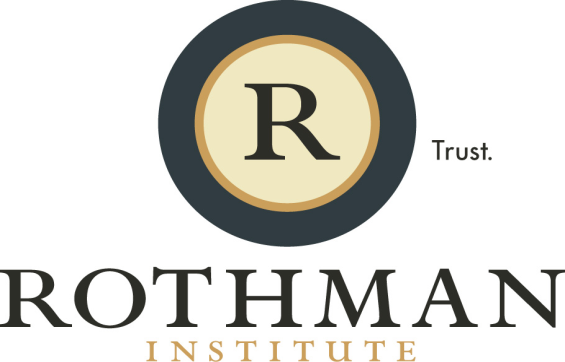** | |
|  | |  |

**Sponsor:**

| 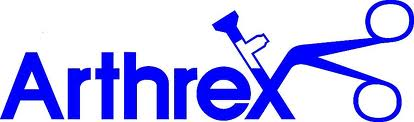 | 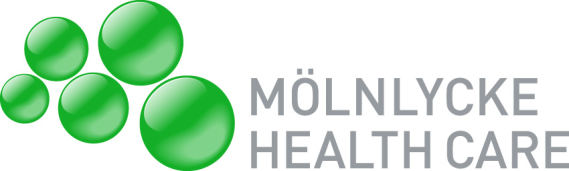 |
| --- | --- |
| 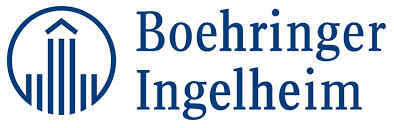 | 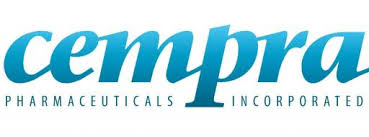 |
| 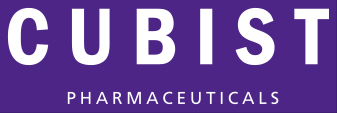 | 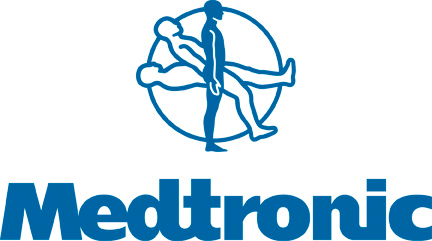 |
|  | **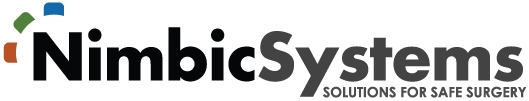** |

**EXECUTIVE SUMMARY**

Periprosthetic joint infection (PJI), with its disastrous implications, continues to challenge the orthopaedic community. Practicing orthopaedic surgeons continue to invest efforts to minimize surgical site infection (SSI). Although high-level evidence may support some of these practices, many are based on little to no scientific foundation. This results in wide variation across the globe for prevention and management of PJI. To address this, The International Consensus Meeting on Periprosthetic Joint Infection was organized. Delegates from disciplines including orthopaedic surgery, infectious disease, and many others participated. The process of generating the consensus has spanned 10 months. More than 3500 relevant publications were evaluated by 400 delegates from 52 countries and numerous societies.

This consensus document has been developed using the Delphi method under the leadership of Dr. Cats-Baril. The consensus process was designed to include many participants, allow participation in multiple forums, and provide a comprehensive review of the literature. Covered topics included the following: mitigation and education on comorbidities associated with increased SSI/PJI, perioperative skin preparation, perioperative antibiotics, operative environment, blood conservation, prosthesis selection, diagnosis of PJI, wound management, spacers, irrigation and debridement, antibiotic treatment and timing of reimplantation, one-stage versus two-stage exchange arthroplasty, management of fungal or atypical PJI, oral antibiotic therapy, and prevention of late PJI. Every consensus statement has undergone careful scrutiny by both subject matter experts and generalists to ensure that its implementation will indeed lead to improvement of care for patients. Based on this process, the following consensus statements were developed.

**TABLE OF CONTENTS**

| **Section** | **Page** |
| --- | --- |
| Foreword | 8 |
| Sponsors | 11 |
| Societies Represented | 15 |
| Nations Represented | 17 |
| **Workgroup 1: Mitigation and Education**  **Liaisons:**  Vinay K Aggarwal MD, Eric H Tischler BA  **Leaders:**  Charles Lautenbach MD, Gerald R Williams Jr MD  **Delegates:**  Joseph A Abboud MD, Mark Altena MD, Thomas Bradbury MD, Jason Calhoun MD, FACS, Douglas Dennis MD, [Daniel J Del Gaizo MD](http://www.med.unc.edu/ortho/faculty/delgaizo), Lluís Font-Vizcarra MD, Kaisa Huotari MD, Stephen Kates MD, Kyung-Hoi Koo PhD, Tad M Mabry MD, Calin Stefan Moucha MD, Julio Cesar Palacio MD, Trisha Nicole Peel MBBS, Rudolf W Poolman MD, PhD, William J Robb III MD, Ralph Salvagno MD, Thorsten Seyler MD, Gabor Skaliczki MD, Edward M Vasarhelyi MD, William Charles Watters III MD | 21 |
| **Workgroup 2: Perioperative Skin Preparation**  **Liaison:**  Anthony T Tokarski BS  **Leaders:**  David Blaha MD (US), Michael A Mont MD (US), Parag Sancheti MS, DNB, MCh (International)  **Delegates:**  Lyssette Cardona MD, MPH, MHA, AAHIVS, FIDSA, Gilberto Lara Cotacio MD, Mark Froimson MD, Bhaveen Kapadia MD, James Kuderna MD, PhD, Juan Carlos López MD, Wadih Y Matar MD, MSc, FRCSC, Joseph McCarthy MD, Rhidian Morgan-Jones MB BCh, FRCS, Michael Patzakis MD, Ran Schwarzkopf MD, Gholam Hossain Shahcheraghi MD, Xifu Shang MD, Petri Virolainen MD, PhD, Montri D Wongworawat MD, Adolph Yates Jr MD | 42 |
| **Workgroup 3: Perioperative Antibiotics**  **Liaison:**  Erik Hansen MD  **Leaders:**  Katherine Belden MD, Randi Silibovsky MD (US), Markus Vogt MD (International)  **Delegates:**  William Arnold MD, PhD, Goran Bicanic MD, PhD, Stefano Bini MD, Fabio Catani MD, Jiying Chen MD, PhD, Mohammad Ghazavi MD, FRCSC, Karine M Godefroy MD, Paul Holham MD, Hamid Hosseinzadeh MD, Kang II Kim MD, PhD, Klaus Kirketerp-Møller MD, Lars Lidgren MD PhD, Jian Hao Lin MD, Jess H Lonner MD, Christopher C Moore MD, Panayiotis Papagelopoulos MD, Lazaros Poultsides MD MSc PhD, R Lor Randall MD, Brian Roslund PharmD, Khalid Saleh MD MSC FRCSC MHCM, Julia V Salmon MD, Edward Schwarz PhD, Jose Stuyck MD, Annette W Dahl MD, Koji Yamada MD | 52 |
| **Workgroup 4: Operative Environment**  **Liaisons:**  Pouya Alijanipour MD, Joseph Karam MD  **Leaders:**  Adolfo Llinás MD (International), Kelly G Vince MD (International), Charalampos Zalavras MD (US)  **Delegates:**  Matthew Austin MD, Grant Garrigues MD, Snir Heller MD, James Huddleston MD, Brian Klatt MD, Viktor Krebs MD, Christoph Lohmann MD, Edward J McPherson MD, Robert Molloy MD, Ali Oliashirazi MD, Mitchell Schwaber MD, Eoin Sheehan MD, Eric Smith MD, Robert Sterling MD, Gregory Stocks MD, Shrinand Vaidya MD | 114 |
| **Workgroup 5: Blood Conservation**  **Liaison:**  Mohammad R Rasouli MD  **Leaders:**  Luiz Sérgio Marcelino Gomes MD, PhD (International), Brian Parsley MD (US)  **Delegates:**  Wael Barsoum MD, Hari Bezwada MD, James Cashman MD, Julio Garcia MD, William Hamilton MD, Eric Hume MD, Rajesh Malhotra MD, Stavros Memtsoudis MD, PhD, Alvin Ong MD, Fabio Orozco MD, Douglas Padgett MD, Ricardo Reina MD, Marco Teloken MD, Emmanuel Thienpont MD, Jonathan H Waters MD | 161 |
| **Workgroup 6: Prosthesis Selection**  **Liaison:**  Claudio Diaz-Ledezma MD  **Leaders:**  Javad Parvizi MD, FRCS (US), Yixin Zhou MD (International)  **Delegates:**  Valentin Antoci MD, Paul Ducheyne PhD, Andrew Freiberg MD, Gustavo Garcia Rangel MD, Seung Beom Han MD, Noreen Hickok PhD, Carlos Higuera MD, Constantinos Ketonis MD, Feza Korkusuz MD, Jacek Kruczynski MD, Francisco Macule MD, Jacek Markuszewski MD, Oliver Marín-Peña MD, Dinesh Nathwani MD, Phillip Noble PhD, Kevin Ong PhD, Nelson Ono MD, Mohammad Sadegh Parvizi PhD, Zachary Post MD, Salvador Rivero-Boschert MD, Thomas Schaer VMD, Irving Shapiro DDS, PhD | 181 |
| **Workgroup 7: Diagnosis of Periprosthetic Joint Infection**  **Liaison:**  Benjamin Zmistowski BS  **Leaders:**  Craig Della Valle MD (US), Thomas W Bauer MD (US), Konstantinos N Malizos MD, PhD (International)  **Delegates:**  Abbas Alavi MD, Hani Bedair MD, Robert E Booth MD, Peter Choong MD, Carl Deirmengian MD, Garth D Ehrlich PhD, Anil Gambir MD, Ronald Huang MD, Yair Kissin MD, Hideo Kobayashi MD, Naomi Kobayashi MD, Veit Krenn MD, Drago Lorenzo MD, SB Marston MD, Geert Meermans MD, Javier Perez MD, JJ Ploegmakers MD, Aaron Rosenberg MD, C Simpfendorfer MD, Peter Thomas MD, Stephan Tohtz MD, Jorge A Villafuerte MD, Peter Wahl MD, Frank-Christiaan Wagenaar MD, Eivind Witzo MD | 200 |
| **Workgroup 8: Wound Management**  **Liaison:**  Elie Ghanem MD  **Leaders:**  Volkmar Heppert MD (International), Mark Spangehl MD, FRCSC (US)  **Delegates:**  John Abraham MD, Khalid Azzam MD, Lowry Barnes MD, Federico Jose Burgo MD, Walid Ebeid MD, Nitin Goyal MD, Ernesto Guerra MD, Kirby Hitt MD, Sofiene Kallel MD, Gregg Klein MD, Yona Kosashvili MD, Brett Levine MD, Laura Matsen MD, Michael J Morris MD, James J Purtill MD, Chitranjan Ranawat MD, FRCS, FRCSC, Peter F Sharkey MD, Rafael Sierra MD, Anna Stefansdottir MD, PhD | 221 |
| **Workgroup 9: Spacers**  **Liaison:**  Mustafa Citak MD  **Leaders:**  Jean-Noel Argenson MD (International), Bas Masri MD, FRCSC (International), Daniel Kendoff MD (International), Bryan Springer MD (US)  **Delegates:**  Volker Alt MD, Andrea Baldini MD, Quanjun Cui MD, Gregory K Deirmengian MD, Hernan del Sel MD, Michael F Harrer MD, Craig Israelite MD, David Jahoda MD, Paul C Jutte MD, Eric Levicoff MD, Enzo Meani MD, Fernando Motta MD, Orestes Ronaldo Pena MD, Amar S Ranawat MD, Oleg Safir MD, Matthew W Squire MD, Michael J Taunton MD, Charles Vogely MD, Samuel S Wellman MD | 248 |
| **Workgroup 10: Irrigation and Debridement**  **Liaison:**  Carl Haasper MD, PhD, MSc  **Leaders:**  Martin Buttaro MD (International), William Hozack MD (US)  **Delegates:**  Craig A Aboltins MD, Olivier Borens MD, JJ Callaghan MD, Pedro Ivo de Carvalho MD, Yuhan Chang MD, Pablo Corona MD, Ferdinando Da Rin MD, Silvano Esposito MD, Thomas K Fehring MD, Xavier Flores Sanchez MD, Gwo-Chin Lee MD, JC Martinez-Pastor MD, SM Javad Mortazavi MD, Nicolas O Noiseux MD, Kuo-Ti Peng MD, Harold Delano Schutte MD, Daniel Schweitzer MD, Rihard Trebše MD, Eleftherios Tsiridis MD, Leo Whiteside MD | 269 |
| **Workgroup 11: Antibiotic Treatment and Timing of Reimplantation**  **Liaison:**  Camilo Restrepo MD  **Leaders:**  Steven Schmitt MD (US), David Backstein MD (International)  **Delegates:**  Bryan T Alexander PharmD, Maja Babic MD, Barry D Brause MD, John L Esterhai MD, Robert P Good MD, Peter H Jørgensen MD, Paul Lee MB, BCh, FRCS, Camelia Marculescu MD, Claudio Mella MD, Carsten Perka MD, Aidin Eslam Pour MD, Harry E Rubash MD, Tomoyuki Saito MD, Rolando Suarez MD, Robert Townsend MD, I Remzi Tözün MD, Michel PJ Van den Bekerom MD | 283 |
| **Workgroup 12: One-stage vs Two-stage Exchange**  **Liaison:**  Paul Lichstein MD, MS  **Leaders:**  Thorsten Gehrke MD (International), Adolph Lombardi MD, FACS (US), Carlo Romano MD (International), Ian Stockley MB, ChB, MD, FRCS (International)  **Delegates:**  George Babis MD, Jerzy Bialecki MD, László Bucsi MD, Xu Cai MD, Li Cao MD, Brian de Beaubien MD, Johannes Erhardt MD, Stuart Goodman MD, PhD, FRCSC, FACS, FBSE, William Jiranek MD, Peter Keogh, David Lewallen MD, MS, Paul Manner MD, Wojciech Marczynski MD, J Bohannon Mason MD, Kevin Mulhall MB, MCh, FRCSI, Wayne Paprosky MD, Preetesh Patel MD, Francisco Piccaluga MD, Gregory Polkowski MD, Luis Pulido MD, Ian Stockley MBBS, ChB, FRCS, Juan Suarez MD, Fritz Thorey MD, Rashid Tikhilov MD, Job Diego Velazquez MD, Heinz Winkler MD | 294 |
| **Workgroup 13: Management of Fungal or Atypical Periprosthetic Joint Infections**  **Liaison:**  Matthias Gebauer MD  **Leaders:**  Lars Frommelt (International)  **Delegates:**  Pramod Achan MBBS, Tim N Board MD, Janet Conway MD, William Griffin MD, Nima Heidari MBBS, Glenn Kerr MD, Alex McLaren MD, Sandra Bliss Nelson MD, Marc Nijhof MD, Akos Zahar MD | 308 |
| **Workgroup 14: Oral Antibiotic Therapy**  **Liaison:**  Patrick O’Toole MD  **Leaders:**  Douglas Osmon MD (US), Alex Soriano DO (International)  **Delegates:**  Erik Berdal MD, Mathias Bostrum, Rafael Franco-Cendejas MD, DeYoung Huang PhD, Charles Nelson, F Nishisaka, Brian Roslund, Cassandra D Salgado, Robert Sawyer MD, John Segreti MD, Eric Senneville PhD, Xian Long Zhang | 318 |
| **Workgroup 15: Prevention of Late PJI**  **Liaison:**  Antonia Chen MD, MBA  **Leaders:**  Fares Haddad MB, ChB, FRCS (International), Paul Lachiewicz MD (US)  **Delegates:**  Michael Bolognesi MD, Luis E Cortes MD, Alejandro Gonzalez Della Valle MD, Massimo Franceschini MD, Jiri Gallo MD, Aaron Glynn MD, Alejandro Gonzalez Della Valle MD, Aydin Gahramanov MD, Monti Khatod MD, Stergios Lazarinis MD, PhD, Guenther Lob MD, Arvind Nana MD, Peter Ochsner MD, Ibrahim Tuncay MD, Tobias Winkler MD, YiRong Zeng MD | 330 |
| **Future Research** | 360 |

**Societies Represented**

American Association of Hip and Knee Surgeons (AAHKS)

American Academy of Orthopaedic Surgeons (AAOS)

American Association of Tissue Banks AATB

American College of Rheumatology (ACR)
American College of Surgeons (ACS)

American Orthopaedic Association (AOA)

American Shoulder and Elbow Surgeons (ASES)

American Society of Bone and Mineral Research (ASBMR)

American Society of Anesthesiologists (ASA)

American Society of Regional Anesthesia (ASRA)

AO Trauma Clinical Priority Program on Bone Infection

Association Research Circulation Osseuse (ARCO)

Asia Pacific Arthroplasty Association (APAS)

Asia Pacific Knee Society (APKS)

Asia Pacific Orthopaedic Association (APOA)

Asociación Argentina de Ortopedia y Traumatología (AAOT)

Associação Brasileira para o Estudo de Implantes Osteoarticulares (AsBIO)

Association for Study and Application of Methods of Ilizarov (ASAMI)

Association of Bone and Joint Surgeons (ABJS)

Association of Orthopaedic and Trauma surgeons of Russian Federation (AOTRF)

Association of periOperative Registered Nurses (AORN)

Association of Surgeons of Great Britain and Ireland (ASGBI)

Australian Knee Society (AusKS)

Australian Orthopaedic Association (AOA)

Azerbaijan Association of Orthopaedics and Traumatology

Belgian Knee Society (BelKS)

Belgian Orthopaedic and Trauma Society (BVOT)

Brazilian Hip Society (SBQ)

Brazilian Knee Society (BKS)

British Association for Surgery of the Knee (BASK)

British Hip Society (BHS)

British Orthopaedic Association (BOA)

Bulgarian Orthopaedic Association (BulOrtho)

Bulgarian Orthopedics and Traumatology Association (BOTA)

Canadian Orthopaedic Association (COA)

Czech Society for Orthopaedics and Traumatology (CSOT)

Chinese Orthopaedic Association (COA)

Colegio Mexicano De Ortopedia y Traumatología (CMO)

Combined Services Orthopaedic Society (CSOS)

Croatian Orthopaedic and Traumatology Association (COTA)

Dansk Ortopaedisk Selskab (DOS)

Dutch Orthopaedic Association (NOV)

Eastern Orthopaedic Association (EOA)

Egyptian Orthopaedic Association (EOA)

European Bone and Joint Infection Society (EBJIS)

European Federation of National Associations of Orthopaedic Sports Traumatology (EFOST)

European Federation of National Associations of Orthopaedics and Traumatology (EFORT)

European Hip Society (EHS)

European Knee Associates (EKA)

European Society for Surgery of Shoulder and Elbow (ESSSE)

European Society of Biomaterials (ESB)

Finnish Orthopaedic Association (FOA)

German Society for Orthopaedic and Trauma Surgery (DGOU)

German Society of Pathology (DGP)

Grupo de Estudio de la PatologíaSéptica del AparatoLocomotor (GEPSAL)

Gruppo Italiano per lo Studio e il Trattamento delle Infezioni Osteoarticolari (GISTIO)

Hellenic Association of Orthopaedic Surgery and Traumatology (HAOST)

Hungarian Orthopaedic Association (HOA)

Indian Orthopaedic Association (IOACON)

Indian Society of Hip and knee Surgeons (ISHKS)

Indonesian Orthopaedic AssociationIndoOA

Infectious Diseases Society of America (IDSA)

Institution of Mechanical Engineers (IMechE)

International Congress of Joint Reconstruction (ICJR)

International Geriatric Fracture Society

International Society for Technology in Arthroplasty (ISTA)

International Society of Arthroscopy, Knee Surgery and Orthopaedic Sports Medicine (ISAKOS)

International Society of Orthopaedic Surgery and Traumatology (SICOT)

Iranian Orthopaedic Association (IranOA)

Irish Orthopaedic Association (IOA)

Israel Ministry of Health, National Center for Infection Control

Israeli Orthopaedic Association (IOA)

Japanese Orthopaedic Association (JOA)

Korean Hip Society (KHS)

Korean Knee Society (KKS)

Korean Orthopaedic Association (KOA)

Mid American Orthopaedic Association (MOA)

Musculoskeletal Infection Society (MSIS)

Musculoskeletal Tumour Society (MSTS)

New Zealand Orthopaedic Association (NZOA)

Nordic Orthopaedic Federation (NORF)

Norwegian Orthopaedic Association (NOA)

Orthopaedic Research Society (ORS)

Österreichische Gesellschaft für Orthopädie und orthopädische Chirurgie (ÖGO)

Pan Arab Orthopaedic Association (PAOA)

Peruvian Society of Orthopaedics and Traumatology (PSOT)
Phillippine Orthopaedic Association (PhilOrtho)

Polish Society of Orthopaedics and Traumatology (PSOT)

Rheumatoid Arthritis Surgical Society (RASS)

Romanian Orthopaedic Association (SOROT)

Russian Orthopaedic Society (ROS)

Singapore Orthopaedic Association (SOA)

Sociedade Brasiliera de Ortopedia e Traumatologia (SBOT)

SocietatCatalana de CirugíaOrtopédica I Traumatología (SCCOT)

Sociedad Chilena de Ortopedia y Traumatología (SCHOT)

Sociedad Colombiana de Cirugía Ortopédica y Traumatología (SCCOT)

Sociedad Española de Fijación Externa y Cirugia Reconstructivam (SEFEx)

Sociedad Latinoamericana De Artroscopía Rodilla Y Traumatología Deportiva (SLARD)

Sociedad Venezolana de Cirugía Ortopédica y Traumatología (SVCOT)

Società Italiana di Ortopedia e Traumatologia (SIOT)

Société Française de Chirurgie Orthopédique et Traumatologique (SOFCOT)

South African Knee Society (SAKS)

South African Orthopaedic Association (SAOA)

Southern Orthopaedic Association (SouthOA)

Spanish Orthopaedic Society (SECOT)

Spanish Knee Society (SKS)

Swedish Orthopaedic Association (SOF)

Swiss Orthopaedic and Trauma Association (SGOT/SSOT)

Taiwanese Orthopaedic Association (TaiOA)

The Hip Society (HS)

The International Hip Society (IHS)

The Knee Society (AKS)

Turkish Orthopaedic Association (TOTBID)

Washington State Orthopaedic Association (WSOS)

Weckebach Instituut (WI)

Western Orthopaedic Association (WestOA)

World Orthopaedic Concern (WOC)


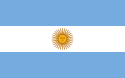
**Argentina**

Burgo, Fedrico Jose

Buttaro, Martin

Del Sel, Hernan

Gonzalez Della Valle, Alejandro

Piccaluga, Francisco


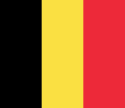

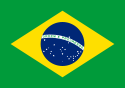


**Belgium**

Stuyck, Jose

Thienpont, Emmanuel


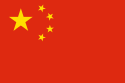


**China**

Cai, Xu

Chen, Jiying

Fei, Jun

Huang, Deyong

Lin, Jianhao

Shang, Xifu

Zeng, Yirong

Zhang, Xian Long

Zhou, Yixin


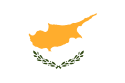


**Cyprus**

Ketonis, Constantinos


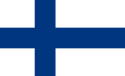


**Finland**

Huotari, Kasia

Virolainen, Petri


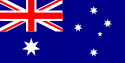
**Australia**

Aboltins, Craig

Choong, Peter

Peel, Trisha

**
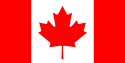
**

**Brazil**

Carvalho, Pedro Ivo

Gomes, Luiz Sérgio Marcelino

Ono, Nelson Keiske

Teloken, Marco

**
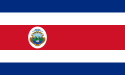

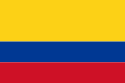
**

**Colombia**

Cortes, Luis Emilio

Garcia, Julio Cesar

Higuera, Carlos

Lara, Gilberto

Llinás, Adolfo

Palacio, Julio Cesar

Perez, Javier

Restrepo, Camilo

**
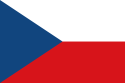
Czech Republic**

Gallo, Jiri

Jahoda, David

**
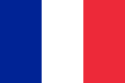
**

**France**

Argenson, Jean-Noel

Godefroy, Karine M.

Senneville, Eric

**
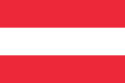
Austria**

Winkler, Heinz

**Canada**

Backenstein, David

Masri, Bas

Mater, Wadih

Safir, Oleg

Vasarhelyi, Edward

**Costa Rica**

Villafuerte, Jorge A


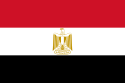

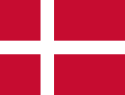


**Denmark**

Kirketerpp-Møller, Klaus

Jørgensen, Peter H


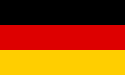


**Germany**

Alt, Volker

Citak, Mustafa

Frommelt, Lars

Gebauer Matthias

Gehrke, Thorsten

Haasper, Carl

Heppert, Volkmar

Kendoff, Daniel


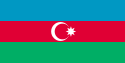


**Azerbaijan**

Gahramanov, Aydin


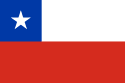


**Chile**

Diaz-Ledezma, Claudio

Mella, Claudio

Schweitzer, Daniel

**
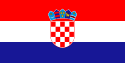
**

**Croatia**

Bicanic, Goran

**Egypt**

Ebeid, Walid

Krenn, Veit

Lob, Guenter

Lohmann, Christoph

H

Perka, Carsten

Thomas, Peter

Thorey, Fritz

Tohtz, Stephan

Winkler, Tobias

Zahar, Akos


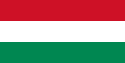

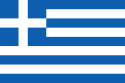


**Greece**

Babis, George

Malizos, Konstantinos

Papagelopoulos, Panayiotis

Tsiridis, Eleftherios


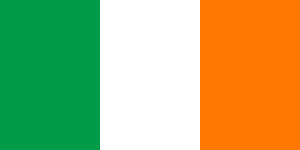


**Ireland**

Cashman, James

Glynn, Aaron

Keogh, Peter

Mulhall, Kevin

O’Toole, Patrick

Sheehan, Eoin


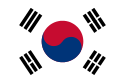

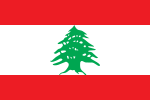


**Republic of Korea**

Han, Seung-Beom

Kim, Kang-Il

Koo, Kyung-Hoi

**
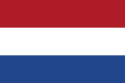
**

**Netherlands**

Altena, Mark

Jutte, Paul C

Meermans, Geert

Nijhof, Marc W

Ploegmakers, Joris JW

Poolman, Rudolf W

Van den Bekerom, Michel

Vogely, Charles

Wagenaar, Frank-Christiaan


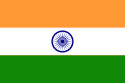


**Hungary**

Bucsi, László

Skaliczki, Gabor


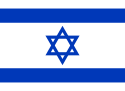


**Israel**

Heller, Snir

Kosashvill, Yona

Schwaber, Mitchell

**Lebanon**

Bitar, Diana

Ghanem, Elie

Karam, Joseph

Raphael, Ibrahim


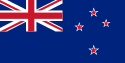


**New Zealand**

Vince, Kelly George

**India**

Malhotra, Rajesh

Sancheti, Parag

Vaidya, Shrinand


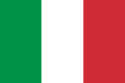


**Italy**

Baldini, Andrea

Catani, Fabio

Da Rin de Lorenzo, Ferdinando

Drago, Lorenzo

Esposito, Silvano

Francheschini, Massimo

Logoluso, Nicola

Meani, Enzo

Romano, Carlo

Traverso, Francesco


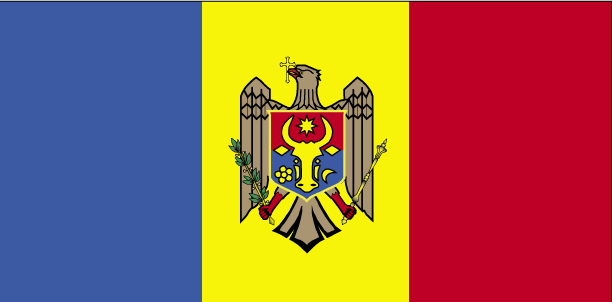


**Moldova**

Antoci, Valentin


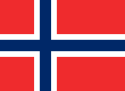


**Norway**

Berdal, Erik

Witzø, Eivind


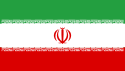


**Iran**

Alijanipour, Pouya

Eslampour, Aidin

Ghazavi, Mohammad Taghi

Hosseinzadeth, Hamidreza

Mortazavi, Javad

Rasouli, Mohammad

Shahcheragh, G Hossain


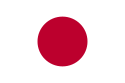


**Japan**

Kobayashi, Hideo

Kobayashi, Naomi

Saito, Tomoyuki

Yamada, Koji


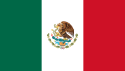


**Mexico**

Franco-Cendejas, Rafael

Rivero-Boshert, Salvador

Velazquez, Diego


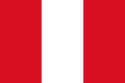


**Peru**

Pena, Orestes Rolando

Suárez, Rolando


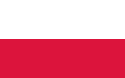
**Poland**

Bialecki, Jerzy

Kruczynski, Jacek

Marczynski, Wojciech

Markuszeweski, Jacek


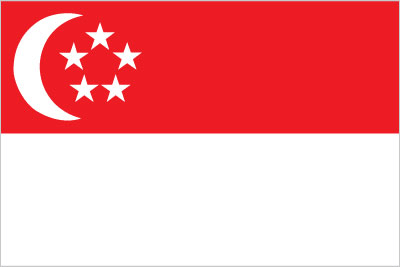


**Singapore**

Lee, Paul


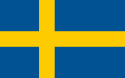


**Sweden**

Dahl, Annette W

Lazarinis, Stergios

Lidgren, Lars

Stefánsdótir, Anna


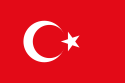


**Turkey**

Korkusuz, Feza

Tözün, Ismail Remzi

Tuncay, Ibrahim


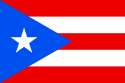

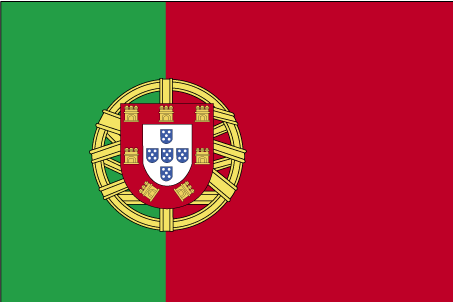


**Portugal**

Sousa, Ricardo

**
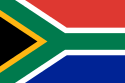
**
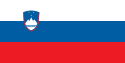


**Slovenia**

Trebše, Rihard


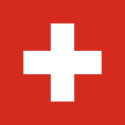


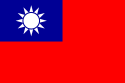


**Switzerland**

Borens, Olivier

Erhardt, Johannes B

Ochsner, Peter

Vogt, Markus

Wahl, Pete


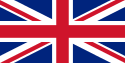


**United Kingdom**

Achan, Pramod

Board, Tim N

Gambir, Anil

Haddad, Fares

Heidari, Nima

Lee, Paul

Morgan-Jones, Rhidian

Nathwani, Dinesh

Parvizi, Sadegh

Stockley, Ian

Townsend, Robert

**Puerto Rico**

López, Juan Carlos

Suarez, Juan

**
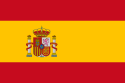
**

**South Africa**

Lautenbach, Charles


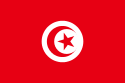


**Taiwan**

Chang, Yuhan

Peng, Kuo-Ti


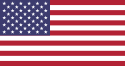


**United States of America**

Abboud, Joseph A

Abraham, John A

Aggarwal, Vinay K

Alavi, Abass

Alexander, Bryan T

Arnold, William V

Austin, Matthew

Azzam, Khalid

Babic, Maja

Barnes, Lowry

Barsoum, Wael

Bauer, Tom

Bedair, Hany

Belden, Katherine

Bezwada, Hari P

Bini, Stefano A

Blaha, J David

Bolognesi, Michael P

Booth, Robert E


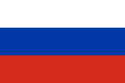
**Russian Federation**

Tikhilov, Rashid

**Spain**

Corona, Pablo

Flores Sanchez, Xavier

Font-Vizcarra, Luís

Guerra, Ernesto

Macule, Francisco

Marín-Peña, Oliver

Martinez-Pastor, J Carlos

Soriano, Alex

**Tunisia**

Kallel, Sofiene

Bostrum, Matthias

Bradbury, Thomas L

Brause, Barry D

Calhoun, Jason H

Cardona, Lyssette

Callaghan, John

Chen, Antonia

Conway, Janet

Cui, Quanjun

de Beaubien, Brian C

Deirmengian, Carl

Deirmengian, Greg

Del Gazio, Daniel

Della Valle, Alejandro

Della Valle, Craig

Dennis, Douglas

Ducheyne, Paul

Esterhai, John

Ehrlich, Garth D

Fehring, Thomas K

Freiberg, Andrew A

Froimson, Mark

Garrigues, Grant

Good, Robert P

Goodman, Stuart

Goyal, Nitin

Griffin, William

Hamilton, William

Hansen, Erik

Harrer, Michael F

Hickok, Noreen

Hitt, Kirby D

Holtom, Paul

Hozack, William James

Huang, Ronald

Huddleston, James

Hume, Eric

Israelite, Craig

Jiraneck, William

Kappadia, Bhaveen

Kates, Stephen L

Kerr, Glenn J

Khatod, Monti

Kim, Raymond

Klatt, Brian A

Klein, Gregg

Krebs, Viktor


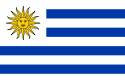


**Uruguay**

Motta, Fernando

Molloy, Robert

Mont, Michael A

Moore, Christopher C

Morris, Michael J

Moucha, Calin Stefan

Nana, Arvind D

Nelson, Charles L

Nelson, Sandra

Noiseux, Nicolas O

O’Donnell, Richard

Oliashirazi, Ali

Ong, Alvin

Ong, Kevin

Orozco, Fabio

Osman, Douglas R

Padgett, Douglas E

Paprosky, Wayne G

Patel, Preetesh

Patzakis, Michael J

Polkowski, Michael G

Post, Zachary

Parsley, Brian

Parvizi, Javad

Poultsides, Lazaros

Pulido, Luis

Purtill, James J

Ranatat, Chitranjan S

Ranawat, Amar S

Randall, R Lor

Reina, Ricardo J


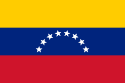


**Venezuela**

Garcia Rangel, Gustavo

Ries, Michael

Robb, William

Ross, David A

Rosenberg, Aaron

Roslund, Brian

Rubash, Harry E

Saleh, Khaled J

Salgado, Cassandra

Salmon, Julia V

Salvagno, Ralph

Sawyer, Robert G

Schaer, Thomas P

Schmitt, Steven K

Schutte Jr, Harold D

Schwarz, Edward M

Schwarzkopf, Ran

Scuderi, Gil

Segreti, John

Sharkey, Peter

Silibovsky, Randi

Seyler, Thorsten

Shapiro, Irving

Simpfendorfer, Claus

Smith, Eric

Spangehl, Mark

Sperling, John W

Springer, Bryan D

Squire, Matthew

Sterling, Robert

Stocks, Greg

Taunton, Michael

Tokarski, Anthony T

Tischler, Eric H

Waters, Jonathan

Watters III, William C

Wellman, Samuel

Whiteside, Leo

Williams, Gerald R

Wongworawat, Montri D

Yates, Adolph J

Zalavras, Charalampos

Zmistowski, Benjamin

**Workgroup 1: Mitigation and Education**

**Liaisons:**

Vinay K Aggarwal MD, Eric H Tischler BA

**Leaders:**

Charles Lautenbach MD, Gerald R Williams Jr MD

**Delegates:**

Joseph A Abboud MD, Mark Altena MD, Thomas Bradbury MD, Jason Calhoun MD, FACS, Douglas Dennis MD, [Daniel J Del Gaizo MD](http://www.med.unc.edu/ortho/faculty/delgaizo), Lluís Font-Vizcarra MD, Kaisa Huotari MD, Stephen Kates MD, Kyung-Hoi Koo PhD, Tad M Mabry MD, Calin Stefan Moucha MD, Julio Cesar Palacio MD, Trisha Nicole Peel MBBS, Rudolf W Poolman MD, PhD, William J Robb III MD, Ralph Salvagno MD, Thorsten Seyler MD, Gabor Skaliczki MD, Edward M Vasarhelyi MD, William Charles Watters III MD

**Question** **1A: What are the significant risk factors for development of surgical site infection (SSI) or periprosthetic joint infection (PJI) after elective total joint arthroplasty (TJA)?**

**Consensus**: Active infection of the arthritic joint (septic arthritis), presence of septicemia, and/or presence of active local cutaneous, subcutaneous, or deep tissue infection are all significant risk factors predisposing patients to SSI or PJI and are contraindication to undertaking elective TJA.

**Delegate Vote:** Agree: 99%, Disagree: 0%, Abstain: 1% (Strong Consensus)

**Question 1B: What are the potential risk factors for development of SSI or PJI after elective TJA?**

**Consensus:** The risk factors for SSI or PJI include history of previous surgery, poorly controlled diabetes mellitus (glucose > 200 mg/L or hemoglobin A1C [HbA1C] > 7%), malnutrition, morbid obesity (body mass index [BMI] > 40 kg/m2), active liver disease, chronic renal disease, excessive smoking (> one pack per day), excessive alcohol consumption (> 40 units per week), intravenous drug abuse, recent hospitalization, extended stay in a rehabilitation facility, male sex, diagnosis of posttraumatic arthritis, inflammatory arthropathy, prior surgical procedure in the affected joint, and severe immunodeficiency.

**Delegate Vote:** Agree: 94%, Disagree: 4%, Abstain: 2% (Strong Consensus)

**Justification:**

Active Infection of Joint, Bloodstream, or Local Tissue

The presence of active infection in an arthritic joint has been shown to lead to significantly higher rates of PJI after TJA.1,2 There are also a number of longitudinal studies and case reports that indicate that the presence of active systemic or local tissue infection may result in hematogenous or direct seeding of the implant following TJA.3-9 Thus, elective arthroplasty should be delayed in patients with active infection until they are adequately treated and infections are confirmed to be eradicated.

History of Previous Surgery

The local wound environment may be compromised in patients who have undergone previous operative procedures, which may contribute to the development of an SSI or PJI following TJA.10 Peersman et al. matched infected and noninfected patients who underwent total knee arthroplasty (TKA) and reported that a history of prior open surgical procedures was a significant risk factor (p < 0.0001) for developing PJI following TKA.11 Although not much literature has been presented correlating history of prior surgery and development of PJI, we recommend that a patient’s previous surgical history be documented, along with proper evaluation of the local wound environment. An appropriate infection workup, as discussed elsewhere in this document, should be undertaken in all patients who have had previous surgery at the site of an upcoming arthroplasty. This will allow for any necessary modification of the operative approach and technique to minimize risk of developing infection.10

Uncontrolled Hyperglycemia

Numerous studies and meta-analyses indicate that preoperative uncontrolled glucose levels (fasting glucose > 180 mg/dL or 10 mmol/L) are associated with increased postoperative complications and adverse outcomes.12-14 Although less work has been dedicated to the investigation of postoperative glucose control in the arthroplasty literature, there is a suggestion from general surgery that early postoperative hyperglycemia results in a higher rate of SSI.15 Therefore, efforts should be made to maintain adequately controlled glucose levels during the entire perioperative time period. Less work has been definitive in elucidating the role of HbA1C in predicting joint infection.16,17 While the optimal HbA1C level at which TJA risks become excessive has not been established, we recommend attempts to preoperatively optimize diabetic control and would carefully consider offering elective arthroplasty to patients in whom the fasting glucose level is > 200 mg/dL (10 mmol/L) and HbA1C > 7%.

Further research is needed to evaluate whether patients who are to undergo elective orthopaedic surgery should have routine screening for diabetes and hyperglycemia, as has been done for patients who are to have cardiothoracic surgery.

Malnutrition

Malnutrition has been shown to result in a number of adverse outcomes following TJA, including poor wound healing, longer hospital length of stay, longer anesthesia and surgical time, and persistent wound drainage with increased susceptibility to infections.18-21 Studies have reported on the various preoperative tests that may be used to screen patients for malnutrition.18,21,22 Measures of malnutrition have varied and include transferrin, total lymphocyte count, total albumin, and prealbumin. Currently, parameters to evaluate nutritional status include serum albumin (normal 3.5-5.0 g/dL), serum transferrin (normal 204-360 mg/dL), serum prealbumin (normal 15-35 mg/dL), and total serum lymphocyte count (800-2000/mm3). Due to the correlation between nutritional status and postoperative recovery, patients suspected of having malnutrition should have their nutritional status checked prior to elective arthroplasty.23 While the optimal method for correction of malnutrition preoperatively is unknown, options to do so include administration of high protein supplements, vitamin and mineral supplementation,24 increased consumption of calories, early mobilization, and physiotherapy.22

Morbid Obesity

Recent data from the 2010 Centers for Disease Control and Prevention (CDC) indicate that > one-third of Americans, or > 60 million adults aged 20 years or older, are classified as obese (BMI ≥ 30.0 kg/m2).25 A number of studies have demonstrated that patients with obesity are at increased risk of poor wound healing and PJI.26-29 The reason for this increased risk may be related to an increase in operative time, greater need for allogenic blood transfusion, and the presence of other comorbidities, including diabetes.27,29-31 The decision to perform elective arthroplasty in morbidly obese patients with BMI ≥ 40.0 kg/m2, should be weighed only after careful consideration of the increased risk of complications including infection. The risk-benefit must be carefully considered and appropriate informed consent/informed choice is paramount as postoperative complications are higher in this patient group.32 It is important to add that obese patients undergoing surgical procedures are at increased risk of underdosed prophylactic antibiotics33 and the dose of antibiotic should be accordingly adjusted, as discussed elsewhere in this document.

Smoking

Smoking is associated with postoperative morbidity and mortality.34 A meta-analysis of six randomized trials found that discontinuing smoking prior to surgery led to a decreased risk of total postoperative complications (relative risk [RR] = 0.76, 95% confidence interval [CI] = 0.69-0.84).35 The same meta-analysis also pooled data from 15 observational studies and found that smoking cessation led to fewer wound healing complications (RR = 0.73, CI = 0.61-0.87).35 Singh et al. found that current smokers undergoing TJA were more likely to have SSI, whereas prior smokers were not associated with as high a risk for developing wound infection.34 Longer periods of smoking cessation prior to surgery have been found to be associated with lower rates of postoperative complications.35-38 Furthermore, in a study of patients undergoing primary total hip arthroplasty (THA), postoperative complications were significantly higher for those who were heavy tobacco users (> one pack per day or 25 cigarettes).39 In the preoperative period, it is important to evaluate for tobacco use and offer strategies to quit smoking to reduce postoperative wound complications and lower the risk for SSI and PJI. Studies from orthopaedic and nonorthopaedic fields suggest that smoking intervention programs, even when instituted 4 to 6 weeks prior to elective surgery, may diminish the risk of infectious and wound-healing complications.40

Alcohol Consumption

Patients who consume alcohol on a frequent basis may have a significantly increased risk for postoperative complications after arthroplasty.41 Using the Alcohol Use Disorders Identification Test-Consumption questionnaire on 9176 male United States veterans who underwent major noncardiac surgery, Bradley et al. determined that the incidence of SSI and other postoperative infections was significantly associated with excessive alcohol use.42 The optimal period of cessation of alcohol consumption is unknown for arthroplasty patients, but at least 4 weeks of abstinence may be necessary to reverse physiologic abnormalities that place patients at increased risk of postoperative morbidity.43 The preoperative period serves as an opportunity to identify patients who abuse alcohol. Although the benefit of directed alcohol cessation programs before surgery is not well established in the literature, it is reasonable to expect patients to reduce alcohol consumption prior to surgery (for nondependent patients) and to delay elective arthroplasty in alcoholic patients until the issue has been addressed.

Active Renal Disease

Few studies have explored the complications associated with active renal disease in TJA patients. Sunday et al. reported on the complications of TJA in patients with end-stage renal disease on hemodialysis. The authors determined that primary and revision surgeries in this specific cohort were associated with a high rate of complications and death; 29% of patients died from in-hospital complications and two patients had overwhelming sepsis (14.5%).44 These data were supported by Lieberman et al., who also reported a high rate of complications (81%), including a deep infection rate of 19% in patients with chronic renal failure.45 Sakalkale et al. found that patients with end-stage renal failure had a high mortality and complication rate of 58%, with a deep infection rate of 13%.46 Overall the risk of developing postoperative infection after TJA is significantly higher in patients with chronic renal failure, especially in those on hemodialysis.

Active Liver Disease

Several studies explored TJA in patients with either active symptomatic or asymptomatic liver disease. In a matched study of patients undergoing TJA, Pour et al. found that compared to a control group, patients with asymptomatic hepatitis C had a higher rate of surgical complications, including more wound complications.47 While the underlying mechanism for increased complications is unknown, even patients with asymptomatic hepatitis should be made aware of the potential for higher rates of complications after elective TJA. Hsieh et al. determined that in patients with advanced cirrhosis undergoing TJA, there was a higher rate of complications and especially infectious failures, with a prosthesis survival of 77.8% after 5 years.48 On the other hand, Cohen et al. reported that even in cirrhotic patients, elective TJA could be safely performed with no increase in adverse outcomes.49 Thus far, routine testing for liver disease preoperatively in patients undergoing elective TJA with no prior history or signs on examination has not been proven to be beneficial.

Immunosuppression

While an association between immunosuppression and an increased incidence of SSI is debated, many surgeons believe that patients with immunosuppression are at an increased risk of PJI. Examples of immunosuppressive agents include glucocorticoids such as prednisone, cytostatics including cyclophosphamide and methotrexate, drugs that act on immunophilins such as tacrolimus, and others agents such as interferons and tumor necrosis factor (TNF)-α inhibiting agents. Berbari et al. created a risk stratification model for SSI and PJI and determined that immunosuppression was a significant risk factor (hazard ratio = 1.96, 95% CI = 1.37-2.82) for PJI.50 In addition, Peersman et al. found that immunosuppressive therapy was a significant predisposing factor for SSI.11 In patients who have undergone organ transplantation, and in particular liver transplant, several studies have reported an increased risk for osteoporotic fractures and osteonecrosis with concurrent immunosuppressive therapy.51,52 However, immunosuppression and simultaneous poor bone quality has led to conflicting opinions surrounding the actual risk for postoperative infection.53 Part of the difficulty in assessing the risk of immunosuppression on PJI is the current variability in defining immunosuppression. Further work will be needed to delineate the true impact of immunosuppression on the development of SSI or PJI in patients undergoing elective arthroplasty.

Intravenous Drug Abuse

Patients with previous history of intravenous drug abuse (IVDA) and patients with painful joint arthrosis present a difficult treatment decision. Lehman et al. determined the rate of deep PJI in patients with human immunodeficiency virus (HIV) or IVDA after TJA. Twenty-nine patients with HIV or a history of IVDA or both underwent TJA. Of 28 HIV-positive patients undergoing TJA, four (14%) developed infections. Two of 8 joint arthroplasties (25%) in the IVDA group developed an infection. Two of five joint arthroplasties (40%) with both IVDA and HIV developed a deep infection.54 These findings were supported by Habermann et al., who reported a septic postoperative complication rate of 28.6% among patients who had a history of intravenous drug abuse.55 Further work will be needed to determine the direct effects of intravenous drug abuse on the development of SSI or PJI. This workgroup is of the opinion that patients with active IVDA should not be offered elective joint arthroplasty.

Human Immunodeficiency Virus Infection

Recent drug therapies have dramatically improved the life expectancy of HIV-positive patients. HIV-positive patients demonstrate a widely varying progression to AIDS as reflected by the varying rate of decline in CD4 cell counts. Patients with CD4 counts of > 400 cells/mL and with undetectable viral loads may be appropriate candidates for elective TJA, as the risk of subsequent SSI may be decreased. Habermann et al. reported no difference in functional outcome following TJA between patients with or without HIV.55 Furthermore, Hicks et al. reported that while rates of deep joint sepsis after primary TJA in HIV-positive patients (18.7%) are higher than in normal populations, long-term survival with marked symptom relief is a reasonable expectation for a large proportion of HIV-positive patients following TJA.56 It is our recommendation that in patients with HIV, orthopaedic surgeons work closely with infectious disease specialists in monitoring CD4 counts and viral loads and that decisions to undertake TJA be made on an individual basis.

Hospital Admission or Extended Rehabilitation Stay

Lee et al. reviewed 169 SSIs in elderly patients who had undergone orthopaedic surgery and compared them to 171 matched controls. Admission from a healthcare facility was independently associated with a greater risk of infection (odds ratio = 4.35; 95% CI = 1.64–11.11).57

Other Risk Factors

It appears that based on numerous studies, male patients are more likely to develop SSI/PJI. In addition, preoperative diagnosis of posttraumatic arthritis with or without prior surgery has also been found to be a risk factor for PJI.58-60

**Disclaimer:** Although elective arthroplasty needs to be withheld for some patients at extreme risk of SSI/PJI, there is inadequate evidence in the literature as to what the exact threshold for making this decision should be. The disability imposed by the degenerative disease needs to be weighed against the potential for development of PJI. Some authorities have attempted to provide a mathematical model that may improve our decision making for subjecting a patient to elective arthroplasty. Dr. Charles Lautenbach has created a scoring system that takes into consideration pain and loss of function and factors predisposing to morbidity and mortality to generate a score that allows surgeons to objectively determine the justification for surgery, even in the face of high risk of morbidity and mortality. A description of the Lautenbach Estimate of the Indication and Contra-indication for Arthroplasty score can be found at [www.boneinfection.co.za](http://www.boneinfection.co.za).

**Question 2: What is the role of oral hygiene for patients undergoing an elective arthroplasty?**

**Consensus:** All patients undergoing elective arthroplasty should be screened for evidence of active infection. This may be performed by administration of a questionnaire or dental examination.

**Delegate Vote:** Agree: 80%, Disagree: 18%, Abstain: 2% (Strong Consensus)

**Justification:** It has been well established that hematogenous seeding from a remote source of infection can lead to PJI, even years after TJA. Several sources, including data from the CDC National Health and Nutrition Examination Survey, have brought to light the relatively high prevalence of periodontal disease, especially in the elderly.61 Dental infections can serve as a potentially dangerous harbor of bacteria and some studies show these bacteria to be microbiologically indistinguishable from pathogens found at sites of PJI.62 Nonetheless, there is much debate regarding the use of active preoperative screening and treatment of dental pathology to ensure adequate oral hygiene and prevent postoperative bacteremia or PJI in all patients undergoing TJA.

One study by Barrington et al. determined that in 100 consecutive TJA patients, preoperative dental clearance revealed a 23% incidence of dental pathology, yet no patients in their cohort went on to develop a SSI or PJI.63 Several authors have noted that only a small percentage of joint infections can be accurately attributed to dental pathogens or procedures. Laporte et al. retrospectively reviewed 2973 patients, and of 52 patients with late infections, only 3 were strongly associated with a dental procedure.64 The incidence of late hematogenous infection in TJA has been quoted as between < 0.01% and 0.6% with organisms from a dental source involved in between 0.04% and 0.07%.65

Currently, there are no official recommendations from the American Academy of Orthopaedic Surgeons regarding dental clearance prior to TJA to prevent PJI.66 However, excluding evidence of ongoing oral sepsis or severely poor hygiene, there is little justification for routinely screening and treating all patients for dental abnormalities. Nevertheless, signs and symptoms of active dental infection should be sought prior to subjecting a patient to elective arthroplasty.

A recent prospective study by Tokarski et al. found that administration of a short questionnaire to patients could identify risk factors for active dental disease.60 In their study, risk factors for failed dental clearance or active dental disease included tobacco use, poor flossing habits, history of one or more tooth extractions, older age, narcotic use, and lack of a dentist visit within 12 months prior to taking the survey. The study found that patients who had four of the six identified risk factors had a fourfold increased incidence of failing dental clearance. Based on their study, it appears that selective dental clearance based on patient risk stratification may be a reasonable approach.

**Question 3A: What should the process be for methicillin-resistant *Staphylococcus aureus* (MRSA) and methicillin-sensitive *Staphylococcus aureus* (MSSA) screening?**

**Consensus:** While this workgroup does NOT recommend universal screening and decolonization of all patients undergoing joint arthroplasty, it accepts that preoperative screening for *Staphylococcus aureus* (MSSA and MRSA) and decolonization decreases the rate of SSI and the incidence of staphylococcal and nonstaphylococcal infections.

**Delegate Vote:** Agree: 85%, Disagree: 11%, Abstain: 4% (Strong Consensus)

**Question 3B: What should the treatment regimen be for MRSA and MSSA decolonization?**

**Consensus:** Short-term nasal application of mupirocin is the most accepted current method of decolonization for MRSA and/or MSSA.

**Delegate Vote:** Agree: 80%, Disagree: 11%, Abstain: 9% (Strong Consensus)

**Justification:** Extensive literature consistently documents that the carriage of *Staphylococcus aureus* in patients’ anterior nares may be an important reservoir for bacteria and can serve as a potential source of hospital-acquired and postsurgical infections.67 Nasal colonization rates of *S. aureus* have been extensively studied in patients, hospital staff, and the general population.68,69 Kalmeijer et al. determined that high-level nasal carriage of *S. aureus* was the most important and only significant independent risk factor for developing SSI with *S. aureus.*70 Many prospective studies and systematic reviews done in the orthopaedic and general surgery population indicate that the number of SSIs with *S. aureus* can be reduced through rapid screening and decolonization of nasal carriers of *S. aureus* on admission.71,72 Skin decolonization prior to surgery has long been the subject of much debate, with a variety of methods proposed for the eradication process. Mupirocin nasal ointment has been widely accepted for reducing nasal carriage loads for MRSA, yet long-term use of this agent has been shown to lead to development of bacterial resistance.67,73,74 Other methods of decolonization include photodisinfection therapy, total body chlorhexidine gluconate showers and wipes preoperatively, and iodine-based solutions applied hours before surgery. Chlorhexidine gluconate wipes (2%) eliminate the need to bathe just before surgery and have started to gain popularity and prominence in the orthopaedic literature.75

**Question 4: Should healthcare workers be screened for MRSA and MSSA?**

**Consensus:** No. Routine MRSA and MSSA screening is not warranted for healthcare workers. MRSA/MSSA screening should be reserved for workers with symptoms associated with bacterial infections.

**Delegate Vote:** Agree: 82%, Disagree: 15%, Abstain: 3% (Strong Consensus)

**Justification:** There is ongoing controversy regarding the role of healthcare workers in the transmission of MRSA. Symptomatic MRSA infections among healthcare workers have been described.76-78 Controversy exists as to the true benefit of screening all healthcare workers. The Dutch Working Party for Infection recommends screening healthcare workers after exposure to MRSA-positive patients; however, German and North American79-81 specialist associations are against such screening. Opponents of MRSA screening indicate a risk of stigmatization of those affected, potential exposure to toxic decolonization procedures, and high costs associated with such screening.82 Therefore selective, rather than universal, screening of symptomatic healthcare workers is advised.83

**Question 5: What is the role of routine urine screening in patients undergoing an elective arthroplasty?**

**Consensus:** Routine urine screening is NOT warranted for patients undergoing elective arthroplasty. Urine screening prior to elective arthroplasty should be reserved for patients with a present history or symptoms of a urinary tract infection (UTI).

**Delegate Vote:** Agree: 74%, Disagree: 24%, Abstain: 2% (Strong Consensus)

**Justification:** UTIs have the potential to cause bacteremia and postsurgical wound infections, particularly in patients receiving an elective arthroplasty. Patients with a positive urinalysis and/or urine culture are generally treated with antibiotics prior to elective surgery. However, it is unclear whether a positive preoperative urinalysis and culture with subsequent antibiotic treatment influences the incidence of postsurgical infection. One study in the arthroplasty literature found no significant association between perioperative UTI and deep infection after arthroplasty.84 Another study found that patients with asymptomatic UTI detected by positive urinalysis and urine culture had an increased risk of wound infection postoperatively, despite treatment.85 A cost-effectiveness analysis estimated that with routine urine screening, 4.58 wound infections in nonprosthetic knee operations may be prevented annually, but that it would come at a cost of USD 1,500,000 per wound infection prevented.86 Currently, there are no cost-effectiveness analyses or official treatment guidelines from organizations such as the Infectious Diseases Society of America regarding routine urine screening and antibiotic treatment for all patients undergoing TJA.87,88 Still, it is reasonable to reserve such a preoperative workup for only those patients with a known history of recurrent urinary infection or for those with evidence of ongoing urinary symptoms suspicious for infection.

**Question 6: Should disease-modifying agents be stopped prior to elective TJA?**

**Consensus:** Yes. Disease-modifying agents should be stopped prior to elective TJA. The timing of drug discontinuation should be based on the specific medication and the individual patient. The cessation of immunosuppressant medications should be performed in consultation and under the direction of the treating physician.

**Delegate Vote:** Agree: 92%, Disagree: 5%, Abstain: 3% (Strong Consensus)

**Justification:** According to a large review of patients in a Medicare database, patients with rheumatoid disease (RA) have been found to be at higher risk of PJI.89 The infection rate among RA patients undergoing TKA is 1.6 times greater than in patients undergoing the same procedure for osteoarthritis.90 Patients with RA may have a higher risk of infection due to immunosuppressive therapy including corticosteroids such as prednisone and disease-modifying antirheumatic drugs (DMARDs) such as methotrexate.91,92 High doses of corticosteroids and TNF-α blocker therapy within 1 year of surgery were shown to increase the risk of subsequent infection.93,94 Two studies, one of which was a prospective, randomized controlled trial, failed to show a difference in wound complications and infection rates among TJA patients who continued versus those who discontinued methotrexate prior to their surgery.95,96On the other hand, two other studies, one of which was a prospective nonrandomized study, showed an increased rate of SSI and PJI in patients who continued their disease-modifying agents prior to TJA.94,97 We recommend that the management of DMARDs should be based on the drug half-life (Table 1). The Canadian Rheumatology Association recommended that these drugs should be stopped prior to surgery for as long as three to five times the half-life of each individual drug that may last from 0 days to 3 months.98 It is important to note that corticosteroids should not be abruptly stopped due to the risk of inducing cortisol deficiency from hypothalamic-pituitary-adrenal axis suppression. The cessation of immunosuppressant medications should be performed in consultation and under the direction of the treating physician.

**Table 1.** Half-lives of medications

| **Medication** | **Half-life*** | **Recommendation** |
| --- | --- | --- |
| Nonsteroidal Antiinflammatory Drugs (NSAIDs) | 2-17 hours | Discontinue therapy within 1 week prior to surgery |
| Methotrexate | 0.7-5.8 hours | Discontinue therapy within 1 week prior to surgery  Continue therapy 2 weeks after surgery  (Patients with renal dysfunction, hold 2 weeks prior to surgery) |
| Sulfasalazine  Azathioprine | 5 hours  7.6 hours | Discontinue therapy prior to 1 week before surgery |
| Leflunomide | ~2 weeks | Hold for 6 weeks prior to surgery |
| Hydroxychloroquine | 1-2 months | Continue therapy up to and including the day of surgery |
| **Biological Response Modifiers**  Etanercept  Infliximab  Golimumab  Tocilizumab  Abatacept  Adalimumab  Certolizumab  Rituximab | 4.3 days  8-10 days  12-14 days  21 days | Hold for at least 1.5 weeks prior to surgery  Hold for 3 weeks prior to surgery  Hold for 1 month prior to surgery  Hold for 2 months prior to surgery |
| **Gout Agents**  Allopurinol  Colchicine  Probenecid | 1-2 hours  26-32 hours  26-32 hours | Discontinue therapy within 1 week prior to surgery |

**Question 7: In patients with prior septic arthritis, what strategies should be undertaken to minimize the risk of subsequent PJI?**

**Consensus: ALL** patients with prior septic arthritis should undergo evaluation by serology and aspiration of the joint whenever possible, prior to arthroplasty.

**Delegate Vote:** Agree: 84%, Disagree: 14%, Abstain: 2% (Strong Consensus)

**Consensus:** While the optimal timing for performing elective arthroplasty in a patient with prior septic arthroplasty needs further research, surgeons should ensure that no evidence of active infection exists by taking **intraoperative cultures**.

**Delegate Vote:** Agree: 85%, Disagree: 14%, Abstain: 1% (Strong Consensus)

**Consensus:** During arthroplasty, if cement is utilized, antibiotics should be added.

**Delegate Vote:** Agree: 90%, Disagree: 5%, Abstain: 5% (Strong Consensus)

**Consensus:** If intraoperative cultures are found to be positive, extended intravenous antibiotics should be appropriately administered with input from infectious disease specialists.

**Delegate Vote:** Agree: 93%, Disagree: 5%, Abstain: 2% (Strong Consensus)

**Justification**: Septic arthritis can lead to accelerated destruction of the articular cartilage and result in end-stage arthritis. Staphylococci most commonly cause bacterial infection of the joint, with *S. aureus* shown to be the primary infecting pathogen in several case series from the United Kingdom, France, and Australia.99-101 Inflammatory markers such as erythrocyte sedimentation rate (ESR) and C-reactive protein (CRP) are commonly measured in the evaluation of patients with septic arthritis.102-104 The role of these markers in evaluating the eradication status of infection in patients with prior septic arthritis remains unknown. In some patients with previous septic arthritis, these serological markers were found to be normal. Thus, most patients with prior septic arthritis should undergo joint aspiration prior to elective arthroplasty. The samples should be sent for culture, white cell count, and neutrophil differential. Some authorities also measure the glucose level, procalcitonin level, and other parameters to determine if infection exists. The threshold level for any of the aforementioned parameters for diagnosis of persistent infection in these patients is not known, but based on the arthroplasty literature a cell count > 3000 cells/µL and a neutrophil differential > 80% may be indicative of active infection.105,106 During elective arthroplasty, multiple samples for culture (three to five) should also be taken.106,107 If cement is being utilized, the surgeon should consider adding antibiotic with appropriate spectrum of activity to cover previously isolated pathogens. The dose of antibiotics added should be kept low to avoid weakening the mechanical strength of the cement. Patients with positive cultures should be treated with an appropriate antibiotic for an extended period of time following elective arthroplasty**.** Patients in whom synovial fluid analysis reveals elevated neutrophil percentage and/or white cell counts should have the cultures maintained for a prolonged period of time following surgery in the hope of isolating a possible infecting organism. Consideration should also be given for the use of molecular techniques (polymerase chain reaction or molecular marker measurements) in these patients.

**References:**

1. Cherney DL, Amstutz HC. Total hip replacement in the previously septic hip. J Bone Joint Surg Am. 1983;65(9):1256-1265.

2. Jupiter JB, Karchmer AW, Lowell JD, Harris WH. Total hip arthroplasty in the treatment of adult hips with current or quiescent sepsis. J Bone Joint Surg Am. 1981;63(2):194-200.

3. Cruess RL, Bickel WS, vonKessler KL. Infections in total hips secondary to a primary source elsewhere. Clin Orthop Relat Res. 1975;(106):99-101.

4. del Sel HJ, Charnley J. Total hip replacement following infection in the opposite hip. Clin Orthop Relat Res. 1979;(141):138-142.

5. Fitzgerald RH Jr, Nolan DR, Ilstrup DM, Van Scoy RE, Washington JA 2nd, Coventry MB. Deep wound sepsis following total hip arthroplasty. J Bone Joint Surg Am. 1977;59(7):847-855.

6. Hanssen AD, Rand JA. Evaluation and treatment of infection at the site of a total hip or knee arthroplasty. Instr Course Lect. 1999;48:111-122.

7. Schmalzried TP, Amstutz HC, Au MK, Dorey FJ. Etiology of deep sepsis in total hip arthroplasty. The significance of hematogenous and recurrent infections. Clin Orthop Relat Res. 1992;(280):200-207.

8. Stinchfield FE, Bigliani LU, Neu HC, Goss TP, Foster CR. Late hematogenous infection of total joint replacement. J Bone Joint Surg Am. 1980;62(8):1345-1350.

9. Thomas BJ, Moreland JR, Amstutz HC. Infection after total joint arthroplasty from distal extremity sepsis. Clin Orthop Relat Res. 1983;(181):121-125.

10. Hanssen AD, Osmon DR, Nelson CL. Prevention of deep periprosthetic joint infection. Instr Course Lect. 1997;46:555-567.

11. Peersman G, Laskin R, Davis J, Peterson M. Infection in total knee replacement: a retrospective review of 6489 total knee replacements. Clin Orthop Relat Res. 2001;(392):15-23.

12. American Diabetes Association. Standards of medical care in diabetes--2013. Diabetes Care. 2013;36(Suppl 1):S11-66.

13. Jamsen E, Nevalainen P, Kalliovalkama J, Moilanen T. Preoperative hyperglycemia predicts infected total knee replacement. Eur J Intern Med. 2010;21(3):196-201.

14. Marchant MH Jr, Viens NA, Cook C, Vail TP, Bolognesi MP. The impact of glycemic control and diabetes mellitus on perioperative outcomes after total joint arthroplasty. J Bone Joint Surg Am. 2009;91(7):1621-1629.

15. Pomposelli JJ, Baxter JK 3rd, Babineau TJ, et al. Early postoperative glucose control predicts nosocomial infection rate in diabetic patients. JPEN J Parenter Enteral Nutr. 1998;22(2):77-81.

16. Adams AL, Paxton EW, Wang JQ, et al. Surgical outcomes of total knee replacement according to diabetes status and glycemic control, 2001 to 2009. J Bone Joint Surg Am. 20 2013;95(6):481-487.

17. Iorio R, Williams KM, Marcantonio AJ, Specht LM, Tilzey JF, Healy WL. Diabetes mellitus, hemoglobin A1C, and the incidence of total joint arthroplasty infection. J Arthroplasty. 2012;27(5):726-729 e721.

18. Del Savio GC, Zelicof SB, Wexler LM, et al. Preoperative nutritional status and outcome of elective total hip replacement. Clin Orthop Relat Res. 1996;(326):153-161.

19. Gherini S, Vaughn BK, Lombardi AV Jr, Mallory TH. Delayed wound healing and nutritional deficiencies after total hip arthroplasty. Clin Orthop Relat Res. 1993;(293):188-195.

20. Jaberi FM, Parvizi J, Haytmanek CT, Joshi A, Purtill J. Procrastination of wound drainage and malnutrition affect the outcome of joint arthroplasty. Clin Orthop Relat Res. 2008;466(6):1368-1371.

21. Lavernia CJ, Sierra RJ, Baerga L. Nutritional parameters and short term outcome in arthroplasty. J Am Coll Nutr. 1999;18(3):274-278.

22. Nicholson JA, Dowrick AS, Liew SM. Nutritional status and short-term outcome of hip arthroplasty. J Orthop Surg (Hong Kong). 2012;20(3):331-335.

23. Jensen JE, Jensen TG, Smith TK, Johnston DA, Dudrick SJ. Nutrition in orthopaedic surgery. J Bone Joint Surg Am. 1982;64(9):1263-1272.

24. Fletcher RH, Fairfield KM. Vitamins for chronic disease prevention in adults: clinical applications. JAMA. 2002;287(23):3127-3129.

25. Flegal KM, Carroll MD, Kit BK, Ogden CL. Prevalence of obesity and trends in the distribution of body mass index among US adults, 1999-2010. JAMA. 2012;307(5):491-497.

26. Chen J, Cui Y, Li X, et al. Risk factors for deep infection after total knee arthroplasty: a meta-analysis. Arch Orthop Trauma Surg. 2013;133(5):675-687.

27. Dowsey MM, Choong PF. Obese diabetic patients are at substantial risk for deep infection after primary TKA. Clin Orthop Relat Res. 2009;467(6):1577-1581.

28. Everhart JS, Altneu E, Calhoun JH. Medical comorbidities are independent preoperative risk factors for surgical infection after total joint arthroplasty. Clin Orthop Relat Res. 2013;471(10):3112-3119.

29. Malinzak RA, Ritter MA, Berend ME, Meding JB, Olberding EM, Davis KE. Morbidly obese, diabetic, younger, and unilateral joint arthroplasty patients have elevated total joint arthroplasty infection rates. J Arthroplasty. 2009;24(6 Suppl):84-88.

30. Jibodh SR, Gurkan I, Wenz JF. In-hospital outcome and resource use in hip arthroplasty: influence of body mass. Orthopedics. 2004;27(6):594-601.

31. Peersman G, Laskin R, Davis J, Peterson MG, Richart T. Prolonged operative time correlates with increased infection rate after total knee arthroplasty. HSS J. 2006;2(1):70-72.

32. McElroy MJ, Pivec R, Issa K, Harwin SF, Mont MA. The effects of obesity and morbid obesity on outcomes in TKA. J Knee Surg. 2013;26(2):83-88.

33. Freeman JT, Anderson DJ, Hartwig MG, Sexton DJ. Surgical site infections following bariatric surgery in community hospitals: a weighty concern? Obes Surg. 2011;21(7):836-840.

34. Singh JA, Houston TK, Ponce BA, et al. Smoking as a risk factor for short-term outcomes following primary total hip and total knee replacement in veterans. Arthritis Care Res (Hoboken). 2011;63(10):1365-1374.

35. Mills E, Eyawo O, Lockhart I, Kelly S, Wu P, Ebbert JO. Smoking cessation reduces postoperative complications: a systematic review and meta-analysis. Am J Med. 2011;124(2):144-154 e148.

36. Myers K, Hajek P, Hinds C, McRobbie H. Stopping smoking shortly before surgery and postoperative complications: a systematic review and meta-analysis. Arch Intern Med. 2011;171(11):983-989.

37. Sorensen LT. Wound healing and infection in surgery. The clinical impact of smoking and smoking cessation: a systematic review and meta-analysis. Arch Surg. 2012;147(4):373-383.

38. Sorensen LT, Karlsmark T, Gottrup F. Abstinence from smoking reduces incisional wound infection: a randomized controlled trial. Ann Surg. 2003;238(1):1-5.

39. Sadr Azodi O, Bellocco R, Eriksson K, Adami J. The impact of tobacco use and body mass index on the length of stay in hospital and the risk of post-operative complications among patients undergoing total hip replacement. J Bone Joint Surg Br. 2006;88(10):1316-1320.

40. Lindstrom D, Sadr Azodi O, Wladis A, et al. Effects of a perioperative smoking cessation intervention on postoperative complications: a randomized trial. Ann Surg. 2008;248(5):739-745.

41. Harris AH, Reeder R, Ellerbe L, Bradley KA, Rubinsky AD, Giori NJ. Preoperative alcohol screening scores: association with complications in men undergoing total joint arthroplasty. J Bone Joint Surg Am. 2011;93(4):321-327.

42. Bradley KA, Rubinsky AD, Sun H, et al. Alcohol screening and risk of postoperative complications in male VA patients undergoing major non-cardiac surgery. J Gen Intern Med. 2011;26(2):162-169.

43. Tonnesen H, Rosenberg J, Nielsen HJ, et al. Effect of preoperative abstinence on poor postoperative outcome in alcohol misusers: randomised controlled trial. BMJ. 1999;318(7194):1311-1316.

44. Sunday JM, Guille JT, Torg JS. Complications of joint arthroplasty in patients with end-stage renal disease on hemodialysis. Clin Orthop Relat Res. 2002;(397):350-355.

45. Lieberman JR, Fuchs MD, Haas SB, et al. Hip arthroplasty in patients with chronic renal failure. J Arthroplasty. 1995;10(2):191-195.

46. Sakalkale DP, Hozack WJ, Rothman RH. Total hip arthroplasty in patients on long-term renal dialysis. J Arthroplasty. 1999;14(5):571-575.

47. Pour AE, Matar WY, Jafari SM, Purtill JJ, Austin MS, Parvizi J. Total joint arthroplasty in patients with hepatitis C. J Bone Joint Surg Am. 2011;93(15):1448-1454.

48. Hsieh PH, Chen LH, Lee MS, Chen CH, Yang WE, Shih CH. Hip arthroplasty in patients with cirrhosis of the liver. J Bone Joint Surg Br. 2003;85(6):818-821.

49. Cohen SM, Te HS, Levitsky J. Operative risk of total hip and knee arthroplasty in cirrhotic patients. J Arthroplasty. 2005;20(4):460-466.

50. Berbari EF, Osmon DR, Lahr B, et al. The Mayo prosthetic joint infection risk score: implication for surgical site infection reporting and risk stratification. Infect Control Hosp Epidemiol. 2012;33(8):774-781.

51. Guichelaar MM, Schmoll J, Malinchoc M, Hay JE. Fractures and avascular necrosis before and after orthotopic liver transplantation: long-term follow-up and predictive factors. Hepatology. 2007;46(4):1198-1207.

52. Ramsey-Goldman R, Dunn JE, Dunlop DD, et al. Increased risk of fracture in patients receiving solid organ transplants. J Bone Miner Res. 1999;14(3):456-463.

53. Tannenbaum DA, Matthews LS, Grady-Benson JC. Infection around joint replacements in patients who have a renal or liver transplantation. J Bone Joint Surg Am. 1997;79(1):36-43.

54. Lehman CR, Ries MD, Paiement GD, Davidson AB. Infection after total joint arthroplasty in patients with human immunodeficiency virus or intravenous drug use. J Arthroplasty. 2001;16(3):330-335.

55. Habermann B, Eberhardt C, Kurth AA. Total joint replacement in HIV positive patients. J Infect. 2008;57(1):41-46.

56. Hicks JL, Ribbans WJ, Buzzard B, et al. Infected joint replacements in HIV-positive patients with haemophilia. J Bone Joint Surg Br. 2001;83(7):1050-1054.

57. Lee J, Singletary R, Schmader K, Anderson DJ, Bolognesi M, Kaye KS. Surgical site infection in the elderly following orthopaedic surgery. Risk factors and outcomes. J Bone Joint Surg Am. 2006;88(8):1705-1712.

58. Jamsen E, Huhtala H, Puolakka T, Moilanen T. Risk factors for infection after knee arthroplasty. A register-based analysis of 43,149 cases. J Bone Joint Surg Am. 2009;91(1):38-47.

59. Kurtz SM, Ong KL, Lau E, Bozic KJ, Berry D, Parvizi J. Prosthetic joint infection risk after TKA in the Medicare population. Clin Orthop Relat Res. 2010;468(1):52-56.

60. Willis-Owen CA, Konyves A, Martin DK. Factors affecting the incidence of infection in hip and knee replacement: an analysis of 5277 cases. J Bone Joint Surg Br. 2010;92(8):1128-1133.

61. Dye BA, Tan S, Smith V, et al. Trends in oral health status: United States, 1988-1994 and 1999-2004. Vital Health Stat 11. 2007(248):1-92.

62. Bartzokas CA, Johnson R, Jane M, Martin MV, Pearce PK, Saw Y. Relation between mouth and haematogenous infection in total joint replacements. BMJ. 20-27 1994;309(6953):506-508.

63. Barrington JW, Barrington TA. What is the true incidence of dental pathology in the total joint arthroplasty population? J Arthroplasty. 2011;26(6 Suppl):88-91.

64. LaPorte DM, Waldman BJ, Mont MA, Hungerford DS. Infections associated with dental procedures in total hip arthroplasty. J Bone Joint Surg Br. 1999;81(1):56-59.

65. Sandhu SS, Lowry JC, Morton ME, Reuben SF. Antibiotic prophylaxis, dental treatment and arthroplasty: time to explode a myth. J Bone Joint Surg Br. 1997;79(4):521-522.

66. Parvizi J, Della Valle CJ. AAOS Clinical Practice Guideline: diagnosis and treatment of periprosthetic joint infections of the hip and knee. J Am Acad Orthop Surg. 2010;18(12):771-772.

67. Perl TM, Golub JE. New approaches to reduce Staphylococcus aureus nosocomial infection rates: treating S. aureus nasal carriage. Ann Pharmacother. 1998;32(1):S7-16.

68. Kenner J, O'Connor T, Piantanida N, et al. Rates of carriage of methicillin-resistant and methicillin-susceptible Staphylococcus aureus in an outpatient population. Infect Control Hosp Epidemiol. 2003;24(6):439-444.

69. Schwarzkopf R, Takemoto RC, Immerman I, Slover JD, Bosco JA. Prevalence of Staphylococcus aureus colonization in orthopaedic surgeons and their patients: a prospective cohort controlled study. J Bone Joint Surg Am. 2010;92(9):1815-1819.

70. Kalmeijer MD, van Nieuwland-Bollen E, Bogaers-Hofman D, de Baere GA. Nasal carriage of Staphylococcus aureus is a major risk factor for surgical-site infections in orthopedic surgery. Infect Control Hosp Epidemiol. 2000;21(5):319-323.

71. Hacek DM, Robb WJ, Paule SM, Kudrna JC, Stamos VP, Peterson LR. Staphylococcus aureus nasal decolonization in joint replacement surgery reduces infection. Clin Orthop Relat Res. 2008;466(6):1349-1355.

72. Schweizer M, Perencevich E, McDanel J, et al. Effectiveness of a bundled intervention of decolonization and prophylaxis to decrease Gram positive surgical site infections after cardiac or orthopedic surgery: systematic review and meta-analysis. BMJ. 2013;346:f2743.

73. Kallen AJ, Wilson CT, Larson RJ. Perioperative intranasal mupirocin for the prevention of surgical-site infections: systematic review of the literature and meta-analysis. Infect Control Hosp Epidemiol. 2005;26(12):916-922.

74. van Rijen MM, Bonten M, Wenzel RP, Kluytmans JA. Intranasal mupirocin for reduction of Staphylococcus aureus infections in surgical patients with nasal carriage: a systematic review. J Antimicrob Chemother. 2008;61(2):254-261.

75. Johnson AJ, Daley JA, Zywiel MG, Delanois RE, Mont MA. Preoperative chlorhexidine preparation and the incidence of surgical site infections after hip arthroplasty. J Arthroplasty. 2010;25(6 Suppl):98-102.

76. Cox RA, Conquest C. Strategies for the management of healthcare staff colonized with epidemic methicillin-resistant Staphylococcus aureus. J Hosp Infect. 1997;35(2):117-127.

77. Muder RR, Brennen C, Goetz AM. Infection with methicillin-resistant Staphylococcus aureus among hospital employees. Infect Control Hosp Epidemiol. 1993;14(10):576-578.

78. Simmons BP, Munn C, Gelfand M. Toxic shock in a hospital employee due to methicillin-resistant Staphylococcus aureus. Infect Control. 1986;7(7):350.

79. Dutch Working Party for Infection Prevention. MRSA in nursing homes. 2007; [www.wip.nl](http://www.wip.nl), Accessed 2013.

80. Garner JS. Guideline for isolation precautions in hospitals. The Hospital Infection Control Practices Advisory Committee. Infect Control Hosp Epidemiol. 1996;17(1):53-80.

81. Mitteilung der Kommission für Krankenhaushygiene und Infektionsprävention am RKI. Empfehlung zur prävention und Kontrolle von methicillin-resist-enten Staphylococcus aureus-Stämmen (MRSA) in Krankenhäusern under anderen medizinischen Einrichtungen. Bundesgesundheitbsbl-Gesundheitsforsch-Gesundheitsschutz. 1999;42:954-956.

82. Bowler I. Strategies for the management of healthcare staff colonized with epidemic methicillin-resistant Staphylococcus aureus. J Hosp Infect. 1997;36(4):321-322.

83. Lessing MP, Jordens JZ, Bowler IC. When should healthcare workers be screened for methicillin-resistant Staphylococcus aureus? J Hosp Infect. 1996;34(3):205-210.

84. Koulouvaris P, Sculco P, Finerty E, Sculco T, Sharrock NE. Relationship between perioperative urinary tract infection and deep infection after joint arthroplasty. Clin Orthop Relat Res. 2009;467(7):1859-1867.

85. Ollivere BJ, Ellahee N, Logan K, Miller-Jones JC, Allen PW. Asymptomatic urinary tract colonisation predisposes to superficial wound infection in elective orthopaedic surgery. Int Orthop. 2009;33(3):847-850.

86. Lawrence VA, Gafni A, Gross M. The unproven utility of the preoperative urinalysis: economic evaluation. J Clin Epidemiol. 1989;42(12):1185-1192.

87. Nicolle LE, Bradley S, Colgan R, Rice JC, Schaeffer A, Hooton TM. Infectious Diseases Society of America guidelines for the diagnosis and treatment of asymptomatic bacteriuria in adults. Clin Infect Dis. 2005;40(5):643-654.

88. Rajamanickam A, Noor S, Usmani A. Should an asymptomatic patient with an abnormal urinalysis (bacteriuria or pyuria) be treated with antibiotics prior to major joint replacement surgery? Cleve Clin J Med. 2007;74(Suppl 1):S17-18.

89. Bozic KJ, Lau E, Kurtz S, et al. Patient-related risk factors for periprosthetic joint infection and postoperative mortality following total hip arthroplasty in Medicare patients. J Bone Joint Surg Am. 2012;94(9):794-800.

90. Schrama JC, Espehaug B, Hallan G, et al. Risk of revision for infection in primary total hip and knee arthroplasty in patients with rheumatoid arthritis compared with osteoarthritis: a prospective, population-based study on 108,786 hip and knee joint arthroplasties from the Norwegian Arthroplasty Register. Arthritis Care Res (Hoboken). 2010;62(4):473-479.

91. Howe CR, Gardner GC, Kadel NJ. Perioperative medication management for the patient with rheumatoid arthritis. J Am Acad Orthop Surg. 2006;14(9):544-551.

92. Jain A, Maini R, Nanchahal J. Disease modifying treatment and elective surgery in rheumatoid arthritis: the need for more data. Ann Rheum Dis. 2004;63(5):602-603.

93. Giles JT, Bartlett SJ, Gelber AC, et al. Tumor necrosis factor inhibitor therapy and risk of serious postoperative orthopedic infection in rheumatoid arthritis. Arthritis Rheum. 2006;55(2):333-337.

94. Momohara S, Kawakami K, Iwamoto T, et al. Prosthetic joint infection after total hip or knee arthroplasty in rheumatoid arthritis patients treated with nonbiologic and biologic disease-modifying antirheumatic drugs. Mod Rheumatol. 2011;21(5):469-475.

95. Grennan DM, Gray J, Loudon J, Fear S. Methotrexate and early postoperative complications in patients with rheumatoid arthritis undergoing elective orthopaedic surgery. Ann Rheum Dis. 2001;60(3):214-217.

96. Perhala RS, Wilke WS, Clough JD, Segal AM. Local infectious complications following large joint replacement in rheumatoid arthritis patients treated with methotrexate versus those not treated with methotrexate. Arthritis Rheum. 1991;34(2):146-152.

97. Carpenter MT, West SG, Vogelgesang SA, Casey Jones DE. Postoperative joint infections in rheumatoid arthritis patients on methotrexate therapy. Orthopedics. 1996;19(3):207-210.

98. Health Canada Drug Product Database. May 28, 2013. Available at: <http://hc-sc.gc.ca/dhp-mps/prodpharma/databasdon/index-eng.php>. Accessed 2013.

99. Le Dantec L, Maury F, Flipo RM, et al. Peripheral pyogenic arthritis. A study of one hundred seventy-nine cases. Rev Rhum Engl Ed. 1996;63(2):103-110.

100. Morgan DS, Fisher D, Merianos A, Currie BJ. An 18 year clinical review of septic arthritis from tropical Australia. Epidemiol Infect. 1996;117(3):423-428.

101. Ryan MJ, Kavanagh R, Wall PG, Hazleman BL. Bacterial joint infections in England and Wales: analysis of bacterial isolates over a four year period. Br J Rheumatol. 1997;36(3):370-373.

102. Li SF, Cassidy C, Chang C, Gharib S, Torres J. Diagnostic utility of laboratory tests in septic arthritis. Emerg Med J. 2007;24(2):75-77.

103. Li SF, Henderson J, Dickman E, Darzynkiewicz R. Laboratory tests in adults with monoarticular arthritis: can they rule out a septic joint? Acad Emerg Med. 2004;11(3):276-280.

104. Margaretten ME, Kohlwes J, Moore D, Bent S. Does this adult patient have septic arthritis? JAMA. 2007;297(13):1478-1488.

105. Parvizi J, Jacovides C, Zmistowski B, Jung KA. Definition of periprosthetic joint infection: is there a consensus? Clin Orthop Relat Res. 2011;469(11):3022-3030.

106. Spangehl MJ, Masri BA, O'Connell JX, Duncan CP. Prospective analysis of preoperative and intraoperative investigations for the diagnosis of infection at the sites of two hundred and two revision total hip arthroplasties. J Bone Joint Surg Am. 1999;81(5):672-683.

107. Atkins BL, Athanasou N, Deeks JJ, et al. Prospective evaluation of criteria for microbiological diagnosis of prosthetic-joint infection at revision arthroplasty. The OSIRIS Collaborative Study Group. J Clin Microbiol. 1998;36(10):2932-2939.

**Workgroup 2: Perioperative Skin Preparation**

**Liaison:**

Anthony T Tokarski BS

**Leaders:**

David Blaha MD (US), Michael A Mont MD (US), Parag Sancheti MS, DNB, MCh (International)

**Delegates:**

Lyssette Cardona MD, MPH, MHA, AAHIVS, FIDSA, Gilberto Lara Cotacio MD, Mark Froimson MD, Bhaveen Kapadia MD, James Kuderna MD, PhD, Juan Carlos López MD, Wadih Y Matar MD, MSc, FRCSC, Joseph McCarthy MD, Rhidian Morgan-Jones MB BCh, FRCS, Michael Patzakis MD, Ran Schwarzkopf MD, Gholam Hossain Shahcheraghi MD, Xifu Shang MD, Petri Virolainen MD, PhD, Montri D Wongworawat MD, Adolph Yates Jr MD

**Question 1A: Is there a role for preoperative skin cleansing with an antiseptic?**

**Consensus:** Yes. Preoperative cleansing of the skin with chlorhexidine gluconate (CHG) should be implemented. In the presence of a sensitivity to CHG, or when it is unavailable, it is our consensus that antiseptic soap is appropriate.

**Delegate Vote:** Agree: 90%, Disagree: 8%, Abstain: 2% (Strong Consensus)

**Question 1B: What type and when should preoperative skin cleansing with an antiseptic be implemented?**

**Consensus:** We recommend that whole-body skin cleansing should start at least the night prior to elective arthroplasty. It is a consensus that after bathing patients are advised to sleep in clean garments and bedding without the application of any topical products.

**Delegate Vote:** Agree: 85%, Disagree: 10%, Abstain: 5% (Strong Consensus)

**Justification:**

Preoperative showering or cleansing

Two meta-analyses of seven randomized control trials (RCTs) performed by the Cochrane group found that preoperative showering with CHG did not reduce the rate of surgical site infection (SSI) when compared to no shower (three RCTs) or placebo (four RCTs).1 Two observational studies using CHG wipes in total joint arthroplasty patients demonstrated a statistically nonsignificant reduction in the incidence of SSI.2,3 Johnson et al. found in a prospective consecutive series that patients who used CHG wipes 1 day preoperatively and the morning of the operation had a lower incidence of SSI than patients who did not comply with this protocol prior to total hip arthroplasty.2 These results were reproduced using a similar protocol in total knee arthroplasty patients.3 In neither study were patients randomized to receive treatment or no treatment; however, the authors compared patients who completely complied with the protocol to patients who did not comply. Patients with partial compliance were excluded from both studies.

Chlorhexidine and methicillin-resistant organisms

A systematic review of the literature conducted by Karki et al. reported on a meta-analysis of two before-and-after studies that showed nonrinse skin cleansing with CHG washcloths was effective in reducing the risk of methicillin-resistant *Staphylococcus aureus* (MRSA) skin colonization in the setting of the intensive care unit. However, a meta-analysis of 4 before-and-after studies showed no evidence that CHG washcloths reduce the risk of MRSA infection.4 Other studies have shown that CHG cleansing leads to a lower rate of MRSA colonization in the hospital setting.5,6 One case-control study evaluating a protocol of a 5-day course of intranasal mupirocin and daily CHG cloths (beginning 1 day before surgery and continuing the day of surgery and postoperative days 1-3) in a nongeneral surgery population reported statistically significant decreases in the rate of MRSA SSI in the 2 years following implementation of this protocol.7 However, in these studies, CHG washcloths were used as part of a broader *Staphylococcus aureus* decolonization protocol. Therefore, it is not possible to determine the impact on SSI of decolonization or CHG washcloths, independently.

Timing of preoperative shower or cleansing

No studies have focused on the impact of the time or duration of preoperative cleansing with an antiseptic agent. Some studies have implemented protocols of washing the surgical site once on the night prior to surgery and on the morning of the operation,3,8,9 while other protocols have continued washing through postoperative day 3.7 One study conducted with a small sample size of volunteers noted decreased microbial colonization with a CHG wash over the course of a 5-day period.37 Currently, the Centers for Disease Control and Prevention (CDC) recommends that preoperative showering begin at least the night prior to surgery.10 Caution should be exercised to ensure that patients do not use preoperative CHG wash excessively, as studies suggest no benefit for such practice that may also lead to skin irritation.11,12

Whole-body cleansing vs localized surgical site-specific cleansing

One large RCT showed that whole-body cleansing was more effective at reducing the rate of SSI than surgical site-specific washing.13 We recommend that whole-body preoperative skin cleansing be undertaken preoperatively.

**Question 2: Which agent, if any, is the optimal agent for surgical skin preparation?**

**Consensus:** There is no clear difference among various skin preparation agents. There is some evidence that combinations of antiseptic agents with alcohol may be important for skin antisepsis**.**

**Delegate Vote:** Agree: 89%, Disagree: 8%, Abstain: 3% (Strong Consensus)

**Justification:**

While CHG is the recommended agent for preventing intravenous catheter-related infections,14 the CDC currently does not recommend one agent over another for prevention of SSI.10 When compared directly, results are conflicted as to whether CHG or povidone-iodine provides superior skin antisepsis and lowers the rate of SSI. In a large, multicenter RCT, Darouiche et al. showed that CHG in alcohol showed a significant reduction in the rate of SSI when compared to aqueous povidone-iodine scrub and paint; however, the iodine preparation did not use alcohol as a solvent.15 Conversely, in a single-institution, observational, nonconcurrent control study of general surgery patients, Swenson et al. found that when alcohol was used (either as a solvent or a scrub following iodine paint), patients prepped with povidone-iodine had a lower rate of SSI.16 Other studies have shown that there is no difference in the rate of SSI between patients prepped with either CHG or iodophors.17,18 To date, there are no prospective randomized studies comparing skin preps in patients undergoing total joint arthroplasty. We therefore have insufficient evidence to recommend a preferred agent for preventing SSI in elective arthroplasty procedures.

Alcohol is used as an antiseptic because of its rapid antimicrobial action.10 One systematic review of five RTCs found that CHG-alcohol formulations were more effective at preventing SSI than aqueous povidone-iodine solutions, and in other studies there was no conclusive evidence that CHG-alcohol solutions were more effective than povidone-iodine products dissolved in alcohol or aqueous solutions.19 While we cannot make a claim about the superiority of CHG over iodine-based antiseptics, it is suggested that whichever agent is chosen, it be dissolved in alcohol. However, caution should be taken to allow time for adequate drying of alcohol-based products, as operating room fires have been reported.10,20

**Question 3A: What is the proper method of hair removal?**

**Consensus:** Clipping, as opposed to shaving, is the preferred method for hair removal. We cannot advise for or against the use of depilatory cream for removal of hair.

**Delegate Vote:** Agree: 92%, Disagree: 3%, Abstain: 5% (Strong Consensus)

**Question 3B: When should hair removal be performed?**

**Consensus:** If necessary, hair removal should be performed as close to the time of the surgical procedure as possible.

**Delegate Vote:** Agree: 94%, Disagree: 4%, Abstain: 2% (Strong Consensus)

**Justification:**

Clipping is the best form of hair removal: Concern over shaving has been raised because abrasions formed from the shaving process can become sites of bacterial growth. A recent systematic review of randomized and quasi-RCTs showed that clipping lowered the rate of SSI when compared to shaving.21 Many other studies have shown the superiority of clipping over shaving, using postoperative SSI as the primary end point.22-24 Some institutions utilize depilatory agents as skin preparation.

Hair removal should be performed close to the time of surgery: There is currently no evidence in the literature that shows the most appropriate setting and time in which to remove hair from the surgical site. One study investigated the effects of hair removal the night before surgery compared to hair removal on the day of surgery and found that clipping on the morning of surgery was associated with a lower SSI rate.25 Another retrospective review demonstrated that shaving immediately before a surgical procedure was associated with a lower SSI rate than shaving ≥ 24 hours prior to surgery. However, this study did not include patients who used clipping to remove hair and was designed to test the effect of shaving versus depilatory removal.26 The CDC recommends not removing hair preoperatively unless the hair at or around the incision site will interfere with the operation. If hair removal is necessary, it should be performed immediately prior to the operation and preferably with electric clippers.10 Given the overall lack of research specific to the environment in which preoperative hair removal should take place, we recommend that hair removal be performed in the hospital as close to the time of surgery as possible by either the surgical team or the trained nursing staff. If practical, we suggest that this removal take place outside of the operating room.

**Question 4: What special considerations should be given to a patient with skin lesions?**

**Consensus:** Elective arthroplasty should NOT be performed in patients with active ulceration of the skin in the vicinity of the surgical site. It is our consensus that incisions should not be placed through active skin lesions. For certain lesions, such as those due to eczema and psoriasis, surgery should be delayed in these patients until their lesions have been optimized.

**Delegate Vote:** Agree: 96%, Disagree: 2%, Abstain: 2% (Strong Consensus)

**Justification:**

Elective arthroplasty in patients with active skin ulcerations: The orthopaedic literature is deficient in studies evaluating SSI in patients with active skin ulcerations. However, one prospective audit showed that active ulceration of the skin was a significant risk factor for wound infection.27 Therefore, we recommend that elective arthroplasty should not be carried out in patients with active skin ulcerations of the surgical field (active ulcerations defined as breaks in the skin barrier, excluding superficial scratches).

Surgical incisions through eczematous or psoriatic lesions: Likewise, there are no existing studies evaluating the risk of SSI when incisions are placed through eczematous or psoriatic lesions. Some retrospective studies have reported high rates of SSI and periprosthetic joint infection (PJI) in patients with a diagnosis of psoriasis or eczema.28,29 However, the latter studies did not evaluate whether it was the placement of incision through the affected skin or the overall immunosuppressed status of these patients with psoriasis or eczema that increased the risk of SSI. Given reported poor outcomes as well as increased bacterial load on psoriatic skin,30 placing surgical incisions through eczematous or psoriatic lesions should be avoided if possible. Surgery should be delayed in these patients until these lesions are optimized.

**Question 5A: How should the surgeon and assistants wash their hands?**

**Consensus:** The surgeon and operating room personnel should mechanically wash their hands with an antiseptic agent for a minimum of 2 minutes for the first case. A shorter period may be appropriate for subsequent cases.

**Delegate Vote:** Agree: 71%, Disagree: 24%, Abstain: 5% (Strong Consensus)

**Question 5B: With what agent should the surgeon and assistants wash their hands?**

**Consensus:** There is no clear difference among various antiseptic agents for hand washing.

**Delegate Vote:** Agree: 80%, Disagree: 15%, Abstain: 5% (Strong Consensus)

**Justification:**

Duration of hand washing: A review of the literature preformed by Tanner et al. found four RCTs comparing different durations of surgical team skin antisepsis.31-34 All of the studies used colony forming units (CFUs) present on the surgical staff’s hands, not SSI, as the primary end point. One study found no difference between a 2- or a 3-minute scrub and a 1-minute hand washing with soap and water.34 Another group found that a 1-minute hand washing followed by a 3-minute hand rub using alcohol was more effective in reducing CFUs than a 5-minute hand rub.31 Pereira et al. found that both a 5- and 3-minute initial scrub with either CHG or povidone-iodine were equally as effective in reducing CFUs.32,35 Current recommendations vary on the duration of hand antisepsis; the CDC recommends 2-5 minutes,10 while the Association of Perioperative Registered Nurses states that a 3- to 4-minute scrub is as effective as a 5-minute scrub.36 Based on the variability present in the current literature, we recommend that the duration of surgical hand antisepsis last for a minimum of 2 minutes. For the first case, we recommend a mechanical washing (either a scrub or soap-and-water washing) for a minimum of 2 minutes. There is no clear evidence supporting the utility of a particular hand washing method for subsequent cases. If there is a chance of contamination, the process for the first case should be repeated.

Optimum agent for hand washing: Results are inconclusive regarding the most effective agent for surgical hand antisepsis. Only one of 10 RCTs in the systematic review performed by Tanner et al.33 reported SSI as the primary outcome. One large, multicenter, prospective, equivalence-cluster, randomized crossover study demonstrated that traditional (5-minute) scrubbing methods and aqueous agents (4% CHG or 4% povidone-iodine) were equally as effective at reducing the incidence of SSI compared to a single hand wash for 1 minute with nonantiseptic soap at the start of the day followed by alcohol-only rubs. The efficacy of CHG compared to povidone-iodine was not directly tested as each institution was able to choose which scrub agent they incorporated into their protocol.37 A retrospective, observational study that used wound infection as the primary end point found no difference between an alcohol-based rub product and a traditional 6-minute brush hand scrubbing; however, the authors did not describe the protocol or agent used for the traditional scrub group arm.38

**References:**

1. Webster J, Osborne S. Preoperative bathing or showering with skin antiseptics to prevent surgical site infection. Cochrane Database Syst Rev. 2012;9:CD004985.

2. Johnson AJ, Daley JA, Zywiel MG, Delanois RE, Mont MA. Preoperative chlorhexidine preparation and the incidence of surgical site infections after hip arthroplasty. J Arthroplasty. 2010;25(6 Suppl):98-102.

3. Zywiel MG, Daley JA, Delanois RE, Naziri Q, Johnson AJ, Mont MA. Advance pre-operative chlorhexidine reduces the incidence of surgical site infections in knee arthroplasty. Int Orthop. 2011;35(7):1001-1006.

4. Karki S, Cheng AC. Impact of non-rinse skin cleansing with chlorhexidine gluconate on prevention of healthcare-associated infections and colonization with multi-resistant organisms: a systematic review. J Hosp Infect. 2012;82(2):71-84.

5. Mehta S, Hadley S, Hutzler L, Slover J, Phillips M, Bosco JA 3rd. Impact of preoperative MRSA screening and decolonization on hospital-acquired MRSA burden. Clin Orthop Relat Res. 2013;471(7):2367-2371.

6. Simor AE, Phillips E, McGeer A, et al. Randomized controlled trial of chlorhexidine gluconate for washing, intranasal mupirocin, and rifampin and doxycycline versus no treatment for the eradication of methicillin-resistant Staphylococcus aureus colonization. Clin Infect Dis. 2007;44(2):178-185.

7. Thompson P, Houston S. Decreasing methicillin-resistant Staphylococcus aureus surgical site infections with chlorhexidine and mupirocin. Am J Infect Control. 2013;41(7):629-633.

8. Eiselt D. Presurgical skin preparation with a novel 2% chlorhexidine gluconate cloth reduces rates of surgical site infection in orthopaedic surgical patients. Orthop Nurs. 2009;28(3):141-145.

9. Halpern CH, Mitchell GW, Paul A, et al. Self-administered preoperative antiseptic wash to prevent postoperative infection after deep brain stimulation. Am J Infect Control. 2012;40(5):431-433.

10. Mangram AJ, Horan TC, Pearson ML, Silver LC, Jarvis WR. Guideline for Prevention of Surgical Site Infection, 1999. Centers for Disease Control and Prevention (CDC) Hospital Infection Control Practices Advisory Committee. Am J Infect Control. 1999;27(2):97-132; quiz 133-134; discussion 196.

11. Lilly HA, Lowbury EJ, Wilkins MD. Limits to progressive reduction of resident skin bacteria by disinfection. J Clin Pathol. 1979;32(4):382-385.

12. Lowbury EJ, Lilly HA. Use of 4 per cent chlorhexidine detergent solution (Hibiscrub) and other methods of skin disinfection. Br Med J. Mar 3 1973;1(5852):510-515.

13. Wihlborg O. The effect of washing with chlorhexidine soap on wound infection rate in general surgery. A controlled clinical study. Ann Chir Gynaecol. 1987;76(5):263-265.

14. O'Grady NP, Alexander M, Burns LA, et al. Guidelines for the prevention of intravascular catheter-related infections. Clin Infect Dis. 2011;52(9):e162-193.

15. Darouiche RO, Wall MJ Jr, Itani KM, et al. Chlorhexidine-alcohol versus povidone-Iodine for surgical-site antisepsis. N Engl J Med. 2010;362(1):18-26.

16. Swenson BR, Hedrick TL, Metzger R, Bonatti H, Pruett TL, Sawyer RG. Effects of preoperative skin preparation on postoperative wound infection rates: a prospective study of 3 skin preparation protocols. Infect Control Hosp Epidemiol. 2009;30(10):964-971.

17. Saltzman MD, Nuber GW, Gryzlo SM, Marecek GS, Koh JL. Efficacy of surgical preparation solutions in shoulder surgery. J Bone Joint Surg Am. 2009;91(8):1949-1953.

18. Sistla SC, Prabhu G, Sistla S, Sadasivan J. Minimizing wound contamination in a 'clean' surgery: comparison of chlorhexidine-ethanol and povidone-iodine. Chemotherapy. 2010;56(4):261-267.

19. Dumville JC, McFarlane E, Edwards P, Lipp A, Holmes A. Preoperative skin antiseptics for preventing surgical wound infections after clean surgery. Cochrane Database Syst Rev. 2013;3:CD003949.

20. Apfelbaum JL, Caplan RA, Barker SJ, et al. Practice advisory for the prevention and management of operating room fires: an updated report by the American Society of Anesthesiologists Task Force on Operating Room Fires. Anesthesiology. 2013;118(2):271-290.

21. Tanner J, Norrie P, Melen K. Preoperative hair removal to reduce surgical site infection. Cochrane Database Syst Rev. 2011(11):CD004122.

22. Balthazar ER, Colt JD, Nichols RL. Preoperative hair removal: a random prospective study of shaving versus clipping. South Med J. 1982;75(7):799-801.

23. Ko W, Lazenby WD, Zelano JA, Isom OW, Krieger KH. Effects of shaving methods and intraoperative irrigation on suppurative mediastinitis after bypass operations. Ann Thorac Surg. 1992;53(2):301-305.

24. Sellick JA Jr, Stelmach M, Mylotte JM. Surveillance of surgical wound infections following open heart surgery. Infect Control Hosp Epidemiol. 1991;12(10):591-596.

25. Alexander JW, Fischer JE, Boyajian M, Palmquist J, Morris MJ. The influence of hair-removal methods on wound infections. Arch Surg. 1983;118(3):347-352.

26. Seropian R, Reynolds BM. Wound infections after preoperative depilatory versus razor preparation. Am J Surg. 1971;121(3):251-254.

27. Penington A. Ulceration and antihypertensive use are risk factors for infection after skin lesion excision. ANZ J Surg. 2010;80(9):642-645.

28. Menon TJ, Wroblewski BM. Charnley low-friction arthroplasty in patients with psoriasis. Clin Orthop Relat Res. 1983;(176):127-128.

29. Stern SH, Insall JN, Windsor RE, Inglis AE, Dines DM. Total knee arthroplasty in patients with psoriasis. Clin Orthop Relat Res. 1989;(248):108-110; discussion 111.

30. Aly R, Maibach HE, Mandel A. Bacterial flora in psoriasis. Br J Dermatol. 1976;95(6):603-606.

31. Kappstein I, Schulgen G, Waninger J, Daschner F. [Microbiological and economic studies of abbreviated procedures for surgical hand disinfection]. Chirurg. 1993;64(5):400-405.

32. Pereira LJ, Lee GM, Wade KJ. The effect of surgical handwashing routines on the microbial counts of operating room nurses. Am J Infect Control. 1990;18(6):354-364.

33. Tanner J, Swarbrook S, Stuart J. Surgical hand antisepsis to reduce surgical site infection. Cochrane Database Syst Rev. 2008(1):CD004288.

34. Wheelock SM, Lookinland S. Effect of surgical hand scrub time on subsequent bacterial growth. AORN J. 1997;65(6):1087-1092; 1094-1088.

35. Pereira LJ, Lee GM, Wade KJ. An evaluation of five protocols for surgical handwashing in relation to skin condition and microbial counts. J Hosp Infect. 1997;36(1):49-65.

36. Recommended practices for surgical hand antisepsis/hand scrubs. AORN J. 2004;79(2):416-418, 421-416, 429-431.

37. Parienti JJ, Thibon P, Heller R, et al. Hand-rubbing with an aqueous alcoholic solution vs traditional surgical hand-scrubbing and 30-day surgical site infection rates: a randomized equivalence study. JAMA. 2002;288(6):722-727.

38. Weight CJ, Lee MC, Palmer JS. Avagard hand antisepsis vs. traditional scrub in 3600 pediatric urologic procedures. Urology. 2010;76(1):15-17.

**Workgroup 3: Perioperative Antibiotics**

**Liaison:**

Erik Hansen MD

**Leaders:**

Katherine Belden MD, Randi Silibovsky MD (US), Markus Vogt MD (International)

**Delegates:**

William Arnold MD, PhD, Goran Bicanic MD, PhD, Stefano Bini MD, Fabio Catani MD, Jiying Chen MD, PhD, Mohammad Ghazavi MD, FRCSC, Karine M. Godefroy MD, Paul Holham MD, Hamid Hosseinzadeh MD, Kang II Kim MD, PhD, Klaus Kirketerp-Møller MD, Lars Lidgren MD PhD, Jian Hao Lin MD, Jess H Lonner MD, Christopher C Moore MD, Panayiotis Papagelopoulos MD, Lazaros Poultsides MD MSc PhD, R Lor Randall MD, Brian Roslund PharmD, Khalid Saleh MD MSC FRCSC MHCM, Julia V Salmon MD, Edward Schwarz PhD, Jose Stuyck MD, Annette W Dahl MD, Koji Yamada MD

**Question 1: What is the optimal timing of the preoperative dose of antibiotics?**

**Consensus:** The preoperative dose of antibiotics should be administered within 1 hour of surgical incision; this can be extended to 2 hours for vancomycin and fluoroquinolones. Furthermore, surveillance measures are critical in ensuring clinician compliance with this objective.

**Delegate Vote:** Agree: 97%, Disagree: 2%, Abstain: 1% (Strong Consensus)

**Justification:** The scientific rationale for antibiotic prophylaxis is to inhibit or eliminate contaminating microorganisms that gain access to the surgical site during the procedure, which reduces the probability of an established infection. Thus, the goal of administering preoperative antibiotics is to allow for adequate tissue (blood, soft tissue, and bone) concentrations by the time of incision. These antibiotics should exceed the minimum inhibitory concentration (MIC) for the organisms likely to be encountered for the duration of the operation. This depends on the antibiotic used. There are a number of studies that validate the importance of the preoperative dose of antibiotics in decreasing periprosthetic joint infection (PJI) and surgical site infection (SSI) in total joint arthroplasty (TJA). However, there are conflicting opinions as to the optimal timing of this dose. Some studies suggest that within 2 hours of incision is best, while others recommend scheduling the dose as close to surgical incision as possible. There are several institutional guidelines that support a 1-hour preoperative dose of antibiotics as a Surgical Care Improvement Project (SCIP) measure. In addition to these guidelines, it is critically important to have surveillance measures in place to document compliance with these protocols.

The American Academy of Orthopaedic Surgeons (AAOS), the Centers for Disease Control and Prevention (CDC), and SCIP guidelines recommend that prophylactic antibiotics be completely infused within 1 hour before the surgical incision.1 The AAOS recommendation for the use of intravenous antibiotic prophylaxis in primary TJA, recommendation 2, states that “timing and dosage of antibiotic administration should optimize the efficacy of the therapy. Prophylactic antibiotics should be administered within 1 hour before skin incision.” Due to extended infusion time, vancomycin and fluoroquinolones should be started within 2 hours before incision. When a proximal tourniquet is used, the antibiotic must be completely infused before inflation of tourniquet.2 The US advisory statement recommends that antimicrobial prophylaxis be administered within 1 hour before incision and discontinued within 24 hours after the end of the operation,3 while European guidelines recommend a single dose within 30 minutes before incision.4

Timing < 2 hours

The seminal article on this subject studied the timing of administration of prophylactic antibiotics and the risk of surgical wound infections in clean and clean-contaminated cases at a large community hospital.5 In a study of 2847 patients, 313 (11%) received TJA. The authors found that the rate of infection was lowest for patients who received an antibiotic from 0 to 2 hours before the incision.5 Specifically, of the 1708 patients who received prophylactic antibiotics during this time frame, only 10 (0.6%) subsequently developed SSI compared to 14 of 369 patients (3.8%) who received antibiotics 2-24 hours preoperatively, four of 282 patients (1.4%) who received antibiotics within 3 hours after incision, and 16 of 488 patients (3.3%) who received antibiotics 3-24 hours following incision. However, this study was conducted in 1985-1986, when there was considerable variation in timing of administration of the prophylactic antibiotic, and only 35% of patients received their dose within the contemporary standard of 1 hour prior to incision. Furthermore, the study did not find a significant difference in SSI rates when antibiotics were administered within 1-2 hours prior to incision compared with antibiotics administered 0-3 hours postoperatively.

Timing < 1 hour

The leadership of the Medicare National Surgical Infection Prevention Projected hosted the Surgical Infection Prevention Guideline Writers Workgroup (SIPGWW) meeting and utilized the available literature to draft a consensus paper. The position of the SIPGWW is that the infusion of the first antimicrobial dose should begin within 60 minutes before incision.3,6

Galandiuk et al. combined the results of two prospective randomized controlled trials (RCTs) that compared antibiotic prophylaxis (either single-dose piperacillin or multidose cefoxitin) in elective surgical procedures of the gastrointestinal tract. The authors found that among other negative predictors, administration of an antibiotic for > 60 minutes preoperatively was associated with a higher rate of infectious complications.7

In a large, retrospective cohort study using National Veterans Affairs data on prophylactic antibiotics of 32,459 surgical procedures from 2005 to 2009, Hawn et al. found that higher SSI rates were observed for antibiotic administration > 60 minutes prior to incision (unadjusted odds ratio [OR)] = 1.34, 95% confidence interval [CI)] = 1.08-1.66) compared with procedures in which antibiotics were administered within 1 hour of incision. However, in generalized additive models adjusted for patient, procedure, and antibiotic variables, no significant association was seen between prophylactic antibiotic timing and SSI.8

Timing 30-60 minutes

In a prospective cohort study at a single academic hospital analyzing the incidence of SSI by the timing of antimicrobial prophylaxis in a consecutive series of 3836 surgical procedures, Weber et al. determined that administration of single-shot prophylactic cefuroxime is more effective when given 30-59 minutes before incision than administration during the last 30 minutes. The overall SSI rate for this mixed cohort of general, vascular, and orthopaedic surgeries was 4.7% (180), and antimicrobial prophylaxis was administered within the final 30 minutes in 59% of all procedures. Multivariable logistic regression analysis showed a significant increase in the odds of SSI when antimicrobial prophylaxis was administered < 30 minutes (crude OR = 2.01; adjusted OR = 1.95, 95% CI = 1.4-2.8; p < 0.001) and 60 to 120 minutes (crude OR = 1.75; adjusted OR = 1.74; 95% CI = 1.0-2.9; p = 0.035) when compared with the reference interval of 30-59 minutes before incision.9

Timing < 30 minutes

In a large, prospective, multicenter observational study examining the relationship between antibiotic timing and SSI risk, Steinberg et al. determined that SSI risk increased incrementally as the interval of time between antibiotic infusion and creation of the incision increased. The authors analyzed the antimicrobial prophylaxis of 4472 randomly selected cardiac, hip or knee arthroplasty, and hysterectomy cases from 29 contributing hospitals, and ascertained SSI through the National Nosocomial Infections Surveillance system methodology. When antibiotics requiring long infusion times (eg, vancomycin) were excluded, the infection risk following administration of antibiotics within 30 minutes was 1.6% compared with 2.4% associated with administration of antibiotic between 31-60 minutes prior to surgery (OR = 1.74; 95% CI = 0.98-3.04).10

In another recent multicenter, observational study from the Netherlands assessing risk factors for postoperative infections in 1922 total hip arthroplasty (THA) cases, the authors found a similar pattern with a decreased rate of infection in those who received prophylaxis within 30 minutes prior to incision, although it did not reach statistical significance.4 These authors collected data about SSI and potential risks factors related to prophylaxis, the patient, and procedure from 11 hospitals that participated in the Surgical Prophylaxis and Surveillance Intervention project and used multivariate logistic regression analysis to identify those variables that were predictive of SSI. Although there was a nonsignificant trend for the lowest SSI rate in those patients who received prophylaxis 30 minutes before surgery, the highest odds ratios for SSI were found in patients who received prophylaxis after incision (OR = 2.8, 95% CI = 0.9-8.6; p = 0.07) and prolonged duration of surgery was the only statistically significant risk factor for SSI following THA.

Timing with Tourniquet Use

In an RCT of 22 patients in which cefuroxime prophylaxis was administered at various intervals (5, 10, 15, or 20 minutes) before inflation of the tourniquet for total knee arthroplasty (TKA), Johnson et al. measured antibiotic levels of bone and subcutaneous fat throughout the operation. They found that an interval of 10 minutes prior to tourniquet inflation was necessary to obtain adequate prophylaxis. While the patients obtained adequate levels in bone at 5 minutes, an interval of ≥ 10 minutes was required for patients to have therapeutic levels in the subcutaneous fat.11

In another similar RCT, 24 patients undergoing TKA were randomized to receive cefazolin 1, 2, or 5 minutes before tourniquet inflation. Serum, soft tissue, and bone samples were measured for adequate cefazolin concentration (defined as 4xMIC 90 [MIC 90 =1 μg/mL]). The median percentage of cefazolin penetration into soft tissue and bone for the 5-, 2-, and 1-minute groups was 14.5% and 4.6%, 6.7% and 3.0%, and 5.9% and 4.6%, respectively. The authors also noted that the percentage of patients achieving the ratio of 4xMIC 90 for soft tissue and bone was highest in the 5-minute group compared with either the 2- or 1-minute groups.12

In another prospective study by Soriano et al., 908 patients undergoing TKA were randomized to receive either 1.5 g cefuroxime 30 minutes before inflation of tourniquet and placebo 10 minutes before release of tourniquet (standard group) or placebo 30 minutes before inflation of tourniquet and 1.5 g cefuroxime 10 minutes before release of tourniquet. There was no difference among the patients with regard to various risk factors for SSI/PJI. The authors did not find a significant difference in the incidence of infection at 3.6% for the standard group and 2.6% for the control group at 12 months. The authors concluded that administration of antibiotics just prior to release of tourniquet was not inferior to a standard prophylactic regimen.13

Surveillance Measures

In a study evaluating the impact of a new national project meant to reduce infections in arthroplasty surgery in Sweden, Dahl et al. found that only 57% of patients received preoperative antibiotics during the recommended time frame. In 2009, following the introduction of the World Health Organization surgical checklist and a new Swedish Knee Arthroplasty Register (SKAR) reporting form, which included the time for administration of preoperative antibiotics, the number of patients receiving appropriately timed doses of preoperative antibiotics increased to 69% in 2009 and 79% in 2010.14

**Question 2: Is there an optimal antibiotic that should be administered for routine perioperative surgical prophylaxis?**

**Consensus:** A first- or second-generation cephalosporin (cefazolin or cefuroxime) should be administered for routine perioperative surgical prophylaxis. Isoxazolyl penicillin is used as an appropriate alternative.

**Delegate Vote:** Agree: 89%, Disagree: 8%, Abstain: 3% (Strong Consensus)

**Justification:** A first- or second-generation cephalosporin should be administered for routine perioperative surgical prophylaxis because of its broad spectrum of action, cost-effectiveness, and the need to preserve newer and more expensive therapies for drug-resistant microorganisms and emerging pathogens. These antibiotics cover gram-positive organisms and clinically important aerobic gram-negative bacilli and anaerobic gram positive organisms.6 Additionally, they have excellent distribution profiles in bone, synovium, muscle, and hematomas.15 Many studies have documented that minimum bactericidal concentrations for most non-methicillin-resistant *Staphylococcus aureus* (MRSA) organisms are achieved rapidly in these tissues, ie, within minutes after their administration.16,17 The optimal prophylactic antibiotic should be bactericidal (penicillin, cephalosporin, vancomycin, or aminoglycosides), not simply bacteriostatic (clindamycin, which is a lincosamide). The agent should also have a half-life that covers the decisive interval (the first 2 hours after incision or contamination) with therapeutic concentrations from time of incision to wound closure. Failure to maintain tissue concentrations above the MIC increases the risk of wound infection.18 In Scandinavia and elsewhere, isoxazolyl penicillin, such as cloxacillin, flucloxacillin, nafcillin, or oxacillin, is used as an appropriate alternative. Some institutions administer carbapenems (namely imipenem/cilastatin and meropenem) to patients with penicillin allergy, as they felt that the potential for cross-reactivity between carbapenems and penicillin is less than traditionally believed.19

In a multicenter, placebo RCT, Hill et al. convincingly demonstrated the efficacy of cefazolin for antimicrobial prophylaxis in reducing the risk of PJI. In 2137 THA patients randomized to either 5 days of cefazolin or placebo, antibiotic prophylaxis reduced the incidence of deep infection from 3.3% to 0.9% (p < 0.01).20

Tyllianakis et al. performed an RCT comparing cefuroxime to two specific antistaphylococcal agents (fusidic acid and vancomycin) for prophylaxis in THA and TKA in an institution where MRSA and methicillin-resistant *S. epidermidis* (MRSE) prevalence exceeded 25% of orthopaedic infections. In 435 patients (260 hips and 175 knees) followed for a minimum of 2 years, the authors found no statistically significant difference between the treatment groups for either THA or TKA, although the authors concede that the power to detect meaningful statistical differences between the groups was low and it was therefore difficult to provide any definitive conclusions.21

The efficacy of 1 day of cefuroxime versus 3 days of cefazolin on postoperative wound infections was studied by Mauerhan et al. in a double-blind, multicenter trial of 1354 patients undergoing hip and knee arthroplasty. The authors found no statistically significant difference between the two regimens. For the TKA patients, the rate of PJI was 0.6% (1/178) for those receiving cefuroxime versus 1.4% (three of 207) for those receiving cefazolin. For the THA patients, the rate of PJI was 0.5% (one of 187) for those receiving cefuroxime as compared to 1.2% (two of 168) for those receiving cefazolin.22

In a study investigating the bacterial colonization and resistance patterns of a cohort of patients undergoing primary joint arthroplasty in Sweden, Stefansdottir et al. noted that in Scandinavia, isoxazolylpenicillin derivative cloxacillin is the most commonly used prophylactic antibiotic. Moreover, these β-lactams were effective against 99% of the *S. aureus* strains and 80% of the coagulase-negative *Staphylococcus* (CNS) strains colonizing patients undergoing primary TJA. Furthermore, the gentamicin-laden bone cement used in many of these cases covers against most of the additional CNS strains.23

**Question 3: What is the choice of antibiotic in patients who have preexisting prostheses such as heart valves?**

**Consensus:** The choice of antibiotics for patients with preexisting prostheses such as heart valves is the same as that for routine elective arthroplasty.

**Delegate Vote:** Agree: 94%, Disagree: 3%, Abstain: 3% (Strong Consensus)

**Justification:** Patients with preexisting prostheses such as heart valves are at risk for infective endocarditis due to bacteremia, which is relatively rare but can lead to catastrophic complications and death. Guidelines for the prevention of infective endocarditis have been published by the American Heart Association (AHA) for > 50 years. The first nine guidelines (published between 1955 and 1997) were based on low-level evidence; only more recently have the guidelines been stratified based on lifetime risk of infective endocarditis. Similar to the change in recommendations regarding dental prophylaxis for patients undergoing TJA, the 2007 antibiotic prophylaxis guidelines for infective endocarditis from the AHA and the Infectious Disease Society of America (IDSA) recommend antibiotic prophylaxis only for patients at the highest risk of infective endocarditis and only for selected dental procedures (eg, those that involve manipulation of gingival tissue or the periapical region of teeth or perforation of the oral mucosa).24

Infections that complicate heart valve replacement and prosthetic joint replacement have several features in common. *S. aureus* and *S. epidermidis* are common pathogens and infection rates are similar.23-25 It is generally accepted that antimicrobial prophylaxis reduces the frequency of early postoperative infections; however, when such infections do occur, they are difficult to control without removing the prosthesis. The antibiotics that are recommended for endocarditis prophylaxis are similar to that of prophylaxis against PJI. Similarly, if an infection is known or suspected to be caused by *S. aureus*, the antibiotic regimen should contain an antistaphylococcal penicillin or a cephalosporin; whereas vancomycin should be used in those in whom an infection is known or suspected to be caused by MRSA.25

While there is literature to support the use of prophylactic antibiotics up to 48 hours postoperatively in cardiac surgery, this is to prevent deep and superficial sternal wound infection and is not relevant to our discussion of TJA surgery in a patient with a preexisting heart valve.26,27 Interestingly, there have been some studies showing an increase in the routine use of vancomycin for routine valve surgery prophylaxis over the past years. Haydon et al. reviewed the national practice patterns for antibiotic prophylaxis in cardiac surgery in Australia and found that between 2004 and 2008, there was a doubling in the proportion of cardiac units using vancomycin for routine prophylaxis from 31% to 62% (p < 0.001).28

**Question 4: What alternatives are available for routine prophylaxis when cephalosporins are not an option?**

**Consensus:** Currently teicoplanin and vancomycin are reasonable alternatives when routine antibiotic prophylaxis cannot be administered.

**Delegate Vote:** Agree: 73%, Disagree: 22%, Abstain: 5% (Strong Consensus)

**Justification:** Teicoplanin has proven to be an effective and safe prophylactic agent in prosthetic implant surgery in Europe but is not yet available in the US, Canada, or China.29-32 Due to the increased frequency of MRSA and MRSE infections in recent years, the prophylactic use of alternative antibiotics such as glycopeptides (vancomycin and teicoplanin) in hospitals where MRSA/MRSE are prevalent may be justified.33 As vancomycin is more difficult to administer and has a shorter half-life and poorer tolerability profile than teicoplanin, the latter may be a better choice in these settings.34 Teicoplanin is notable for having a long half-life (32-176 hours), low toxicity, and good tissue penetration, which allows it to achieve therapeutic concentrations in bone and surrounding soft tissues.33,35

Ceftaroline (fifth-generation cephalosporin) has the same spectrum of activity as ceftriaxone with additional MRSA activity. The US Food and Drug Administration and the European Medicines Agency have provided indications for the use of ceftaroline for treatment of complicated skin and soft tissue infections only and not for prophylaxis.

In one multicenter RCT, Periti et al. compared administration of a single dose of teicoplanin (400 mg intravenous [IV] bolus at time of anesthesia) versus that of five doses of cefazolin over a 24-hour period (2 g at induction and 1 g every 6 hours postoperatively) as prophylaxis in patients undergoing TJA. They randomized 846 patients and noted that six patients (1.5%) in the teicoplanin group and seven patients (1.7%) in the cefazolin group developed a surgical wound infection during their hospital stay, which was a nonsignificant difference. Additionally, a nonsignificant difference in adverse events was recorded in the two groups, with three (0.7%) of the teicoplanin patients and nine (2.1%) of the cefazolin patients.32

**Question 5A: What antibiotic should be administered in a patient with a known anaphylactic penicillin allergy?**

**Consensus:** In a patient with a known anaphylactic reaction to penicillin, vancomycin or clindamycin should be administered as prophylaxis**.** Teicoplanin is an option in countries where it is available.

**Delegate Vote:** Agree: 88%, Disagree: 10%, Abstain: 2% (Strong Consensus)

**Question 5B: What antibiotic should be administered in a patient with a known nonanaphylactic penicillin allergy?**

**Consensus:** In a patient with a reported nonanaphylactic reaction to penicillin, a second-generation cephalosporin can be used safely as there is limited cross-reactivity. Penicillin skin testing may be helpful in certain situations to clarify whether the patient has a true penicillin allergy.

**Delegate Vote:** Agree: 87%, Disagree: 9%, Abstain: 4% (Strong Consensus)

**Justification:** When patients present with a penicillin allergy, further information should be obtained to determine whether an immunoglobulin E (IgE)-mediated response (anaphylaxis) occurred. In patients with a documented IgE-mediated response to penicillin, third- and fourth-generation cephalosporins can be used. First- and second-generation cephalosporins with R1 side chains similar to that of penicillin (cefaclor, cefadroxil, cefatrizine, cefprozil, cephalexin, or cephradine) should be avoided; first- and second-generation cephalosporins with different R1 side chains can be given.

Vancomycin and clindamycin are recommended as alternative agents for patients who have a true type I β-lactam allergy, manifested by immediate urticaria, laryngeal edema, or bronchospasm.3 Clindamycin is a preferred alternative for persons with an established β-lactam allergy or with contraindications to its use and at institutions with low rates of MRSA infection. Clindamycin has good bioavailability and at 30 minutes after infusion has been shown to exceed the MICs for *S. aureus* in both animal and human cortical bone samples.36 However, clindamycin is a bacteriostatic agent. In addition, vancomycin alone has a relatively poor activity against *S. aureus* and clinical studies implicate that vancomycin as prophylaxis alone increases the risk for SSI. Therefore, a second agent should be considered (levofloxacin, moxifloxacin) in addition to vancomycin. 8

Cross-reactivity between penicillin and cephalosporin is overestimated and much lower than reported in earlier studies. The 10% estimate of risk of allergic reactions to cephalosporins in penicillin-allergic patients is based on data collected and reviewed in the 1960s and 1970s. It is due in large part to the widely referenced reviews of Dash and Petz, which reported allergic reactions in 7.7% and 8.1%, respectively, of penicillin-allergic patients (allergy was based on patient history) and only included first-generation cephalosporins and second-generation cefamandole. 37,38 The high cross-reactivity found in earlier studies may be due in part to contamination of the study drugs with penicillin during the manufacturing process.39,40 Moreover, the authors of the early studies had a broader definition of allergy and did not account for the fact that penicillin-allergic patients have an increased risk of adverse reactions to any medication.41,42 Skin testing in penicillin-allergic patients cannot reliably predict an allergic response to a cephalosporin, particularly to compounds with dissimilar side chains.43 However, skin testing may be useful in determining whether a true allergy to penicillin exists.44

Twenty-seven articles on the topic of the cross-reactivity of penicillin and cephalosporin were reviewed, of which two were meta-analyses, 12 were prospective cohorts, three were retrospective cohorts, two were surveys, and nine were laboratory studies. The authors demonstrated that penicillin has a cross-allergy with first-generation cephalosporins (OR = 4.8, 95% CI = 3.7-6.2) and a negligible cross-allergy with second-generation cephalosporins (OR = 1.1, 95% CI = 0.6-2.1). Moreover, laboratory and cohort studies indicate that the R1 side chain, not the β-lactam ring, is responsible for this cross-reactivity. The authors conclude that the overall cross-reactivity between penicillin and cephalosporin is lower than previously reported, at 10%, although there is a strong association between amoxicillin and ampicillin with first- and second-generation cephalosporins that share a similar R1 side chain. The overall cross-reactivity between penicillin and cephalosporin is approximately 1% in individuals who report a penicillin allergy and 2.55% in those with a confirmed penicillin allergy. For penicillin-allergic patients, the use of third- or fourth-generation cephalosporin or cephalosporins (such as cefuroxime and ceftriaxone) with side chains dissimilar to those of the offending penicillin carries a negligible risk of cross-allergy.45

A similar review of 44 articles on the evidence of cross-reactivity between cephalosporin and penicillin in human and animal studies supports the finding that cephalosporin can be safely prescribed to a patient with a non-life-threatening reaction to penicillin (including type I anaphylaxis, Stevens-Johnson syndrome, toxic epidermal necrolysis, and angioedema).46 The relative risk of an anaphylactic reaction to cephalosporin ranges from 1:1,000 to 1:1,000,000 and this risk is increased by a factor of 4 in patients with a history of penicillin allergy.47

Based on an analysis of nine articles that compare allergic reactions to a cephalosporin in penicillin-allergic and non-penicillin-allergic subjects, Pichichero et al. found that first-generation cephalosporins have a cross-allergy with penicillin, but cross-allergy is negligible with second- and third-generation cephalosporins. Specifically, a significant increase in allergic reactions to cephalothin (OR = 2.5, 95% CI, 1.1-5.5), cephaloridine (OR = 8.7, 95% CI = 5.9-12.8), and cephalexin (OR = 5.8, 95% CI = 3.6-9.2) and all first-generation cephalosporins plus cefamandole (OR = 4.8, 95% CI = 3.7-6.2) were observed in penicillin-allergic patients; no increase was observed with second-generation cephalosporin (OR = 1.1, 95% CI = 0.6-2.1) or third-generation cephalosporin (OR = 0.5, 95% CI = 0.2-1.1).41,42

In a retrospective cohort of 2933 patients who received a cephalosporin (usually cefazolin) during their procedure, including 413 who were allergic to penicillin, only one of the penicillin-allergic patients may have had an allergic reaction to the cephalosporin; and one of the non-penicillin-allergic patients developed a rash while the antibiotic was infused, requiring discontinuation of the antibiotic.48

In a large, retrospective review of 534,810 patients who received penicillin followed by a cephalosporin at least 60 days later, Apter et al. noted that a total of 3877 patients had an allergic-like event (ALE) after penicillin administration, but only 43 (1.1%) experienced a second ALE after receiving cephalosporin (unadjusted risk ratio [RR] = 10.0, 95% CI = 7.4-13.6). Interestingly, in a separate analysis reviewing sulfonamide antibiotics, 1.6% of penicillin-sensitive patients experienced a second ALE after receiving a sulfonamide (RR = 7.2, 95% CI = 3.8-12.5), suggesting that patients who are allergic to penicillin are at a higher likelihood of being allergic to other medications in general, not necessarily indicating that cross-reactivity had occurred.49

Park et al. performed a retrospective cohort study to determine whether patients with a penicillin allergy were at an increased risk of adverse drug reactions when administered cephalosporin. Eighty-five patients with a history of penicillin allergy and positive penicillin skin test and 726 patients with a history of penicillin allergy and a negative penicillin skin test were administered a first-generation cephalosporin. Five of 85 cases (6%) had an adverse drug reaction to cephalosporin compared to five of 726 (0.7%) of the control population (p = 0.0019). The rate of presumed IgE-mediated adverse drug reactions to the cephalosporin among the cases was two of 85 (2%) compared to one of 726 (0.1%) among the reference population (p = 0.03).50

**Question 6: What are the indications for administration of vancomycin?**

**Consensus:** Vancomycin should be considered for patients who are current MRSA carriers or have anaphylactic allergy to penicillins.

Consideration should be given to screening high-risk patients such as:

- Patients in regions with a high prevalence of MRSA.

- Institutionalized patients (nursing home residents, dialysis-dependent patients, and those who have been in the intensive care unit).

- Healthcare workers.

**Delegate Vote:** Agree: 93%, Disagree: 7%, Abstain: 0% (Strong Consensus)

**Justification:** The AAOS recommendation for the use of IV antibiotic prophylaxis in primary TJA, recommendation 2, states that “vancomycin may be used in patients with known colonization with MRSA or in facilities with recent MRSA outbreaks.”51 Similarly, the consensus position of the Medicare National Surgical Infection Prevention Project’s SIPGWW meeting was that “for patients with known MRSA colonization, vancomycin should be considered the appropriate antimicrobial agent for prophylaxis.”6 Additionally, the Society for Healthcare Epidemiology of America recently recommended routine surveillance cultures at the time of hospital admission for patients at high risk for carriage of MRSA.52

**Question 7: Is there evidence to support the routine use of vancomycin for preoperative prophylaxis?**

**Consensus:** No. Routine use of vancomycin for preoperative prophylaxis is not recommended.

**Delegate Vote:** Agree: 93%, Disagree: 6%, Abstain: 1% (Strong Consensus)

**Justification:** Current data suggest that the role of vancomycin in orthopaedic surgery prophylaxis should be limited. There is ample evidence that vancomycin is inferior against methicillin-sensitive strains of staphylococcal species when compared to cephalosporin and penicillinase-resistant penicillin.8,53

Several systematic analyses concluded that no clear benefit in clinical or cost effectiveness has been demonstrated for the routine use of vancomycin compared with cephalosporin for prophylaxis. However, most of these studies were conducted before the increasing prevalence of MRSA and may not accurately reflect the current environment. In some hospitals, community-associated MRSA strains are now responsible for a significant portion of SSIs.54,55 However, there is no consensus about what constitutes a high prevalence of methicillin resistance and no evidence that routine use of vancomycin for prophylaxis in institutions with perceived high risk of MRSA infection results in fewer SSIs than the use of a cephalosporin. Although two RCTs have been conducted in institutions with a high MRSA prevalence, the differences in SSI rates and outcomes were conflicting. Similarly, several studies have utilized decision analysis models to calculate MRSA prevalence thresholds for which vancomycin would have clinical benefit and be more cost-effective than cephalosporin for surgical prophylaxis. However, these studies all suffer from the lack of randomization to provide baseline probabilities for the clinical effectiveness of each treatment at different rates of MRSA prevalence.

While there is a growing body of evidence to support the routine use of vancomycin for preoperative prophylaxis, this should be tempered by the fact that there is an increasing threat of colonization and infection with vancomycin-resistant enterococci(VRE)56 and an increased prevalence of MRSA strains with reduced susceptibility to vancomycin.57 58

The choice of drug prophylaxis should take into account the antibiotic resistance patterns in hospital systems. In a recent study by Fulkerson et al., the susceptibilities of *S. epidermidis* and *S. aureus* to cefazolin at two high-volume academic centers in New York, NY, USA, and Chicago, IL, USA, were only 44% and 74%, respectively.59 Of the most common organisms infecting patients undergoing TJA at these hospitals, 26% to 56% were resistant to the standard recommended prophylactic agent. Thirty-three of the 194 infections were diagnosed within a month after the surgery. Of these, eight were due to *S. epidermidis* and 16 were due to *S. aureus*. Of these, only two of the eight (25%) of the *S. epidermidis* infections and 11 of the 16 (69%) of the *S. aureus* infections were sensitive to cefazolin. However, these infections were 100% susceptible to vancomycin.

In a study of deep infections following hip and knee arthroplasty over a 15-year period at The Royal Orthopaedic Hospital and Queen Elizabeth Hospital in England, 22 of 75 hip and knee infections (29%) were caused by microorganisms that were resistant to the antibiotic used for prophylaxis (cefuroxime). These included all 3 MRSA infections, all three *Pseudomonas aeruginosa* infections, and 11 coagulase-negative *Staphylococcus* infections.60,61 Wiesel and Esterhai recommend administration of vancomycin in institutions where the prevalence of MRSA is > 10%-20%.62

In a hospital with a high prevalence of MRSA, Merrer et al. conducted a prospective, observational study comparing the incidence of SSI after vancomycin or cefazolin prophylaxis before femoral neck fracture surgery, as well as the impact of antibiotic prophylaxis on the emergence of VRE and *Staphylococcus aureus*. The authors found no significant difference in the rate of SSI, as a total of eight (3%) occurred, 4% in the cefazolin group and 2% in the vancomycin group (p = 0.47). At 1 week after surgery, there were a total of six patients (2%) who had hospital-acquired MRSA, corresponding to 0.7% in the cefazolin group and 5% in the vancomycin group (p = 0.04), none of which were resistant to glycopeptides. Additionally, three patients (1%) acquired VRE, all of which were in the cefazolin group (p = 0.27).63

Cranny et al. used a combination of systematic reviews and economic modeling to answer questions about whether there is a level of MRSA prevalence at which a switch from nonglycopeptide to glycopeptide antibiotics for routine prophylaxis is indicated in surgical environments with a high risk of MRSA infection. The effectiveness reviews identified 16 RCTs with a further three studies included for adverse events only. They found no evidence to support that glycopeptides are more effective than nonglycopeptides in preventing SSI. Most of the trials did not report either the baseline prevalence of MRSA at the participating surgical units or MRSA infections as an outcome. The cost-effectiveness review included five economic evaluations of glycopeptide prophylaxis. Only one study incorporated health-related quality of life and undertook a cost-utility analysis. In conclusion, the authors indicate that there is currently insufficient evidence to determine whether there is a threshold prevalence of MRSA at which switching from nonglycopeptide to glycopeptide antibiotic prophylaxis might be cost-effective.64

Bolon et al. performed a meta-analysis of seven RCTs published in the cardiothoracic surgery literature that compared SSIs in subjects receiving glycopeptide prophylaxis with those who received β-lactam prophylaxis. While neither agent proved to be superior for prevention of the primary outcome, occurrence of SSI at 30 days (RR = 1.14, 95% CI = 0.91-1.42), vancomycin prophylaxis was superior for the prevention of SSI caused by methicillin-resistant gram-positive bacteria (RR = 0.54; 95% CI = 0.33-0.90) at 30 days after surgery.65

The AAOS recommendations for the use of IV antibiotic prophylaxis in primary TJA, recommendation 2, states that “vancomycin may be used in patients with known colonization with MRSA or in facilities with recent MRSA outbreaks.”1 The Hospital Infection Control Practices Advisory Committee guideline also suggests that a high frequency of MRSA infection at an institution should influence the use of vancomycin for prophylaxis but acknowledges that there is no consensus about what constitutes a high prevalence of methicillin resistance.66

Two prospective RCTs have evaluated antibiotic prophylaxis in hospitals with a high prevalence of MRSA. Tacconnelli et al. randomized patients undergoing surgery for cerebrospinal shunt placement to receive either vancomycin or cefazolin. The prevalence of MRSA in 2001 for a 1700-bed university hospital was reported as one new case of MRSA infection per 100 hospital admissions. Shunt infections developed in 4% of patients receiving vancomycin (four of 88) and 14% receiving cefazolin (12 of 88) (RR = 0.22, 95% CI = 0.11-0.99; p = 0.03). The infecting pathogen was MRSA in two of four patients (50%) receiving vancomycin and nine of 12 patients (75%) receiving cefazolin.67 Finkelstein et al. randomized 855 patients undergoing cardiothoracic surgery to either a vancomycin or cefazolin group. The prevalence of new cases of MRSA infection in the cardiac surgery ward was reported to be 3.0 and 2.6 per 100 admissions in 1995 and 1996, respectively. The overall rates of SSI were similar in both groups (9.5% for vancomycin and 9.0% for cefazolin). A trend toward more methicillin-resistant gram-positive infections was observed in the cefazolin group (4.2% versus 2.0%; p = 0.09), while more methicillin-sensitive *Staphylococcus* infections were seen in patients receiving vancomycin (3.7% versus 1.3%; p = 0.04).68

Three other clinical studies have used pre- and postintervention periods to assess the effect of switching to vancomycin for surgical prophylaxis in patients undergoing cardiothoracic or orthopaedic surgery. Garey et al. demonstrated that a change from cefuroxime to vancomycin prophylaxis decreased the average monthly SSI rate by 2.1 cases/100 coronary artery bypass graft (CABG) procedures when compared with patients undergoing cardiac valve replacement surgery. This was attributed to a lower rate of infections caused by MRSA and CNS during this 4-year study of nearly 6500 patients.69 Similarly, Spelman et al. reported a decrease in SSI rates from 10.5% to 4.9% (p < 0.001) after switching the antibiotic prophylaxis regimen from cefazolin to vancomycin plus rifampin in 1114 CABG procedures. This was attributed to a decrease in the incidence of MRSA infections from 67% during the 1-year preintervention period to 0% in the 1-year postintervention period.70 Smith et al. retrospectively reviewed total and MRSA PJI in 5,036 primary TJAs as well as the cure rate of PJI in a 2-year preintervention period when cefazolin was the antibiotic prophylaxis of choice to the 2-year postintervention period when vancomycin was the antibiotic prophylaxis of choice. They found that with the use of vancomycin the total rate of PJI was significantly reduced (1.0% versus 0.5%; p = 0.03) and the rate of MRSA PJI was also reduced (0.23% versus 0.07%; p = 0.14). Furthermore, PJIs were more successfully treated with irrigation and debridement only, not requiring antibiotic spacers (76.9% versus 22.2%; p = 0.002).71

A study published on Australian Surveillance Data (Victorian Healthcare Associated Surveillance System) of more than 20,000 cardiac and arthroplasty procedures identified 1610 case in which vancomycin was administered as compared to 20,939 cases in which a β-lactam was used. The adjusted OR for an SSI with methicillin-sensitive *Staphylococcus aureus* (MSSA) was 2.79 (95% CI = 1.6-4.9) when vancomycin prophylaxis was administered (p < 0.001), whereas the unadjusted OR for an SSI with MRSA was 0.44 (OR = 0.19-1.004; p = 0.05).72

Several recent studies have developed decision analysis models to determine the threshold of MRSA prevalence at which vancomycin would minimize the incidence and cost of SSI. For CABG surgery, the authors of two studies have recommended a MRSA prevalence threshold of 3% among infections caused by *S. aureus*.73-75 Miller et al. suggested that lower rates of MRSA prevalence (eg, 3%-10%) were within the error of their model and that surgical prophylaxis with vancomycin would have a modest effect in reducing the incidence of SSI. For vascular surgery, a MRSA prevalence of 50% was suggested before a β-lactam agent is replaced with vancomycin for surgical prophylaxis.76 The authors also suggested that an aminoglycoside should be added to the prophylactic regimen once the prevalence of MRSA reaches 10%, which is in agreement with the recent guidelines from the British Society of Antimicrobial Chemotherapy.77 Elliot et al. developed an economic model to explore the cost-effectiveness of vancomycin and/or cephalosporin for surgical prophylaxis in patients undergoing THA. Vancomycin was recommended when the rate of MRSA SSIs is ≤ 0.15% and the rate of non-MRSA SSIs is ≥ 0.1%, or when the rate of MRSA infections is ≤ 0.2% and the rate of other infections is > 0.2%.78 Each of these decision analysis studies noted that their biggest limitation was the lack of available evidence from RCTs, with a high prevalence of MRSA infections as one of the most important factors that influenced modeling assumptions.

**Question 8: Is there a role for routine prophylactic use of dual antibiotics (cephalosporins and aminoglycosides or cephalosporins and vancomycin)?**

**Consensus:** Routine prophylactic use of dual antibiotics is not recommended.

**Delegate Vote:** Agree: 85%, Disagree: 14%, Abstain: 1% (Strong Consensus)

**Justification:** Clinical studies have used pre- and postintervention periods to assess the effect of switching to vancomycin for surgical prophylaxis in patients undergoing cardiothoracic surgery. Walsh et al. implemented a comprehensive MRSA bundle program in which vancomycin was added to the routine cefazolin prophylaxis regimen for patients who tested positive for nasal MRSA carriage. Other components of the program included decolonization of all cardiothoracic staff who screened positive for nasal MRSA, application of nasal mupirocin ointment for 5 days in all patients starting 1 day before surgery, application of topical mupirocin to exit sites after removal of chest and mediastinal tubes, and rescreening of patients for MRSA colonization at the time of hospital discharge. This program resulted in a significant reduction in the SSI rate (2.1%-0.8%, p < 0.001) as well as a 93% reduction in postoperative MRSA wound infections (from 32 infections/2767 procedures during the 3-year preintervention period to 2 infections/2496 procedures during the 3-year postintervention period).79

Dhadwal et al. conducted a double-blind RCT to compare the efficacy of a 48-hour, weight-based dosing of vancomycin plus gentamicin and rifampin versus a 24-hour cefuroxime regimen for antibiotic prophylaxis of sternal wound infections in a high-risk group of patients undergoing CABG surgery. The infection rates significantly decreased from 23.6% (25 of 106) in the cefuroxime group to 8.4% (eight of 95) in the combination vancomycin group (p = 0.004).80 Patrick et al. conducted an RCT to compare cefazolin and combinations of cefazolin and either vancomycin or daptomycin in 181 low-risk patients undergoing vascular surgery. Only 6 postoperative MRSA infections were reported (two in the cefazolin group, four in the vancomycin plus cefazolin group, and none in the daptomycin plus cefazolin group), making the interpretation of the differences between antibiotic regimens difficult.81

Sewick et al. retrospectively reviewed 1828 primary TJAs that received either a dual antibiotic regimen of cefazolin and vancomycin or received cefazolin alone in order to determine the rate of SSI as well as the microbiology of subsequent SSI. There was a total of 22 SSIs (1.2%) with no significant difference in the infection rate between the dual antibiotic prophylaxis group compared to the single antibiotic regimen (1.1% and 1.4%, respectively; p = 0.636), while the prevalence of subsequent MRSA infection was significantly lower (0.002% versus 0.08%; p = 0.02).82 Ritter et al. administered a single prophylactic dose of vancomycin and gentamicin in a cohort of 201 consecutive TJA patients and documented bactericidal blood concentrations during and for 24 hours after surgery with no postoperative infections.83

Elliot et al. developed an economic model to explore the cost effectiveness of vancomycin and/or cephalosporin for surgical prophylaxis in patients undergoing THA. Combination therapy (such as vancomycin plus a cephalosporin) was recommended when the rate of MRSA SSIs is ≥ 0.25% and the rate of non-MRSA SSIs is ≥ 0.2%.78

Thus, based on the available literature, this workgroup feels that dual antibiotics may be utilized to allow broad coverage in institutions or regions where there is a high rate of MRSA infection for which prophylactic vancomycin use is deemed appropriate under Question 6 above.

**Question 9: What should be the antibiotic of choice for patients with abnormal urinary screening and/or an indwelling urinary catheter?**

**Consensus:** The presence of urinary tract symptoms should trigger urinary screening prior to TJA. Asymptomatic patients with bacteriuria may safely undergo TJA provided that routine prophylactic antibiotics are administered. Patients with acute urinary tract infections (UTI) need to be treated prior to elective arthroplasty

**Delegate Vote:** Agree: 82%, Disagree: 12%, Abstain: 6% (Strong Consensus)

**Justification:** There is sparse literature on the risk of deep joint infection in patients with abnormal perioperative urinalysis. While several case reports in the 1970s linked postoperative UTIs to PJI,84 85 the literature supporting the correlation between preoperative UTIs and PJI following TJA is inadequate.86 Only 3 studies have directly addressed the relationship between preoperative bacteriuria and PJI following TJA, none of which observed a positive correlation.87-89 To our knowledge there are no studies of patients with symptomatic UTI undergoing TJA with routine perioperative prophylactic antibiotics. There is no evidence either in support of or against proceeding with surgery in this cohort of patients.

The presence of UTI symptoms should serve as a preliminary screening tool for surgical clearance of the TJA candidate. Symptoms can then be classified as either irritative or obstructive. Irritative symptoms (such as dysuria, urgency, or frequency) may or may not be related to bacteriuria and a noncentrifuged clean catch midstream urine sample should be evaluated for white blood cells (WBCs) in these patients. In patients with > 104 WBCs/mL, a bacterial count and culture should be obtained and in patients with > four WBCs/high-power field and bacterial count > 103/mL, surgery should be postponed until an appropriate course of microbe-specific antibiotics is administered and repeat urinalysis is obtained. On the other hand, asymptomatic patients with bacteriuria may safely undergo TJA provided routine prophylactic antibiotics are administered. Patients with obstructive symptoms should undergo urologic evaluation before arthroplasty, as postoperative urinary retention has been shown to be a risk factor for PJI. 86,90,91

In a prospective, multicenter study of 362 knee and 2651 hip arthroplasty cases, the authors reported a deep joint infection rate of 2.5% for knee and 0.64% for hip cases at 1-year follow-up. While univariate analysis showed no association between deep joint infection and preoperative UTI (> 105 CFUs/mL), multivariate regression analysis indicated that postoperative UTI increased the risk of hip PJI.88

Of 1934 surgical cases (1291 orthopaedic surgeries) performed at a Veterans Administration hospital, a preoperative urine culture was obtained in 25% (489) of cases. Of these, bacteriuria was detected in 54 (11%) patients, of which only 16 received antimicrobial drugs. The incidence of SSI was similar between those with bacteriuria and those without (20% versus 16%; p = 0.56), while the rate of postoperative UTI was more frequent among patients with bacteriuria than those without (9% versus 2%; p = 0.01). Among the 54 patients with a positive urinary culture, treated and untreated patients were compared. Unexpectedly, a greater proportion of treated patients developed an SSI (45% versus 14%; p = 0.03). This effect was greatest among patients with high count bacteriuria (> 105 CFUs/mL), with SSI occurring in four of eight (50%) of treated versus one of 15 (7%) of untreated (p = 0.03). These results led the authors to conclude that in this system preoperative urinary cultures were inconsistently ordered and that when they were, they were rarely positive for bacteriuria. Even when bacteriuria was detected, it was usually not treated. The authors noted that treating bacteriuria associated with SSI is likely confounded by factors that contributed to the initial decision to administer antimicrobials in the first place.92

A retrospective study of 274 THAs found that five patients with PJI had perioperative UTIs. However, the same organism was isolated from the urinary tract and hip in only three patients. Of these, only one had a documented preoperative urinalysis.93 A retrospective analysis of 277 patients (364 TJAs) showed that 35 patients had evidence of preoperative or perioperative UTI with colony counts of > 105 CFUs/mL on preoperative clean-catch urine specimens. Only three patients (1.1%) developed joint infections at 9, 19, and 45 months, respectively, and none was thought to be due to perioperative UTI.87 Another retrospective analysis found 57 (55 asymptomatic, two symptomatic) of 299 arthroplasty patients had bacteriuria on admission. Twenty of the 57 patients went to surgery before the routine culture results were available, but postoperatively received appropriate antibiotics for treatment of the UTI. Another 18 patients underwent surgery during their treatment course for preoperatively diagnosed UTI, while the other 19 patients completed an appropriate antibiotic course prior to surgery. None of the patients developed a PJI, which led the authors to conclude that a treatment course of antibiotics can be implemented at any time perioperatively once culture data are obtained.89

The incidence of bacteriuria rises from 0.5% to 1% for a single in-and-out catheterization, 10% to 30% for catheters in place for up to 4 days, and up to 95% for catheters in place for ≥ 30 days.94,95

**Question 10: Should the preoperative antibiotic choice be different in patients who have previously been treated for another joint infection?**

**Consensus:** The type of preoperative antibiotic administered to a patient with prior septic arthritis or PJI should cover the previous infecting organism of the same joint. In these patients, we recommend the use of antibiotic-impregnated cement, if a cemented component is utilized.

**Delegate Vote:** Agree: 84%, Disagree: 10%, Abstain: 6% (Strong Consensus)

**Justification:** There is no evidence that septic arthritis or a PJI can be completely cured. Jerry et al. conducted a study of 65 patients who underwent TKA and had a history of prior sepsis or osteomyelitis around the knee. They reported rates of deep PJI of 4% and 15%, respectively.96

Lee et al. studied a consecutive series of 20 primary TKAs in 19 patients with a history of prior septic arthritis or osteomyelitis around the knee. They performed a preoperative workup to evaluate for infection that included serologies and plain radiographs in all patients, while 8 patients additionally had tagged WBC scans and seven patients had a knee aspiration. Intraoperatively, frozen section for evidence of acute inflammation was used to guide decisions on whether the procedure was done as a single or staged procedure. All TKA components were implanted with antibiotic cement containing 1 g vancomycin and 1.2 g tobramycin/batch of Simplex bone cement. Of the 17 patients with a minimum of 2 years’ follow-up, only one developed a PJI approximately 3.5 years from the index arthroplasty. Of note, this was one of the two patients that had been treated in a staged manner and additionally had immunosuppressive comorbidities, including rheumatoid arthritis, insulin-dependent diabetes mellitus, and was taking daily doses of prednisone.97

Larson et al. performed a retrospective matched case control study to review the clinical results of 19 patients who underwent TKA after infected tibial plateau fractures, comparing them to 19 control subjects matched for age, sex, and arthroplasty year, who underwent TKAs for tibial plateau fractures without a history of infection. Of the 19 case patients, 13 underwent one-stage TKA, while the remainder underwent a staged TKA with either an antibiotic spacer or debridement and intravenous antibiotic therapy. Antibiotic cement was used in the majority of patients. Previously infected knees were 4.1 times more likely to require additional procedures for complications compared with knees with no previous infection (95% CI = 1.2-18.3, p = 0.02). The 5-year infection-free survival was 73% ± 10% in the case group compared with 100% in the control group (p = 0.023). The authors recommended that in patients at high risk less than 1 year since active evidence of infection, a two-stage TKA be performed, with antibiotic therapy and a 4- to 6-week delay between procedures.98

**Question 11: Should postoperative antibiotics be continued while a urinary catheter or surgical drain remains in place?**

**Consensus:** No. There is no evidence to support the support the continued use of postoperative antibiotics when urinary catheter or surgical drains are in place. Urinary catheters and surgical drains should be removed as soon as safely possible.

**Delegate Vote:** Agree: 90%, Disagree: 7%, Abstain: 3% (Strong Consensus)

**Justification:** Short-term use of an indwelling catheter after surgery reduces the incidence of urinary retention and bladder overdistension without increasing the rate of UTI and is therefore common practice in many hospitals.99 However, it has been shown that there is an increased risk of UTIs when a catheter is employed for > 48 hours.100,101 Urinary retention as well as catheterization can both lead to bacteriuria,101-103 which increases the risk of deep PJI from three to six times.87,88,104,105

Literature in the field of surgical oncology demonstrates that bacterial colonization of surgical drains used in breast and axillary procedures is a significant risk factor for the development of SSI and the microorganisms that caused SSIs were the same as those that colonized the drainage tube in 83% of cases.106 Other studies have demonstrated that there is an association between longer duration of drain use and increased incidence of SSI.107

The AAOS recommendations for the use of IV antibiotic prophylaxis in primary TJA, recommendation 3, states that the “duration of prophylactic antibiotic administration should not exceed the 24-hour postoperative period. Prophylactic antibiotics should be discontinued within 24 hours of the end of surgery. The medical literature does not support the continuation of antibiotics until all drains or catheters are removed and provides no evidence of benefit when they are continued past 24 hours.”2

Colonization of drains by skin organisms can certainly occur, but in only 10% of cases with positive drain tip culture does overt infection develop.108 Michelson et al. conducted an RCT of 100 TJA patients using two methods of bladder management: short-term (< 24-hour) indwelling catheters and intermittent catheterization. All patients received the same perioperative cefazolin prophylaxis. The authors reported a lower incidence of urinary retention in the indwelling catheter group (27% versus 52%; p < 0.01) and a lower rate of bladder distension (7% versus 45%; p < 0.01). Moreover, patients who had an indwelling catheter for > 48 hours had a significantly higher rate of bladder infection (35%) than patients who were straight catheterized and/or who had an indwelling catheter for < 48 hours (6%) (p < 0.01).99

Van den Brand et al. performed a prospective RCT to determine whether an indwelling catheter for 48 hours or intermittent catheterization leads to less postoperative bacteriuria or a UTI with a single dose of cefazolin prophylaxis in primary hip and knee arthroplasties. In their protocol, patients received 48 hours of IV prophylactic cefazolin during the postoperative period. Patients who had an indwelling catheter in place after the IV antibiotics were completed were treated with oral antibiotic prophylaxis (nitrofurantoin) until catheter removal. Of the 99 patients who completed the study, 14 patients (five men, nine women) developed postoperative bacteriuria. The indwelling catheter group had a bacteriuria rate of 24% (11 of 46) compared with 6% (three of 53) in the intermittent catheterization group (p = 0.018).109

Similar findings were reported by Oishi et al., who reviewed 95 consecutive patients who had been managed with either an indwelling catheter (72 hours) or intermittent catheterization. Patients who were treated with an indwelling catheter had significantly lower incidences of urinary retention (7% versus 84%, respectively; p < 0.005) and bladder distension (7% versus 41%; p < 0.005) than those who were treated with straight catheterization. While not statistically significant, though no patient in the indwelling catheter group developed infection, in the intermittent catheterization group one patient (2%) had bacteriuria and one patient (2%) had a UTI (p > 0.1).110

Koulouvaris et al. performed a retrospective case control study to determine whether a treated preoperative or postoperative UTI or asymptomatic bacteriuria increases the risk of deep PJI and whether the organisms are the same for the UTI and PJI. The authors matched 58 patients who had wound infections with 58 patients who did not develop wound infection based on age, sex, surgeon, joint, year of surgery, and length of follow-up. The authors found no association between preoperative UTI and wound infection (OR = 0.34, 95% CI = 0.086-1.357; p = 0.13), and no association between postoperative UTI and wound infection (OR = 4.22, 95% CI = 0.46-38.9; p = 0.20). Only one patient had the same bacteria (*E. faecalis*) cultured in the urine and the wound.111

In a survey of the members of the American Society of Breast Surgeons regarding the use of perioperative antibiotics for breast operations requiring drains, respondents continued antibiotic prophylaxis for 2-7 days or until all drains were removed (38% and 39%, respectively) in cases without reconstruction, while in reconstruction cases 33% of respondents continued antibiotic prophylaxis for 2-7 days or until all drains were removed.112 A similar study surveying the American and Canadian societies of Plastic Surgeons regarding drain use and perioperative antibiotic prophylaxis in cases of breast reconstruction found that 72% of plastic surgeons prescribed postoperative outpatient antibiotics in reconstruction patients with drains, with 46% continuing antibiotics until drains were removed.113

**Question 12: What is the evidence for the optimal duration of postoperative antibiotics in decreasing SSI or PJI?**

**Consensus:** Postoperative antibiotics should not be administered for > 24 hours after surgery.

**Delegate Vote:** Agree: 87%, Disagree: 10%, Abstain: 3% (Strong Consensus)

**Justification:** Many studies across surgical specialties have been performed to compare durations of antibiotic prophylaxis and the overwhelming majority have not shown any benefit in antibiotic use for > 24 hours in clean elective cases.114-116 Prolonged postoperative prophylaxis should be discouraged because of the possibility of added antimicrobial toxicity, selection of resistant organisms, and unnecessary expense.24

The AAOS recommendations for the use of IV antibiotic prophylaxis in primary TJA, recommendation 3, states that “duration of prophylactic antibiotic administration should not exceed the 24-hour postoperative period. Prophylactic antibiotics should be discontinued within 24 hours of surgery.”1

Mcdonald et al. performed a systematic review across surgical disciplines to determine the overall efficacy of single versus multiple dose antimicrobial prophylaxis for major surgery. They included only prospective RCTs which used the same antimicrobial in each treatment arm whose results were published in English. Regardless of fixed models (OR = 1.06, 95% CI = 0.89-1.25) or random effects (OR = 1.04, 95% CI = 0.86-1.25), there was no significant advantage of either single or multiple dose regimens in preventing SSI. Furthermore, subgroup analysis showed no significant differences in the type of antibiotic used, length of the multiple dose arm (> 24 hours versus ≤ 24 hours), or type of surgery (obstetric-gynecological versus other).117

Mauerhan compared the efficacy of a 1-day regimen of cefuroxime with a 3-day regimen of cefazolin in a prospective, double-blinded, multicenter study of 1354 patients treated with arthroplasty and concluded that there was no significant difference in the prevalence of wound infections between the two groups. In the group treated with primary THA, the prevalence of deep wound infection was 0.5% (one of 187) for those treated with cefuroxime compared with 1.2% (two of 168) for those who had received cefazolin. In the group treated with a primary TKA, the rate of deep wound infection was 0.6% (one of 178) for those treated with cefuroxime compared with 1.4% (three of 207) for those who had received cefazolin.22

Heydemann and Nelson, in a study of hip and knee arthroplasty procedures, initially compared a 24-hour regimen of either nafcillin or cefazolin with a 7-day regimen of the same and found no difference in the prevalence of infection. They then compared a single preoperative dose with a 48-hour regimen and again found no difference in infection prevalence. A total of 466 procedures was performed during the 4-year study. No deep infections developed in either the one-dose or 48-hour antibiotic protocol group. A deep infection developed in one (0.8%) of the 127 patients in the 24-hour protocol group and in two (1.6%) of the 128 patients in the 7-day protocol group for an overall infection rate of 0.6% (three of 466). The authors recognized that as a result of the small sample sizes, the study lacked the power to compare the one-dose and the > one-dose categories.118

Stone et al. performed two separate prospective, placebo RCTs of variable-duration antibiotic prophylaxis in patients undergoing elective gastric, biliary, or colonic surgery and then in patients undergoing emergency laparotomy and found that in both cases no significant difference was seen in the rate of SSI. Specifically, in a prospective RCT of 220 patients undergoing elective general surgery who were randomized to either perioperative cefamandole plus 5 days of placebo or perioperative plus 5 postoperative days of cefamandole, there was no significant difference in the rate of wound infection (6% and 5%, respectively). In a second prospective RCT of patients undergoing emergent laporatomy in which cephalothin was utilized perioperatively, there was no significant difference in the rate of peritoneal infection between those who received perioperative therapy only (8% and 4%, respectively) compared to those who had 5-7 days of additional postoperative therapy (10% and 5%, respectively).119

In a retrospective review of 1341 TJAs, Williams and Gustilo found no difference in deep infection rates between a 3-day and 1-day course of prophylactic antibiotics but emphasized the importance of the preoperative dose, which was 2 g cefazolin.120

Clinical studies have used pre- and postintervention periods to assess the effect of antibiotic duration for surgical prophylaxis. One institution launched a surgical wound infection surveillance program to monitor all orthopaedic surgeries and changed the prophylactic antibiotic regimen from intravenous cefuroxime (one preoperative and two postoperative doses every 8 hours) to one single preoperative dose of intravenous cefazolin for all clean orthopaedic surgeries. The authors of this study found no significant difference in the superficial and deep wound infection rates in 1367 primary arthroplasties performed with a single preoperative dose of cefazolin versus three doses of cefuroxime. The deep wound infection rate for THA was 1.1% (95% CI, 0%-3.3%) in the cefuroxime group and 1.1% (95% CI = 0%-2.2%) in the cefazolin group (p = 1.0). The deep wound infection rate of TKA was 1.6% (95% CI, 0%-3.8%) in the cefuroxime group and 1.0% (95% CI = 0.3%-1.7%) in the cefazolin group (p = 0.63).121

**Question 13: Until culture results are finalized, what antibiotic should be administered to a patient with a presumed infection?**

**Consensus:** In a patient with a presumed infection when culture results are pending, empiric antibiotic coverage should depend on the local microbiological epidemiology. Culture data should assist in the tailoring of antibiotic regimens.

**Delegate Vote:** Agree: 96%, Disagree: 1%, Abstain: 3% (Strong Consensus)

**Justification:** Guidelines based on individual institutional microbiological epidemiology should be developed.124 In the US, vancomycin is recommended for gram-positive coverage due to a high rate of resistance to methicillin in many cases and gentamicin or a third- or fourth-generation cephalosporin is recommended for gram-negative coverage. However, in areas with low MRSA prevalence, vancomycin should not be recommended as the first choice of drug until culture results are obtained and other antibiotics should be chosen instead.

Sharma et al. classified the spectrum and antibiotic susceptibility of bacteria isolated from revision hip and knee arthroplasty specimens in order to recommend appropriate empiric perioperative antibiotics before definitive cultures are obtained. They identified 147 patients with positive specimens, yielding 248 microorganisms from 195 tissue specimens, 43 fluid specimens, and 10 swabs. Of the 248 isolated microorganisms, *Staphylococcus* species was the most common genus encountered (53%), followed by gram-negative isolates (24%). Eighty-eight percent of gram-negative organisms were detected within 48 hours of inoculation and 94% of gram-positive organisms within 96 hours. Overall, 46% of isolates were susceptible to cephalothin, while only 35% of CNS were sensitive to cephalothin. No gram-positive vancomycin resistance was encountered. Therefore the authors concluded that empiric prophylactic antibiotics for revision hip and knee arthroplasty should include vancomycin for gram-positive organisms and gentamicin for gram-negative bacteria; and if infection is suspected, vancomycin and gentamicin should be continued postoperatively for 96 and 48 hours, respectively, unless culture or histology results suggest otherwise.122

Knee: In a retrospective review of 121 patients who underwent revision TKA for infection between 1994 and 2008 in the United Kingdom, the most common organism was CNS (49%) and *S. aureus* (13%). The prevalence of CNS appears to be increasing, while that of *S. aureus* and other organisms is decreasing. Vancomycin and teicoplanin were the most effective antibiotics, with overall sensitivity rates of 100% and 96%, respectively. Also, the authors reported that based on their theoretical model of comparing microorganism sensitivities against specific antibiotics, gentamicin combined with vancomycin or teicoplanin is the most effective empirical regimen. While the authors recognized the potential serious nephrotoxic side effects, these antibiotics may be added to bone cement relatively safely. The authors also suggested that this empirical regimen can potentially allow for a one-stage revision procedure to be conducted when deep infection arises.123

In early, delayed, and late infections observed from data from the SKAR from 1986 to 2000 in 426 surgically revised cases, CNS was most prevalent (105 of 299, 35.1%) and twice as common as *S. aureus* (55 of 299, 18.4%). In hematogenous infections, *S. aureus* was the dominating pathogen (67 of 99, 67.7%), followed by streptococci and gram-negative bacteria. Methicillin resistance was found in one of 84 tested isolates of *S. aureus* and 62 of 100 tested isolates of CNS. During the study period from 1986 to 2000, methicillin resistance among CNS increased (p = 0.002). Gentamicin resistance was found in one of 28 tested isolates of *S. aureus* and 19 of 29 tested CNS isolates. Therefore, the authors conclude that empiric antibiotics should cover CNS, as most early infections were caused by this organism. They also raised the concern that due to high rate of gentamicin resistance among CNS in infected TKA, other antibiotics should be used in bone cement at revision.23

Data from the SKAR have previously been used to report on the microbiology of 357 TKA infections in patients operated on before 1986. *S. aureus* was the most common pathogen (45.4%) followed by CNS (18%).124 In later studies, staphylococci continued to be the most common pathogens, with *S. aureus* reported to account for 13%-51% of the infections and CNS accounting for 15%-49%.123,125,126

Hip: Rafiq et al. retrospectively reviewed the microbiology of 337 one-stage revision hip replacements for deep infection and found that CNS was the predominant organism (67%) and that *Staphylococcus* (13%) is becoming more prevalent. The authors also noted an increase in antimicrobial resistance (24% resistance to gentamicin), which lead the authors to suggest that other antibiotics such as erythromycin or fusidic acid be added to bone cement during these procedures.127

In a study examining the microbiology of contaminating bacteria during primary THA, Al-Maiyah et al. cultured the gloved hands (n = 627 impressions) of the surgical team in 50 THA cases after draping, at 20-minute intervals, and then before cementation. They found contamination present in 57 (9%) of impressions and a total of 106 bacterial isolates, with CNS being the most frequent (68.9%), micrococcus (12.3%) and diptheroids (9.4%) following, and *S. aureus* only representing 6.6% of cases. Interestingly, only half (52%) of the CNS isolates were sensitive to cefuroxime, the institutional prophylactic agent of choice, suggesting alternate agents may be indicated.128

Phillips et al. reviewed the microbiology of deep infection following hip and knee arthroplasty at a specialist orthopaedic hospital in the United Kingdom over a 15-year period. At their institution, CNS was the most common infecting organism (36%), followed by *S. aureus* (25%), *Enterococcus* (9%), and MRSA (4%). Of the infecting organisms, 72% were sensitive to routine prophylactic agents. There was no significant change in microbiology over that time period at this institution.129

Timing of Infection: A retrospective analysis of 146 patients who had a total of 194 positive cultures obtained at time of revision total hip or knee arthroplasty was performed. Seventy percent of the infections were classified as chronic, 17% as acute postoperative, and 13% as acute hematogenous. Gram-positive organisms caused the majority of the infections (168 of 194, 87%). The microorganisms were sensitive to cefazolin in 61% of cases, gentamicin in 88% of cases, and vancomycin in 96% of cases. The most antibiotic-resistant bacterial strains were from patients in whom prior antibiotic treatment had failed. Acute postoperative infections had a greater resistance profile than did chronic or hematogenous infections. Bacteria isolated from a hematogenous infection had a high sensitivity to both cefazolin and gentamicin. This led to the following recommendations:

- Until final cultures are available, acute hematogenous infections should be treated with cefazolin and gentamicin.
- All chronic and acute postoperative infections with gram-positive bacteria and all cases in which a gram stain fails to identify bacteria should be managed with vancomycin.
- Infections with gram-negative bacteria should be managed with third- or fourth-generation cephalosporin.
- Infections with mixed gram-positive and gram-negative bacteria should be managed with a combination of vancomycin and third- or fourth-generation cephalosporin.
- As 93% (180) of the 194 cultures tested positive by the fourth postoperative day, the authors recommend that if culture results are not positive by the fourth postoperative day, termination of empiric antibiotic therapy should be considered.59

In a retrospective review of 97 patients (106 infections in 98 hips), Tsukayama et al. noted that aerobic gram-positive cocci accounted for 109 (74%) of the 147 isolates; gram-negative bacilli, 21 (14%); and anaerobes, 12 (8%). Of the CNS species 27 (48%) were oxacillin-resistant, while all 33 (100%) of the coagulase-positive *Staphylococcus* species were sensitive to oxacillin. The authors noted that most of the gram-negative isolates came from the early postoperative and late chronic infections, while isolates from the acute hematogenous infections were exclusively gram-positive cocci.130

Irrigation and Debridement (I&D): Aretrospective review was conducted to describe the microbiological spectrum of PJI in 112 patients managed with I&D or arthroscopic washout of infected prosthetic joints between 1998 and 2003 in order to guide the choice of empirical antibiotics. Overall, the most frequently isolated organisms were CNS (47%) and methicillin-sensitive *Staphylococcus aureus* (MSSA) (44%), while 8% were MRSA and 7% were anaerobes. In their series, 60% of CNS isolates were resistant to methicillin. Most gram-negative isolates were resistant to cefuroxime and all were sensitive to meropenem. Based on the high rate of early polymicrobial infection, cephalosporin resistance among gram-negative organisms, β-lactamase resistance among gram-negative organisms, and β-lactam resistance among CNS, the authors recommend glycopeptides with a carbapenem in the initial regimen, with modification when culture and sensitivity results are available.131

**Question 14: What is the appropriate preoperative antibiotic for a second-stage procedure?**

**Consensus:** The appropriate preoperative antibiotic for the second stage should include coverage of the prior organism(s). Cemented arthroplasty components should be inserted with antibiotic-laden bone cement.

**Delegate Vote:** Agree: 66%, Disagree: 31%, Abstain: 3% (Strong Consensus)

**Justification:** Patients undergoing reimplantation surgery following a two-stage exchange procedure are at risk of developing recurrent infection.132,133 The recurrent infection may be either due to incomplete eradication of the prior bacteria during the antibiotic spacer exchange or to a new infection. In order to properly address both potential scenarios, the appropriate preoperative antibiotics should include coverage of the prior organism as well as the most common infecting microorganisms.

Antibiotic-laden bone cement has been shown to decrease septic failure following TJA in high-risk individuals and it is US Food and Drug Administration-approved for use during reimplantation of components in a two-stage exchange. While there is no evidence to support the practice, it makes theoretical sense to add antibiotics that are effective in treating the index infection.

In a systematic review of 31 studies that compared the clinical outcomes achieved with one- and two-stage revision TKA with different types of spacers, the authors noted that after the index revision for infection, deep joint infection was detected in 0%-31% of cases. Of these, the infection was considered recurrent in 0%-18% of cases, while new infection rates varied from 0% to 31%. While the length of follow-up did not appear to influence the rate of recurrent infections, the studies with < 4 years of clinical follow-up had fewer new infections.134

Azzam et al. retrospectively reviewed 33 patients who had failed an initial two-stage exchange arthroplasty, of whom 18 eventually went on to undergo a second two-stage procedure. Of this cohort, the isolated organism was different from the previous infecting organism in only one of 18 patients.132

In a similar study, Kalra et al. retrospectively reviewed 11 patients who developed reinfection after two-stage revision for infected THA and were subsequently treated with a two-stage rerevision. In their series, the infecting microorganisms were polymicrobial in three patients and only two had reinfection by the initial offending microbe.133

In a review of the outcomes of 69 patients with PJI in TKA, Mont et al. determined that in eight of nine reinfections were from the organism that had caused the initial infection, although in six of the eight patients the sensitivity of the organism to antibiotics had changed.126

Kubista et al. published results on 368 patients treated with a two-stage revision for infected TKA. Of this cohort, 58 (15.8%) developed reinfection and a causative organism was identified in 47 of 58 (81%) of patients.135

In a retrospective review of 117 patients who underwent two-stage exchange arthroplasty for PJI of the knee, 33 of 117 patients (28%) required reoperation for infection. At the time of reimplantation, antibiotic-laden bone cement (1.2 g tobramycin and 1 g vancomycin per 40 g cement) was used for fixation of the prosthesis, but there was no note of the parenteral or perioperative antibiotics utilized at the second stage.136

**Question 15: For surgeries of longer duration, when should an additional dose of antibiotic be administered intraoperatively?**

**Consensus:** An additional dose of antibiotic should be administered intraoperatively after two half-lives of the prophylactic agent. The general guidelines for frequency of intraoperative antibiotic administration are provided. We recommend that redosing of antibiotics be considered in cases of large blood volume loss (> 2000 mL) and fluid resuscitation (> 2000 mL). As these are independent variables, redosing should be considered as soon as the first of these parameters are met.

**Delegate Vote:** Agree: 94%, Disagree: 5%, Abstain: 1% (Strong Consensus)

**Justification:** In cases of large blood volume loss and fluid resuscitation, there is a remarkable loss of the prophylactic agent that can result in levels below the MIC. The same is true for longer surgeries that extend beyond the half-life of the agent. Thus, additional antibiotic treatment is needed to reestablish antibiotic levels that exceed the MIC. An additional dose of antibiotic has been shown to reduce SSI rates in cardiac patients and should be administered intraoperatively after two half-lives of the prophylactic agent.3,74,75

The AAOS recommendations for the use of IV antibiotic prophylaxis in primary TJA, recommendation 2, states that “timing and dosage of antibiotic administration should be such to optimize the efficacy of the therapy.”1 Both the IDSA and AAOS state: “Additional intraoperative doses of antibiotic are advised when the duration of the procedure exceeds one to two times the antibiotic’s half-life or when there is significant blood loss during the procedure.” The general guidelines for frequency of intraoperative antibiotic administration are as follows: cefazolin every 2-5 (4) hours, cefuroxime every 3-4 hours, clindamycin every 3-6 hours, isoxazolylpenicillin every 3 hours, and vancomycin every 6-12 hours.2,137,138

In a prospective multicenter study exploring the relationship between timing, duration, and intraoperative redosing of surgical antimicrobial prophylaxis and the risk of SSI, Steinberg et al. determined that intraoperative dosing was associated with a lower infection risk only when the preoperative antibiotic was given in the recommended time frame. In 1062 (24%) cases, the surgical procedure lasted for at least 4 hours. Because of a longer half-life and the reduced need for redosing, cases that received vancomycin or fluoroquinolones were excluded from the analysis of the impact of redosing on infection risk (n = 372). Intraoperative redosing was given in 21% of 690 of these long operations. Of the group that had a surgical procedure with a duration of > 4 hours and who received the preoperative dose within 1 hour, two of 112 (1.8%) patients who were redosed intraoperatively developed infection, compared to 22 of 400 (5.5%) of those who were not redosed (OR = 3.08, p = 0.06).10

Scher et al. randomized 801 patients undergoing clean contaminated operations to one of three antibiotic regimens: 1 g cefazolin preoperatively, 1 g cefazolin preoperatively and another dose 3 hours later, and 1 g cefotetan preoperatively. While all regimens demonstrated similar wound infection rates for surgeries lasting < 3 hours, for those that exceeded 3 hours, the group that only received the single preoperative cefazolin dose had a statistically significant higher wound infection rate than those who received the second cefazolin dose (6.1% versus 1.3%; p < 0.01).139

Shapiro et al. performed a placebo-controlled RCT to test the efficacy of perioperative cefazolin in preventing infection after abdominal or vaginal hysterectomy. The authors subanalyzed the effect of surgery duration on the efficacy of perioperative prophylaxis by calculating adjusted relative odds of infection with and without prophylaxis for different durations of surgery and found that the efficacy of prophylaxis diminishes rapidly with increasing length of surgery; by 3 hours, 20 minutes of prophylaxis had no measurable effect (OR = 1).140

Polk et al. prospectively analyzed the antibiotic levels of three cephalosporins (cefazolin, cephaloridine, and cephalothin) given as a single preoperative dose and found that acceptable concentrations of cefazolin were maintained near the incision site until 3 hours postadministration, whereas cephalothin did not maintain wound levels consistent with effective antimicrobial activity.141

Ohge et al. prospectively examined the pancreatic tissue concentrations of cefazolin in 10 patients undergoing pancreatectomy and determined the optimal intraoperative time to repeat the dose of cefazolin. Based on their results, the authors recommended a second dose of Kefzol® be given 3 hours after first administration to maintain adequate levels of antibiotic activity. They measured MIC for four bacterial species, namely 360 isolates of MSSA, 204 isolates of *K.* *pneuomoniae*, 314 isolates of *E. coli*, and 30 isolates of streptococci species; and measured tissue levels of cefazolin. Antibiotic concentrations in adipose tissue and peritoneum 3 hours after administration of Kefzol® were lower than the MIC 80 for *K. pneumoniae*, *E. coli*, and streptococcal species.142

In a retrospective review of 131 patients with primary colorectal cancer in prolonged operations exceeding 4 hours, the surgical wound infection rates were 8.5% and 26.5%, respectively, for those with (n = 47) and without (n = 49) intraoperative repeated dosing, which were significantly different based on both a univariate (p = 0.031) and a multivariate analysis (p = 0.008).143

Zanetti et al. retrospectively compared the risk of SSIs in 1548 patients who underwent cardiac surgery lasting > 240 minutes after preoperative administration of cefazolin prophylaxis. The overall risk of SSI was similar among patients with (43 of 459, 9.4%) and without (101 of 1089, 9.3%) intraoperative redosing (OR = 1.01, 95% CI = 0.7-1.47). However, redosing was beneficial in procedures lasting > 400 minutes; infection occurred in 14 of 182 patients (7.7%) with redosing and in 32 of 200 patients (16.0%) without (adjusted OR = 0.44, 95% CI = 0.23-0.86). Intraoperative redosing of cefazolin was associated with a 16% reduction in the overall risk for SSI after cardiac surgery, including procedures lasting > 240 minutes.74,75

Blood Loss: Swoboda et al. attempted to determine the effect of intraoperative blood loss on prophylactic cefazolin and gentamicin serum and tissue concentration in a prospective study of elective spinal surgical procedures with expected large blood loss. At 60 minutes after the incision, blood loss correlated with cefazolin tissue concentrations (r = −0.66, p = 0.05) and the clearance of gentamicin from the tissues (r = 0.82, p = 0.01). Based on their measured pharmacokinetic values, additional doses of cefazolin should be administered when the operation exceeds 3 hours and blood loss is > 1500 mL. A dose of gentamicin > 1.8 mg/kg should be administered > 30 minutes prior to the surgical incision.144

Blood Loss/Volume Replacement: Markantonis et al. investigated the effects of surgical blood loss and fluid volume replacement on gentamicin concentrations in serum and in three tissue types (subcutaneous fat, epiploic fat, and colonic wall) in patients in undergoing colorectal surgery. Gentamicin was administered at a standard dose of 2 mg/kg and blood and tissue samples were obtained concurrently at specific times throughout each procedure. The mean concentration at first surgical incision was 7.83 (0.82) µg/mL and decreased to 2.60 (0.28) µg/mL at skin closure, resulting in borderline effectiveness even for susceptible gram-negative microorganisms (MIC = 1.0). A strong negative correlation was found between the intravenously administered fluids and gentamicin concentrations in serum and tissues (p ≤ 0.04).145

Klekamp et al. prospectively studied orthopaedic patients with either large or small blood loss who also received vancomycin prophylaxis to determine the effect of intraoperative volume shifts on serum vancomycin concentrations. There were six index patients in the large blood loss group (> 2 L) and seven in the control group (< 2 L), with mean estimated blood loss for index and controls was 4.4 L and 1.0 L; and the mean intraoperative fluid resuscitation, excluding blood products, was 12.4 L and 5.1 L, respectively. There was a modest inverse correlation between blood loss and the intraoperative serum half-life of vancomycin. Although controls maintained slightly higher intraoperative vancomycin concentrations at each time point, there was no statistically significant difference between the groups with regard to absolute concentrations or rate of decline. After 8 hours, the serum concentration of vancomycin exceeded the MIC 90 for *S. aureus* by approximately eightfold in all but one case patient, who was morbidly obese and had massive blood loss. Thus blood loss during orthopaedic procedures has a minimal effect on the intraoperative kinetics of vancomycin and administering vancomycin every 8 to 12 hours seems appropriate for most patients.146

Two well-controlled studies of surgical prophylaxis with cefazolin similarly demonstrated minimal effects of blood loss on drug concentrations during THA and spine fusion procedures. Meter et al. examined the effect of intraoperative blood loss and volume resuscitation during THA on serum levels of cefazolin in 18 patients. At 4 hours after administration, the serum level of cefazolin was 45 μg/mL, which far exceeded the MIC for *S. aureus* (0.5 μg/mL), despite an average intraoperative blood loss of 1137 ± −436 mL. This led the authors to conclude that even with blood losses of 2 L, it is not necessary to redose cefazolin any earlier than 4 hours to maintain the MIC for most common infecting organisms.147 The authors repeated the study in 19 patients undergoing instrumented posterior spinal fusion and found that there was no significant difference between preoperative and intraoperative cefazolin clearance and there was no correlation between blood loss and cefazolin level.148

**Question 16: Should preoperative antibiotic doses be weight-adjusted?**

**Consensus:** Preoperative antibiotics have different pharmacokinetics based on patient weight and should be weight-adjusted.

**Delegate Vote:** Agree: 95%, Disagree: 4%, Abstain: 1% (Strong Consensus)

**Justification:** Because of the relative unpredictability of pharmacokinetics in obese individuals, doses are best estimated on the basis of specific studies for individual drugs carried out in this population. Only a few antibiotics (aminoglycosides, vancomycin, daptomycin, and linezolid) have been studied in the obese population. Recommended dosing by weight for some common antibiotics is shown (Table 2).

AAOS recommendation for the use of IV antibiotic prophylaxis in primary TJA, recommendation 2, states that “timing and dosage of antibiotic administration should optimize the efficacy of the therapy. Dose amount should be proportional to patient weight; for patients > 80 kg, the doses of cefazolin should be doubled.”2

The recommended dose of cefazolin is based on patient’s body mass index (BMI), with 1.0 g for people who weigh < 80 kg and 2.0 g for those who weigh > 80 kg. The adult dose of cefuroxime is 1.5 g. The recommended dose of clindamycin is 600-900 mg.61 The recommended dose of vancomycin, which is based on BMI, is 10-15 mg/kg, up to a limit of 1 g, in patients with normal renal function.149 However, there is literature to support the use of higher doses of vancomycin, with emphasis that doses > 4 g/day have been associated with increased risk of nephrotoxicity. A trough level is obtained prior to the fourth scheduled dose and in certain occasions there may be a need to shorten dosing interval to maintain therapeutic trough level (eg, from every 12 hours to every 8 hours).

Because 30% of adipose is water, an empirical approach is to use the Devine formula to calculate ideal body weight (IBW), to which is added a dosing weight correction factor (DWCF) of 0.3 times the difference between actual body weight (ABW) and IBW (IBW + 0.3 x [ABW-IBW]) to arrive at a weight on which to base dosage of hydrophilic antibiotics. No studies confirm this approach for β-lactam drugs. Clinical studies suggest a DWCF of 0.4 for aminoglycosides and 0.45 for quinolones.150

For aminoglycosides, some suggest using ABW using a dosing correction factor,151,153 while others suggest dosing based on lean body weight (LBW) with appropriate monitoring with the first dose.152 Current guidelines for vancomycin administration are based on loading doses of vancomycin on the total body weight (TBW) of the patient and maintenance doses on the calculated creatinine clearance of the patient.153,154 However, deciding whether to base creatinine clearance calculations on ABW, IBW, or another measure is still to be determined. As a general rule, obese and morbidly obese patients require higher doses of cephalosporin to achieve similar outcomes; however, there are fewer absolute dosing recommendations. At least one study demonstrated that a dose of 2 g cephazolin should provide adequate levels for at least 4 hours, even in super morbid obesity (MO) (BMI ≥ 50 kg/m2).155

Other studies confirm that vancomycin should be given on the basis of ABW, with dosage adjustments based on serum concentrations156 whereas aminoglycoside dosing requires calculation of adjusted body weight via a correction factor.157

Forse et al. conducted a prospective RCT in MO patients undergoing gastroplasty and found that the blood and tissue levels of cefazolin were significantly lower for all MO patients who received 1 g cefazolin compared with the blood and tissue levels of the drug found in normal weight patients who received a similar dose of antibiotic. Moreover, the MO patients who only received 1 g cefazolin had antibiotic levels below the MIC of 2 μg/mL for gram-positive cocci and 4 μg/mL for gram-negative rods. The serum and tissue concentrations were adequate only when 2 g cefazolin were administered. Also, relative to 1 g, the administration of cefazolin 2 g decreased the wound infection rate from 16.5% to 5.6% in these MO patients.18

Van Kralingen et al. studied the influence of body weight measures and age on pharmacokinetic parameters and evaluated unbound cefazolin concentrations over time in obese patients. Twenty MO patients (BMI 38-79 kg/m2) were studied following the administration of 2 g cefazolin at induction of anesthesia. Blood samples were collected up to 4 hours after dosing to determine the total and unbound plasma cefazolin concentrations. Cefazolin clearance was 4.2 ± 1.0 L/hour (mean ± standard deviation) and showed a negative correlation with age (p = 0.003) but not with body weight measures (p > 0.05). In all patients, unbound cefazolin concentrations remained above 1 mg/L (MIC 90) of MSSA until 4 hours after dosing.158

Ho et al. attempted to determine an optimal dosing regimen for cefazolin as a prophylactic antibiotic in surgery for patients with MO. Twenty-five patients undergoing elective surgical procedures were given a single dose of cefazolin: 10 with MO (BMI 40-50 kg/m2) received 2 g via intravenous push (IVP), five with MO received 2 g via 30-minute infusion, five with super morbid obesity (SMO, BMI > 50 kg/m2) received 2 g via infusion, and five with SMO received 3 g via infusion. The protective duration, determined using a pharmacodynamic target for fT > MIC of 70%, was 5.1 hours for MO2-IVP, 4.8 hours for MO2-INF, 5.8 hours for SMO2-INF, and 6.8 hours for SMO3-INF. The authors concluded that a single 2-g dose of cefazolin appears to provide antibiotic exposure sufficient for most common general surgical procedures of < 5-hour duration regardless of BMI.155

In contrast, Edmiston et al. concluded that 2 g cefazolin may not be sufficient for patients with a BMI > 50 kg/m2, based upon measurements of total serum concentrations in morbidly obese patients undergoing gastric bypass. The authors assigned 38 patients to one of 3 BMI groups: (A) BMI = 40-49 kg/m2 (n = 17), (B) BMI = 50-59 kg/m2 (n = 11), and (C) BMI ≥ 60 kg/m2 (n = 10) and measured serum and tissue concentrations of cefazolin. They determined that therapeutic tissue levels were only achieved in 48.1%, 28.6%, and 10.2%% in groups A, B, and C, respectively. The authors measured concentrations in the serum skin, adipose tissue, and omentum, but did not evaluate unbound cefazolin concentrations, which may be expected to migrate across tissues rapidly.159

**Table 2.** Recommended dosing of preoperative antibiotics by weight

| **Antimicrobial** | **ABW (kg)** | **Recommended dose (mg)** | **Perioperative redosing schedule** | **Indication** |
| --- | --- | --- | --- | --- |
| Cefazolin | < 60 | 1000 | Every 4 hours | Primary perioperative prophylaxis |
| 60-120 | 2000 | Every 4 hours |
| > 120 | 3000 | Every 4 hours |
| Cefuroxime | No adjustments | 1500 | Every 4 hours | Primary perioperative prophylaxis |
| Vancomycin | Weight-based dosing recommended | 15 mg/kg (maximum dose 2000 mg) | One dose preop, one dose 12 hours postop, one dose 24 hours postop | Perioperative prophylaxis for current MRSA carriers and/or patients with -lactam allergy |
| Clindamycin | No adjustments | 900 | Every 3 hours | Perioperative prophylaxis for patients with -lactam allergy |
| Teicoplanin | No adjustments | 400 | NA | Perioperative prophylaxis for current MRSA carriers and/or patients with -lactam allergy |

ABW = actual body weight; preop = preoperative; postop = postoperative.

**Question 17A: What type of perioperative antibiotic prophylaxis is recommended for current MRSA carriers?**

**Consensus:** For current MRSA carriers, vancomycin or teicoplanin is the recommended perioperative antibiotic prophylaxis.

**Delegate Vote:** Agree: 86%, Disagree: 12%, Abstain: 2% (Strong Consensus)

**Question 17B: Should patients with prior history of MRSA be rescreened? What should the choice of perioperative prophylactic antibiotics be in these patients?**

**Consensus:** Patients with prior history of MRSA should be rescreened preoperatively. If patients are found to be negative for MRSA, we recommend routine perioperative antibiotic prophylaxis.

**Delegate Vote:** Agree: 76%, Disagree: 23%, Abstain: 1% (Strong Consensus)

**Justification:** Implementation of a MRSA prevention program may significantly reduce MRSA SSIs. However, it is unlikely that any single MRSA-specific intervention (such as adding or switching to vancomycin) can optimally prevent SSIs. Several studies provide convincing data on the clinical effectiveness of vancomycin in preventing SSIs when MRSA prevalence is high.69,70,79 Further research is needed to determine which components of a MRSA prevention program are essential in successfully preventing MRSA SSIs.160 It is uncertain whether decontamination should alter the type of antibiotic prophylaxis, as few studies have retested patients’ MRSA status immediately prior to surgery.

The AAOS recommendations for the use of IV antibiotic prophylaxis in primary TJA, recommendation 2, states that “vancomycin may be used in patients with known colonization with MRSA or in facilities with recent MRSA outbreaks.”1 Additionally, the Society for Healthcare Epidemiology of America recently recommended routine surveillance cultures at the time of admission to the hospital for patients at high risk of MRSA.52

Walsh et al. implemented a comprehensive MRSA program in which vancomycin was added to the routine cefazolin prophylaxis regimen for patients who tested positive for nasal MRSA carriage. Other components of the program included decolonization of all cardiothoracic staff who screened positive for nasal MRSA carriage, application of nasal mupirocin ointment for 5 days in all patients starting 1 day before surgery, application of topical mupirocin to exit sites after removal of chest and mediastinal tubes, and rescreening of patients for MRSA colonization at the time of hospital discharge. This program resulted in a significant reduction in the SSI rate (2.1% versus 0.8%; p < 0.001) as well as a 93% reduction in postoperative MRSA wound infections (from 32 infections/2767 procedures during the 3-year preintervention period to two infections/2496 procedures during the 3-year postintervention period). The data suggest that a bundled approach to preventing MRSA SSIs may be more critical than a single intervention.79

Pofahl et al. published on the impact of introducing MRSA screening programs and treatment of subsequent MRSA SSIs. After a MRSA surveillance program was instituted, the rate of MRSA SSI decreased from 0.23% to 0.09%, with the most pronounced reduction seen in TJA procedures (0.30%-0%) (p = 0.04). However, the authors note that changes in perioperative antibiotics in MRSA-positive patients was at the discretion of the attending surgeon.161

**Question 18: What is the recommended prophylaxis in patients undergoing major orthopaedic reconstructions for either tumor or nonneoplastic conditions using megaprosthesis?**

**Consensus:** Until the emergence of further evidence, we recommend the use of routine antibiotic prophylaxis for patients undergoing major reconstruction.

**Delegate Vote:** Agree: 93%, Disagree: 6%, Abstain: 1% (Strong Consensus)

**Justification:** Deep infection has been reported as being one of the most common complications following endoprosthetic replacement of large bone defects, ranging between 5%-35% in some series.162-166 Reinfection rates after revision surgery for endoprosthetic infection have been reported as high as 43%.165 Despite this there is insufficient evidence to suggest that a different perioperative antibiotic regimen is warranted. Recently a multicenter, blinded, randomized, controlled trial, using a parallel two-arm design has been set up that will evaluate 920 patients from Canada and the USA who are undergoing surgical excision and endoprosthetic reconstruction of a primary bone tumor. The patients will receive either short (24 hours) or long (5 days) duration postoperative antibiotics. The primary outcome will be rates of deep postoperative infections in each arm. Secondary outcomes will include type and frequency of antibiotic-related adverse events, patient functional outcomes and quality-of-life scores, reoperation and mortality.167

Another area of development involves silver coating of foreign materials, such as heart valves, cardiac catheters, and urinary catheters, which has shown the ability to reduce the infection rate of medical devices; therefore, a logical extension of this work was to translate this concept to the field of endoprosthetics.168,169 Both basic science and clinical research suggests a decreased incidence of SSI and PJI in endoprostheses coated with silver. Recently iodine-supported titanium implants have been also effective for preventing and treating infections after major orthopaedic surgery.170,171

In a rabbit study, the infection rate of silver-coated versus noncoated prostheses after inoculation with *Staphylococcus aureus* was determined and the silver concentrations in blood, urine, and organs with possible toxic side effects were documented. The authors convincingly demonstrated that megaprostheses coated with silver showed a significantly lower infection rate (7% versus 47%; p < 0.05) in comparison with a titanium group.173 Furthermore, measurements of C-reactive protein, neutrophilic leukocytes, rectal temperature, and body weight showed significantly lower (p < 0.05) signs of inflammation in the silver group. In a second study, authors analyzed the potential toxicological side effects of these implants and found that the silver concentration in blood (median = 1.883 ppb) and in organs (0.798-86.002 ppb) showed elevated silver concentrations, without pathologic changes in laboratory parameters and without histologic changes of organs.172

In a prospective observational study, Hardes et al. compared the infection rate in 51 patients with sarcoma (proximal femur, n = 22; proximal tibia, n = 29) who underwent placement of a silver-coated megaprosthesis to 74 patients (proximal femur, n = 33; proximal tibia, n = 41) in whom an uncoated titanium megaprostheses was used. The authors reported a substantial reduction in the infection rate from 17.6% in the titanium group compared to 5.9% in the silver group (p = 0.06). Furthermore, while 38.5% of patients ultimately underwent amputation when PJI developed, this was not necessary in any case in the study group. However, the authors note that the operating time required for the proximal tibia replacement was significantly shorter in the silver-coated prosthesis group (p = 0.034) and that prolonged operating time was associated with a higher rate of PJI (p = 0.025).

The same group reported a lack of toxicological side effects of silver-coated megaprostheses in 20 patients with bone metastases.173 They reported that silver levels in the blood did not exceed 56.4 ppb and can be considered nontoxic. They further excluded significant changes in liver and kidney function based on laboratory values; and histopathologic examination of the periprosthetic environment in two patients showed no signs of foreign body granulomas or chronic inflammation, despite effective silver concentrations up to 1626 ppb directly related to the prosthetic surface.173

Tsuchiya et al reported that iodine-supported implants were used to prevent infection in 257 patients with compromised status. Acute infection developed only in three tumor cases and one diabetic foot among the 257 patients. Abnormalities of thyroid gland function were not detected. None of the patients experienced loosening of the implant. Excellent bone ingrowth was found around all hip and tumor prostheses. The results indicate that iodine-supported titanium has favorable antibacterial activity, biocompatibility, and no cytotoxicity.170

Gosheger reviewed 197 patients with megaprostheses and discovered that those with cobalt chrome implants had more infections than those with titanium implants.176 Reviewing 197 patients (77 patients with a cobalt chrome alloy system and 120 patients with a titanium alloy system) who underwent lower extremity reconstruction with a megaprosthesis, the authors reported a 31.2% infection rate in the cobalt chrome group compared to 14.2% in the titanium group (p < 0.01). When they performed a secondary analysis matching two identical subgroups, the cobalt chrome group was still associated with a significantly higher infection rate, with five infections of 26 megaprostheses versus one infection of 36 titanium megaprostheses (p < 0.05).174

**Question 19: Should antibiotic prophylaxis be different in patients who have reconstruction by bulk allograft?**

**Consensus:** We recommend the use of routine antibiotic prophylaxis in patients who have reconstruction by bulk allograft.

**Delegate Vote:** Agree: 93%, Disagree: 5%, Abstain: 2% (Strong Consensus)

**Justification:** The periprosthetic area is inherently a locus minoris resistance. Bulk allograft is in essence is a large foreign body and therefore represents a nidus for deep infection following surgery, apart from the prosthetic components. Additionally, bulk allografts are used most often in the setting of revision arthroplasty when there is frequently additional local soft tissue and vascular compromise, which compounds the risk for infection. Therefore, it would seem reasonable to want to modify the perioperative antibiotic protocol to protect these reconstructions. Unfortunately, there is insufficient literature to support altering antibiotic regimens, as most studies on the use of bulk allograft do not indicate or detail the antibiotic regimens utilized. Even if these data were available, it would not be accurate to properly compare the infection rates of different clinical series based on their perioperative antibiotic protocols because of the heterogeneity of patient populations. However, there is a growing body of literature to support the use of antibiotic-impregnated allograft in the revision setting as a means of decreasing infection rates. In addition, there are several reports of using antibiotic-impregnated graft substitute or grafts as a way to fill bony defects and promote bony ingrowth while delivering supratherapeutic doses of antibiotics to the local environment in cases of osteomyelitis. While there is no current literature applying this technology to the use of bone defects in infected revision arthroplasty, it may be a promising technique.

Witso et al. used netilmicin-impregnated allografts for reconstruction in revision hip and knee surgery and found no adverse effects.175 Buttaro et al. favorably used vancomycin-supplemented cancellous grafts for reconstruction after infected THA 176,177 Michalak et al. and Khoo et al. impregnated segmental allografts with gentamicin and flucloxacillin, respectively.178,179 However, all these groups used antibiotic-impregnated grafts only in the second stage of a two-stage revision, after resolution of clinical and laboratory evidence of infection.

Winkler et al. performed 37 one-stage uncemented revision THAs using cancellous allograft bone impregnated with antibiotics and noted a 92% success rate, defined as recurrent infection at a mean follow-up of 4.4 years (range = 2-8 years). In addition, no adverse effects were seen and the incorporation of bone graft was comparable to unimpregnated grafts.180

In a similar series, Buttaro analyzed the incidence of infection after one-stage aseptic revision hip reconstruction using acetabular and/or femoral vancomycin-impregnated impacted bone allograft and a THA fixed with cement containing no antibiotic. In 75 consecutive patients (80 hips), followed for a mean of 36 months (range = 24-59 months), deep infection occurred in one patient for an incidence of infection of 1.25%, which occurred 2 years after the index procedure and was thought to be hematogenous in origin.181

Cancellous bone allograft can store and release high initial local amounts of vancomycin without compromising incorporation of the graft, and some favorable results have been published following two-stage revision of infected THA with this technique.176,177,182-184

**Question 20: Do patients with poorly controlled diabetes, immunosuppression, or autoimmune disease require a different perioperative antibiotic prophylaxis?**

**Consensus:** No. Routine antibiotic prophylaxis is recommended in these patients.

**Delegate Vote:** Agree: 90%, Disagree: 9%, Abstain: 1% (Strong Consensus)

**Justification:** Several studies have demonstrated that diabetes mellitus (DM), especially uncontrolled DM, is a risk factor for postoperative infection in THA and TKA.185-188 A recent retrospective cohort study within the Kaiser Healthcare system found no significant increase in risk of revision or deep infection or revision whether patients had controlled (HbA1c < 7%) or uncontrolled diabetes (HbA1c > 7%). Specifically, compared with patients without DM, there was no association between controlled DM and risk of revision (OR = 1.32, 95% CI = 0.99-1.76). Similarly, compared to patients without DM, there was no association between uncontrolled DM and risk of revision (OR = 1.03, 95% CI = 0.68-1.54).189

Obesity has also been associated with a significant increase in rate of postoperative infection following TJA.190-192

Human immunodeficiency virus (HIV) has also been associated with an alarming rate of postoperative complications, including infection. Parvizi et al. reported on six deep infections in 21 HIV-positive patients undergoing TJA. The authors remarked that the immune status of the patients was related to their risk of deep PJI, in that five of the six patients ultimately developed Acquired Immune Deficiency Syndrome (AIDS) and the CD4 count was significantly lower at 239 ± 112 µL at latest follow-up for patients who developed infection compared to 523 ± 171 µL for the study population as a whole (p < 0.001). In this study the authors reported using prophylactic antibiotics (cephalosporins) preoperatively and three doses postoperatively and added antibiotic powder (vancomycin and tobramycin) to the cement in two patients thought to be at high risk for infection.193

Similarly, Ragni et al. found a very high postoperative infection rate (26.5%) in 34 TJA in HIV-positive hemophiliacs, all of whom had CD4 counts of < 200/µL at time of surgery.194 Haberman et al. noted an infection rate of 12.7% in their cohort of 41 patients with HIV undergoing TJA, but did not identify any difference in the outcomes relating to CD4 count.195 Their perioperative antibiotic protocol was a 5-day course of cefuroxime and in all procedures antibiotic-containing cement (Palacos® R, Zimmer, Inc, Warsaw, IN, USA) was used. In a smaller series of six HIV-infected patients undergoing TJA, Wang et al. noted no infectious or other complications. The authors again used antibiotic (vancomycin)-impregnated bone cement in all cemented cases.196 Unger et al. evaluated the results of 26 TKAs in HIV-positive hemophiliacs and found no cases of deep infection, but it is interesting to note that the average CD4 count of these patients was 463 µL.197

Hemophilia has historically been considered a risk factor for PJI, due in part to its relation to HIV and AIDS, but also as an independent risk factor. An article by Silva et al. reviewed the long-term results of primary TKA in patients with hemophilia and noted an overall prevalence of PJI of 16% with a rate of infection in HIV-positive and HIV-negative patients of 17% and 13%, respectively (p = 0.5). The authors’ perioperative protocol included 3-5 days of prophylactic antibiotics and antibiotic cement was not used.198 In contrast, Rodriguez-Marchan reported an infection rate of only 3% of 35 TJA in hemophiliac patients, but used antibiotic-laden bone cement and 2 days of perioperative antibiotic prophylaxis.199

Asplenic patients are at increased risk of infection by encapsulated bacteria; and although there is evidence to support vaccinations and penicillin prophylaxis in patients younger than 16 years and older than 50 years, there is no consensus on the appropriate perioperative management of these immunocompromised patients. In a single case report by Shaarani et al. of an asplenic patient who underwent a TKA, the patient ultimately developed a MRSA infection. In this case standard polymethylmethacrylate (PMMA) was used for cementing components and the patient received intravenous prophylactic dose of second-generation cephalosporin preoperatively.200

Renal disease (including renal failure, dialysis dependence, and renal transplant) has been implicated as increasing the risk of PJI. McCleery et al. analyzed the Scottish Arthroplasty Registry in order to determine the rates of PJI in patients with renal failure, those undergoing dialysis, and those with a renal transplant. They found that patients with renal failure had a significantly increased risk of early infection (1.6%; RR = 1.52; p = 0.02) and late infection (4.47%; RR = 2.2; p < 0.001). Patients on dialysis had a significantly increased risk of late infection (8.0%; RR = 3.99; p < 0.001) and early revision (3.7%; RR = 4.4; p < 0.001). Renal transplant patients had a significantly increased risk of late infection, despite whether the transplantation occurred before TKA (9.1%; RR = 4.5; p = 0.03) or at any time (8.0%; RR = 4.0; p = 0.05).201 Lieberman et al. documented a deep infection rate of 19% in 16 chronic renal dialysis patients and more favorable outcomes in renal transplant patients.202 Sakalkale et al. reported a deep infection rate of 13% in 12 patients with end-stage renal failure on dialysis who underwent THA. In this study, perioperative prophylactic antibiotics were administered for 2-5 days.203 In contrast, other authors have reported no increased rate of infection in patients on chronic hemodialysis undergoing THA.204,205

Similarly, liver disease has been associated with increased morbidity following TJA. Pour et al. performed a case control study of 71 noncirrhotic patients with hepatitis C undergoing TJA and found that this cohort had higher rates of wound drainage following THA when compared to matched controls (15% versus 3.8%; p = 0.03).206 Orozco et al. recently published a case control study to analyze the effect of fibrosis and thrombocytopenia on the diagnosis of hepatitis C and clinical outcomes. Analyzing 72 patients (77 joint replacements), the authors found that fibrotic hepatitis C patients had higher deep infection rates (21% versus 0%; p = 0.047) and rates of cellulitis (21% versus 0%; p = 0.047), while thromobocytopenia showed a trend toward greater infection.207

Solid organ transplant (SOT) is a risk factor for PJI due to the need for chronic use of immunosuppressant medications. Vergidis et al. performed a case control study of patients with SOT who developed PJI and compared them to noninfected controls matched by transplant type, prosthetic joint type, and order of organ transplantation or joint implantation. Of 367 patients with both a joint replacement and SOT, there were 12 cases of PJI, of which eight were renal transplants, three were liver transplants, and one was a heart transplant patient. Eight infections were caused by gram-positive organisms, two were caused by nontuberculous mycobacteria, and the remaining two were culture-negative. Of note, patients received perioperative cefazolin, or in cases of colonization or prior infection with MRSA, vancomycin.208 Tannenbaum et al. reported results on 35 TJA in 19 patients with renal or liver transplant and documented an infection in five patients who had the joint replacement after the transplantation. There were no infections in patients who had TJA before the organ transplantation. In this series, prophylactic antibiotics were administered for at least 48 hours or until the drains were removed and bone cement when used was not impregnated with antibiotics.209

**Question 21A: Should preoperative antibiotics be different for primary and revision TJA?**

**Consensus:** No. Perioperative antibiotic prophylaxis should be the same for primary and uninfected revision arthroplasty.

**Delegate Vote:** Agree: 89%, Disagree: 10%, Abstain: 1% (Strong Consensus)

**Question 21B: Should preoperative antibiotics be different for hips and knees?**

**Consensus:** Perioperative antibiotic prophylaxis should be the same for hips and knees.

**Delegate Vote:** Agree: 99%, Disagree: 1%, Abstain: 0% (Strong Consensus)

**Justification:** Patients undergoing revision TJA are at higher risk of developing PJI than primary arthroplasty and those undergoing revision knee procedures are at even highest risk.210-212 One recent study has effectively demonstrated targeting infection prevention programs at high-risk surgical patients that take into account an institution’s local epidemiology and antibiogram.213

Liu et al. determined the impact of adding vancomycin to cefazolin as antimicrobial prophylaxis in 414 patients undergoing revision TKA based on a notable increase in PJI in revision TKA patients, with many being methicillin-resistant. Following introduction of vancomycin to the routine preoperative antibiotic prophylaxis, the infection rate decreased from 7.89% to 3.13% (p = 0.046). In particular, a significant reduction in PJI resulting from methicillin-resistant organisms over this time period was seen (from 4.2% to 0.9%) (p = 0.049).219

**Question 22: What is the best antibiotic prophylaxis to choose in patients with colonization by carbapenem-resistant Enterobacteriaceae or multidrug-resistant (MDR)-*Acinetobacter* species?**

**Consensus:** There are insufficient data to recommend expanded antibiotic prophylaxis in patients known to be colonized or recently infected with MDR pathogens.

**Delegate Vote:** Agree: 76%, Disagree: 8%, Abstain: 16% (Strong Consensus)

**Justification:** There is an increasing awareness of the threat posed by *K. pneumoniae* strains with decreased susceptibility to carbapenems worldwide.214 This resistance is conferred by *K. pneumoniae* carbapemenase(KPC), which is a β-lactamase that also confers resistance to broad-spectrum cephalosporins, as well as commercially available β-lactam/β-lactamase inhibitor combinations.215 As there are few antimicrobial options, prevention of *K. pneumoniae* carbapemenase*-*producing *K. pneumoniae* (KPC-KP) has become a major priority of those studying nosocomial infections.216

While there is no evidence on the management of surgical antimicrobial prophylaxis in a patient with past infection or colonization with a resistant gram-negative pathogen, it is logical to provide prophylaxis with an agent active against MRSA for any patient known to be colonized with this gram-positive pathogen who will have a skin incision; specifically, prophylaxis for a resistant gram-negative pathogen in a patient with past infection or colonization with such a pathogen may not be necessary for a purely cutaneous procedure.

In a literature review, KPC-producing microbes are resistant to many non-β-lactam molecules. Most isolates are resistant to fluoroquinolones, aminoglycosides, and co-trimoxazole. Some isolates are susceptible to amikacin and gentamicin and most are susceptible to colistin and tigecycline.214,217-219

In a prospective RCT, De Smet et al. studied the elimination of colonization with MDR organisms using selective oropharyngeal and/or digestive tract decontamination (SOD/SDD) in a multicenter crossover study using cluster randomization of 5939 intensive care unit patients in the Netherlands. SOD included 4 days of intravenous cefotaxime and topical application of tobramycin, colistin, and amphotericin B in the oropharynx and stomach. SDD consisted of oropharyngeal application only of the same antimicrobials. Using a random effects logistic regression analysis, the OR for death at day 28 in the SOD and SDD group, as compared with the standard care group, were 0.86 (95% CI = 0.74-0.99) and 0.83 (95% CI = 0.72-0.97), respectively.220

Perez et al. used a mouse model to examine the effect of antibiotic treatment on the establishment and elimination of intestinal colonization of KPC-KP. They administered 3 days of antibiotics (clindamycin, zosyn, tigecycline, ertapenem, cefepime, and ciprofloxacin) before KPC-KP was administered orogastrically. The authors reported that of the 4 antibiotics with minimal activity against the KPC-KP strain (MIC > 16 μg/mL), those that suppressed total anaerobes and Bacteroides (ie, clindamycin and zosyn) promoted colonization by KPC-KP (p < 0.001), while agents that did not suppress total anaerobes and bacteroides (ie, ciprofloxacin and cefepime) did not (p = 0.35). Of the antibiotics with moderate activity against KPC-KP, ertapenem (MIC = 4 μg/mL) did not promote colonization by KPC-KP, while tigecycline (MIC = 3 μg/mL) did (p < 0.001), despite not reducing levels of total anaerobes and bacteroides. Orogastric administration of gentamicin and polymyxin E-suppressed KPC-KP was at undetectable levels in the majority of mice. The authors posited that antibiotics that disturb the intestinal anaerobic microflora lack significant activity against KPC-KP promote colonization, while the administration of nonabsorbed oral antibiotics may be an effective strategy to suppress colonization with this microorganism.221

**References:**

1. Recommendations for the Use of Intravenous Antibiotic Prophylaxis in Primary Total Joint Arthroplasty. Available at: <http://www.aaos.org/about/papers/advistmt/1027.asp>. Accessed 2013.

2. Prokuski L. Prophylactic antibiotics in orthopaedic surgery. J Am Acad Orthop Surg. 2008;16(5):283-293.

3. Bratzler DW, Houck PM. Antimicrobial prophylaxis for surgery: an advisory statement from the National Surgical Infection Prevention Project. Clin Infect Dis. 2004;38(12):1706-1715.

4. van Kasteren ME, Mannien J, Ott A, Kullberg BJ, de Boer AS, Gyssens IC. Antibiotic prophylaxis and the risk of surgical site infections following total hip arthroplasty: timely administration is the most important factor. Clin Infect Dis. 2007;44(7):921-927.

5. Classen DC, Evans RS, Pestotnik SL, Horn SD, Menlove RL, Burke JP. The timing of prophylactic administration of antibiotics and the risk of surgical-wound infection. N Engl J Med. 1992;326(5):281-286.

6. Bratzler DW, Houck PM. Antimicrobial prophylaxis for surgery: an advisory statement from the National Surgical Infection Prevention Project. Am J Surg. 2005;189(4):395-404.

7. Galandiuk S, Polk HC Jr, Jagelman DG, Fazio VW. Re-emphasis of priorities in surgical antibiotic prophylaxis. Surg Gynecol Obstet. 1989;169(3):219-222.

8. Hawn MT, Richman JS, Vick CC, et al. Timing of surgical antibiotic prophylaxis and the risk of surgical site infection. JAMA Surg. 2013;148(7):649-657.

9. Weber WP, Marti WR, Zwahlen M, et al. The timing of surgical antimicrobial prophylaxis. Ann Surg. 2008;247(6):918-926.

10. Steinberg JP, Braun BI, Hellinger WC, et al. Timing of antimicrobial prophylaxis and the risk of surgical site infections: results from the Trial to Reduce Antimicrobial Prophylaxis Errors. Ann Surg. 2009;250(1):10-16.

11. Johnson DP. Antibiotic prophylaxis with cefuroxime in arthroplasty of the knee. J Bone Joint Surg Br. 1987;69(5):787-789.

12. Friedman RJ, Friedrich LV, White RL, Kays MB, Brundage DM, Graham J. Antibiotic prophylaxis and tourniquet inflation in total knee arthroplasty. Clin Orthop Relat Res. 1990;(260):17-23.

13. Soriano A, Bori G, Garcia-Ramiro S, et al. Timing of antibiotic prophylaxis for primary total knee arthroplasty performed during ischemia. Clin Infect Dis. 2008;46(7):1009-1014.

14. W-Dahl A, Robertsson O, Stefansdottir A, Gustafson P, Lidgren L. Timing of preoperative antibiotics for knee arthroplasties: Improving the routines in Sweden. Patient Saf Surg. 2011;5:22.

15. Neu HC. Cephalosporin antibiotics as applied in surgery of bones and joints. Clin Orthop Relat Res. 1984;(190):50-64.

16. Oishi CS, Carrion WV, Hoaglund FT. Use of parenteral prophylactic antibiotics in clean orthopaedic surgery. A review of the literature. Clin Orthop Relat Res. 1993;(296):249-255.

17. Schurman DJ, Hirshman HP, Kajiyama G, Moser K, Burton DS. Cefazolin concentrations in bone and synovial fluid. J Bone Joint Surg Am. 1978;60(3):359-362.

18. Forse RA, Karam B, MacLean LD, Christou NV. Antibiotic prophylaxis for surgery in morbidly obese patients. Surgery. 1989;106(4):750-756; discussion 756-757.

19. Sodhi M, Axtell SS, Callahan J, Shekar R. Is it safe to use carbapenems in patients with a history of allergy to penicillin? J Antimicrob Chemother. 2004;54(6):1155-1157.

20. Hill C, Flamant R, Mazas F, Evrard J. Prophylactic cefazolin versus placebo in total hip replacement. Report of a multicentre double-blind randomised trial. Lancet. 1981;1(8224):795-796.

21. Tyllianakis ME, Karageorgos A, Marangos MN, Saridis AG, Lambiris EE. Antibiotic prophylaxis in primary hip and knee arthroplasty: comparison between cefuroxime and two specific antistaphylococcal agents. J Arthroplasty. 2010;25(7):1078-1082.

22. Mauerhan DR, Nelson CL, Smith DL, et al. Prophylaxis against infection in total joint arthroplasty. One day of cefuroxime compared with three days of cefazolin. J Bone Joint Surg Am. 1994;76(1):39-45.

23. Stefansdottir A, Johansson D, Knutson K, Lidgren L, Robertsson O. Microbiology of the infected knee arthroplasty: report from the Swedish Knee Arthroplasty Register on 426 surgically revised cases. Scand J Infect Dis. 2009;41(11-12):831-840.

24. Enzler MJ, Berbari E, Osmon DR. Antimicrobial prophylaxis in adults. Mayo Clin Proc. 2011;86(7):686-701.

25. Wilson W, Taubert KA, Gewitz M, et al. Prevention of infective endocarditis: guidelines from the American Heart Association: a guideline from the American Heart Association Rheumatic Fever, Endocarditis, and Kawasaki Disease Committee, Council on Cardiovascular Disease in the Young, and the Council on Clinical Cardiology, Council on Cardiovascular Surgery and Anesthesia, and the Quality of Care and Outcomes Research Interdisciplinary Working Group. Circulation. 2007;116(15):1736-1754.

26. Eagle KA, Guyton RA, Davidoff R, et al. ACC/AHA 2004 guideline update for coronary artery bypass graft surgery: a report of the American College of Cardiology/American Heart Association Task Force on Practice Guidelines (Committee to Update the 1999 Guidelines for Coronary Artery Bypass Graft Surgery). Circulation. 2004;110(14):e340-437.

27. Edwards FH, Engelman RM, Houck P, Shahian DM, Bridges CR. The Society of Thoracic Surgeons Practice Guideline Series: Antibiotic Prophylaxis in Cardiac Surgery, Part I: Duration. Ann Thorac Surg. 2006;81(1):397-404.

28. Haydon TP, Presneill JJ, Robertson MS. Antibiotic prophylaxis for cardiac surgery in Australia. Med J Aust. 2010;192(3):141-143.

29. Mollan RA, Haddock M, Webb CH. Teicoplanin vs cephamandole for antimicrobial prophylaxis in prosthetic joint implant surgery: (preliminary results). Eur J Surg Suppl. 1992(567):19-21.

30. Lazzarini L, Pellizzer G, Stecca C, Viola R, de Lalla F. Postoperative infections following total knee replacement: an epidemiological study. J Chemother. 2001;13(2):182-187.

31. Periti P, Pannuti F, Della Cuna GR, et al. Combination chemotherapy with cyclophosphamide, fluorouracil, and either epirubicin or mitoxantrone: a comparative randomized multicenter study in metastatic breast carcinoma. Cancer Invest. 1991;9(3):249-255.

32. Periti P, Stringa G, Mini E. Comparative multicenter trial of teicoplanin versus cefazolin for antimicrobial prophylaxis in prosthetic joint implant surgery. Italian Study Group for Antimicrobial Prophylaxis in Orthopedic Surgery. Eur J Clin Microbiol Infect Dis. 1999;18(2):113-119.

33. Brogden RN, Peters DH. Teicoplanin. A reappraisal of its antimicrobial activity, pharmacokinetic properties and therapeutic efficacy. Drugs. 1994;47(5):823-854.

34. Wood MJ. The comparative efficacy and safety of teicoplanin and vancomycin. J Antimicrob Chemother. 1996;37(2):209-222.

35. Wilson AP. Antibiotic prophylaxis in cardiac surgery. J Antimicrob Chemother. 1988;21(5):522-524.

36. Darley ES, MacGowan AP. Antibiotic treatment of gram-positive bone and joint infections. J Antimicrob Chemother. 2004;53(6):928-935.

37. Dash CH. Penicillin allergy and the cephalosporins. J Antimicrob Chemother. 1975;1(3 Suppl):107-118.

38. Petz LD. Immunologic cross-reactivity between penicillins and cephalosporins: a review. J Infect Dis. 1978;137(Suppl):S74-S79.

39. Kelkar PS, Li JT. Cephalosporin allergy. N Engl J Med. 2001;345(11):804-809.

40. Saxon A, Beall GN, Rohr AS, Adelman DC. Immediate hypersensitivity reactions to beta-lactam antibiotics. Ann Intern Med. 1987;107(2):204-215.

41. Pichichero ME. Use of selected cephalosporins in penicillin-allergic patients: a paradigm shift. Diagn Microbiol Infect Dis. 2007;57(3 Suppl):13S-18S.

42. Pichichero ME, Casey JR. Safe use of selected cephalosporins in penicillin-allergic patients: a meta-analysis. Otolaryngol Head Neck Surg. 2007;136(3):340-347.

43. Audicana M, Bernaola G, Urrutia I, et al. Allergic reactions to betalactams: studies in a group of patients allergic to penicillin and evaluation of cross-reactivity with cephalosporin. Allergy. 1994;49(2):108-113.

44. Solensky R, Earl HS, Gruchalla RS. Lack of penicillin resensitization in patients with a history of penicillin allergy after receiving repeated penicillin courses. Arch Intern Med. 2002;162(7):822-826.

45. Campagna JD, Bond MC, Schabelman E, Hayes BD. The use of cephalosporins in penicillin-allergic patients: a literature review. J Emerg Med. 2012;42(5):612-620.

46. DePestel DD, Benninger MS, Danziger L, et al. Cephalosporin use in treatment of patients with penicillin allergies. J Am Pharm Assoc (2003). 2008;48(4):530-540.

47. Platt R. Adverse effects of third-generation cephalosporins. J Antimicrob Chemother. 1982;10(Suppl C):135-140.

48. Goodman EJ, Morgan MJ, Johnson PA, Nichols BA, Denk N, Gold BB. Cephalosporins can be given to penicillin-allergic patients who do not exhibit an anaphylactic response. J Clin Anesth. 2001;13(8):561-564.

49. Apter AJ, Kinman JL, Bilker WB, et al. Is there cross-reactivity between penicillins and cephalosporins? Am J Med. 2006;119(4):354 e311-359.

50. Park MA, Koch CA, Klemawesch P, Joshi A, Li JT. Increased adverse drug reactions to cephalosporins in penicillin allergy patients with positive penicillin skin test. Int Arch Allergy Immunol. 2010;153(3):268-273.

51. Advisory statement. Recommendations for the use of intravenous antibiotic prophylaxis in primary total joint arthroplasty. Available at: <http://www.aaos.org/about/papers/advistmt/1027.asp>. Accessed 2013.

52. Muto CA, Jernigan JA, Ostrowsky BE, et al. SHEA guideline for preventing nosocomial transmission of multidrug-resistant strains of Staphylococcus aureus and enterococcus. Infect Control Hosp Epidemiol. 2003;24(5):362-386.

53. Cantoni L, Glauser MP, Bille J. Comparative efficacy of daptomycin, vancomycin, and cloxacillin for the treatment of Staphylococcus aureus endocarditis in rats and role of test conditions in this determination. Antimicrob Agents Chemother. 1990;34(12):2348-2353.

54. Patel M, Kumar RA, Stamm AM, Hoesley CJ, Moser SA, Waites KB. USA300 genotype community-associated methicillin-resistant Staphylococcus aureus as a cause of surgical site infections. J Clin Microbiol. 2007;45(10):3431-3433.

55. Manian FA, Griesnauer S. Community-associated methicillin-resistant Staphylococcus aureus (MRSA) is replacing traditional health care-associated MRSA strains in surgical-site infections among inpatients. Clin Infect Dis. 2008;47(3):434-435.

56. Recommendations for preventing the spread of vancomycin resistance. Recommendations of the Hospital Infection Control Practices Advisory Committee (HICPAC). MMWR Recomm Rep. 1995;44(RR-12):1-13.

57. Hiramatsu K, Aritaka N, Hanaki H, et al. Dissemination in Japanese hospitals of strains of Staphylococcus aureus heterogeneously resistant to vancomycin. Lancet. 1997;350(9092):1670-1673.

58. Michel M, Gutmann L. Methicillin-resistant Staphylococcus aureus and vancomycin-resistant enterococci: therapeutic realities and possibilities. Lancet. 1997;349(9069):1901-1906.

59. Fulkerson E, Valle CJ, Wise B, Walsh M, Preston C, Di Cesare PE. Antibiotic susceptibility of bacteria infecting total joint arthroplasty sites. J Bone Joint Surg Am. 2006;88(6):1231-1237.

60. UK Health protection agency. Surgical Site Infection surveillance service. Protocol for surveillance of surgical site infection. Available at: <http://www.hpa.org/uk/we/HPAwebFile/HPAweb_C/1194947388966>. Accessed 2013.

61. Meehan J, Jamali AA, Nguyen H. Prophylactic antibiotics in hip and knee arthroplasty. J Bone Joint Surg Am. 2009;91(10):2480-2490.

62. Wiesel BB, Esterhai JL. Prophylaxis of musculoskeletal infections. In: Mader JC, Calhoun JH, eds. Musculoskeletal Infections. New York, NY: Marcel Dekker; 2003:115-129.

63. Merrer J, Desbouchages L, Serazin V, Razafimamonjy J, Pauthier F, Leneveu M. Comparison of routine prophylaxis with vancomycin or cefazolin for femoral neck fracture surgery: microbiological and clinical outcomes. Infect Control Hosp Epidemiol. 2006;27(12):1366-1371.

64. Cranny G, Elliott R, Weatherly H, et al. A systematic review and economic model of switching from non-glycopeptide to glycopeptide antibiotic prophylaxis for surgery. Health Technol Assess. 2008;12(1):iii-iv, xi-xii, 1-147.

65. Bolon MK, Morlote M, Weber SG, Koplan B, Carmeli Y, Wright SB. Glycopeptides are no more effective than beta-lactam agents for prevention of surgical site infection after cardiac surgery: a meta-analysis. Clin Infect Dis. 2004;38(10):1357-1363.

66. Mangram AJ, Horan TC, Pearson ML, Silver LC, Jarvis WR. Guideline for prevention of surgical site infection, 1999. Hospital Infection Control Practices Advisory Committee. Infect Control Hosp Epidemiol. 1999;20(4):250-278; quiz 279-280.

67. Tacconelli E, Cataldo MA, Albanese A, et al. Vancomycin versus cefazolin prophylaxis for cerebrospinal shunt placement in a hospital with a high prevalence of methicillin-resistant Staphylococcus aureus. J Hosp Infect. 2008;69(4):337-344.

68. Finkelstein R, Rabino G, Mashiah T, et al. Vancomycin versus cefazolin prophylaxis for cardiac surgery in the setting of a high prevalence of methicillin-resistant staphylococcal infections. J Thorac Cardiovasc Surg. 2002;123(2):326-332.

69. Garey KW, Lai D, Dao-Tran TK, Gentry LO, Hwang LY, Davis BR. Interrupted time series analysis of vancomycin compared to cefuroxime for surgical prophylaxis in patients undergoing cardiac surgery. Antimicrob Agents Chemother. 2008;52(2):446-451.

70. Spelman D, Harrington G, Russo P, Wesselingh S. Clinical, microbiological, and economic benefit of a change in antibiotic prophylaxis for cardiac surgery. Infect Control Hosp Epidemiol. 2002;23(7):402-404.

71. Smith EB, Wynne R, Joshi A, Liu H, Good RP. Is it time to include vancomycin for routine perioperative antibiotic prophylaxis in total joint arthroplasty patients? J Arthroplasty. 2012;27(8 Suppl):55-60.

72. Bull AL, Worth LJ, Richards MJ. Impact of vancomycin surgical antibiotic prophylaxis on the development of methicillin-sensitive staphylococcus aureus surgical site infections: report from Australian Surveillance Data (VICNISS). Ann Surg. 2012;256(6):1089-1092.

73. Miller LG, McKinnell JA, Vollmer ME, Spellberg B. Impact of methicillin-resistant Staphylococcus aureus prevalence among S. aureus isolates on surgical site infection risk after coronary artery bypass surgery. Infect Control Hosp Epidemiol. 2011;32(4):342-350.

74. Zanetti G, Giardina R, Platt R. Intraoperative redosing of cefazolin and risk for surgical site infection in cardiac surgery. Emerg Infect Dis. 2001;7(5):828-831.

75. Zanetti G, Goldie SJ, Platt R. Clinical consequences and cost of limiting use of vancomycin for perioperative prophylaxis: example of coronary artery bypass surgery. Emerg Infect Dis. 2001;7(5):820-827.

76. Muralidhar B, Anwar SM, Handa AI, Peto TE, Bowler IC. Prevalence of MRSA in emergency and elective patients admitted to a vascular surgical unit: implications for antibiotic prophylaxis. Eur J Vasc Endovasc Surg. 2006;32(4):402-407.

77. Gemmell CG, Edwards DI, Fraise AP, Gould FK, Ridgway GL, Warren RE. Guidelines for the prophylaxis and treatment of methicillin-resistant Staphylococcus aureus (MRSA) infections in the UK. J Antimicrob Chemother. 2006;57(4):589-608.

78. Elliott RA, Weatherly HL, Hawkins NS, et al. An economic model for the prevention of MRSA infections after surgery: non-glycopeptide or glycopeptide antibiotic prophylaxis? Eur J Health Econ. 2010;11(1):57-66.

79. Walsh EE, Greene L, Kirshner R. Sustained reduction in methicillin-resistant Staphylococcus aureus wound infections after cardiothoracic surgery. Arch Intern Med. 2011;171(1):68-73.

80. Dhadwal K, Al-Ruzzeh S, Athanasiou T, et al. Comparison of clinical and economic outcomes of two antibiotic prophylaxis regimens for sternal wound infection in high-risk patients following coronary artery bypass grafting surgery: a prospective randomised double-blind controlled trial. Heart. 2007;93(9):1126-1133.

81. Patrick S, James C, Ali A, Lawson S, Mary E, Modak A. Vascular surgical antibiotic prophylaxis study (VSAPS). Vasc Endovascular Surg. 2010;44(7):521-528.

82. Sewick A, Makani A, Wu C, O'Donnell J, Baldwin KD, Lee GC. Does dual antibiotic prophylaxis better prevent surgical site infections in total joint arthroplasty? Clin Orthop Relat Res. 2012;470(10):2702-2707.

83. Ritter MA, Barzilauskas CD, Faris PM, Keating EM. Vancomycin prophylaxis and elective total joint arthroplasty. Orthopedics. 1989;12(10):1333-1336.

84. Cruess RL, Bickel WS, vonKessler KL. Infections in total hips secondary to a primary source elsewhere. Clin Orthop Relat Res. 1975;(106):99-101.

85. Hall AJ. Late infection about a total knee prosthesis. Report of a case secondary to urinary tract infection. J Bone Joint Surg Br. 1974;56(1):144-147.

86. David TS, Vrahas MS. Perioperative lower urinary tract infections and deep sepsis in patients undergoing total joint arthroplasty. J Am Acad Orthop Surg. 2000;8(1):66-74.

87. Ritter MA, Fechtman RW. Urinary tract sequelae: possible influence on joint infections following total joint replacement. Orthopedics. 1987;10(3):467-469.

88. Wymenga AB, van Horn JR, Theeuwes A, Muytjens HL, Slooff TJ. Perioperative factors associated with septic arthritis after arthroplasty. Prospective multicenter study of 362 knee and 2,651 hip operations. Acta Orthop Scand. 1992;63(6):665-671.

89. Glynn MK, Sheehan JM. The significance of asymptomatic bacteriuria in patients undergoing hip/knee arthroplasty. Clin Orthop Relat Res. 1984;(185):151-154.

90. Waterhouse N, Beaumont AR, Murray K, Staniforth P, Stone MH. Urinary retention after total hip replacement. A prospective study. J Bone Joint Surg Br. 1987;69(1):64-66.

91. Walton JK, Robinson RG. An analysis of a male population having total hip replacement with regard to urological assessment and post-operative urinary retention. Br J Urol. 1982;54(5):519-521.

92. Drekonja DM, Rector TS, Cutting A, Johnson JR. Urinary tract infection in male veterans: treatment patterns and outcomes. JAMA Intern Med. 2013;173(1):62-68.

93. Irvine R, Johnson BL Jr, Amstutz HC. The relationship of genitourinary tract procedures and deep sepsis after total hip replacements. Surg Gynecol Obstet. 1974;139(5):701-706.

94. Garibaldi RA, Burke JP, Dickman ML, Smith CB. Factors predisposing to bacteriuria during indwelling urethral catheterization. N Engl J Med. 1974;291(5):215-219.

95. Kunin CM, McCormack RC. Prevention of catheter-induced urinary-tract infections by sterile closed drainage. N Engl J Med. 1966;274(21):1155-1161.

96. Jerry GJ Jr, Rand JA, Ilstrup D. Old sepsis prior to total knee arthroplasty. Clin Orthop Relat Res. 1988;(236):135-140.

97. Lee GC, Pagnano MW, Hanssen AD. Total knee arthroplasty after prior bone or joint sepsis about the knee. Clin Orthop Relat Res. 2002;(404):226-231.

98. Larson AN, Hanssen AD, Cass JR. Does prior infection alter the outcome of TKA after tibial plateau fracture? Clin Orthop Relat Res. 2009;467(7):1793-1799.

99. Michelson JD, Lotke PA, Steinberg ME. Urinary-bladder management after total joint-replacement surgery. N Engl J Med. 1988;319(6):321-326.

100. Martinez OV, Civetta JM, Anderson K, Roger S, Murtha M, Malinin TI. Bacteriuria in the catheterized surgical intensive care patient. Crit Care Med. 1986;14(3):188-191.

101. Schaeffer AJ. Catheter-associated bacteriuria. Urol Clin North Am. 1986;13(4):735-747.

102. Skelly JM, Guyatt GH, Kalbfleisch R, Singer J, Winter L. Management of urinary retention after surgical repair of hip fracture. CMAJ. 1992;146(7):1185-1189.

103. Donovan TL, Gordon RO, Nagel DA. Urinary infections in total hip arthroplasty. Influences of prophylactic cephalosporins and catheterization. J Bone Joint Surg Am. 1976;58(8):1134-1137.

104. Fitzgerald RH Jr, Nolan DR, Ilstrup DM, Van Scoy RE, Washington JA 2nd, Coventry MB. Deep wound sepsis following total hip arthroplasty. J Bone Joint Surg Am. 1977;59(7):847-855.

105. Surin VV, Sundholm K, Backman L. Infection after total hip replacement. With special reference to a discharge from the wound. J Bone Joint Surg Br. 1983;65(4):412-418.

106. Felippe WA, Werneck GL, Santoro-Lopes G. Surgical site infection among women discharged with a drain in situ after breast cancer surgery. World J Surg. 2007;31(12):2293-2299; discussion 2300-2291.

107. Lanier ST, Wang ED, Chen JJ, et al. The effect of acellular dermal matrix use on complication rates in tissue expander/implant breast reconstruction. Ann Plast Surg. 2010;64(5):674-678.

108. Sorensen AI, Sorensen TS. Bacterial growth on suction drain tips. Prospective study of 489 clean orthopedic operations. Acta Orthop Scand. 1991;62(5):451-454.

109. van den Brand IC, Castelein RM. Total joint arthroplasty and incidence of postoperative bacteriuria with an indwelling catheter or intermittent catheterization with one-dose antibiotic prophylaxis: a prospective randomized trial. J Arthroplasty. 2001;16(7):850-855.

110. Oishi CS, Williams VJ, Hanson PB, Schneider JE, Colwell CW Jr, Walker RH. Perioperative bladder management after primary total hip arthroplasty. J Arthroplasty. 1995;10(6):732-736.

111. Koulouvaris P, Sculco P, Finerty E, Sculco T, Sharrock NE. Relationship between perioperative urinary tract infection and deep infection after joint arthroplasty. Clin Orthop Relat Res. 2009;467(7):1859-1867.

112. Brahmbhatt RD, Huebner M, Scow JS, et al. National practice patterns in preoperative and postoperative antibiotic prophylaxis in breast procedures requiring drains: survey of the American Society of Breast Surgeons. Ann Surg Oncol. 2012;19(10):3205-3211.

113. Phillips BT, Wang ED, Mirrer J, et al. Current practice among plastic surgeons of antibiotic prophylaxis and closed-suction drains in breast reconstruction: experience, evidence, and implications for postoperative care. Ann Plast Surg. 2011;66(5):460-465.

114. Turano A. New clinical data on the prophylaxis of infections in abdominal, gynecologic, and urologic surgery. Multicenter Study Group. Am J Surg. 1992;164(4A Suppl):16S-20S.

115. Niederhauser U, Vogt M, Vogt P, Genoni M, Kunzli A, Turina MI. Cardiac surgery in a high-risk group of patients: is prolonged postoperative antibiotic prophylaxis effective? J Thorac Cardiovasc Surg. 1997;114(2):162-168.

116. Wymenga AB, Hekster YA, Theeuwes A, Muytjens HL, van Horn JR, Slooff TJ. Antibiotic use after cefuroxime prophylaxis in hip and knee joint replacement. Clin Pharmacol Ther. 1991;50(2):215-220.

117. McDonald M, Grabsch E, Marshall C, Forbes A. Single- versus multiple-dose antimicrobial prophylaxis for major surgery: a systematic review. Aust N Z J Surg. 1998;68(6):388-396.

118. Heydemann JS, Nelson CL. Short-term preventive antibiotics. Clin Orthop Relat Res. 1986;(205):184-187.

119. Stone HH, Haney BB, Kolb LD, Geheber CE, Hooper CA. Prophylactic and preventive antibiotic therapy: timing, duration and economics. Ann Surg. 1979;189(6):691-699.

120. Williams DN, Gustilo RB. The use of preventive antibiotics in orthopaedic surgery. Clin Orthop Relat Res. 1984;(190):83-88.

121. Tang WM, Chiu KY, Ng TP, Yau WP, Ching PT, Seto WH. Efficacy of a single dose of cefazolin as a prophylactic antibiotic in primary arthroplasty. J Arthroplasty. 2003;18(6):714-718.

122. Sharma D, Douglas J, Coulter C, Weinrauch P, Crawford R. Microbiology of infected arthroplasty: implications for empiric peri-operative antibiotics. J Orthop Surg (Hong Kong). 2008;16(3):339-342.

123. Nickinson RS, Board TN, Gambhir AK, Porter ML, Kay PR. The microbiology of the infected knee arthroplasty. Int Orthop. 2010;34(4):505-510.

124. Bengston S, Knutson K, Lidgren L. Treatment of infected knee arthroplasty. Clin Orthop Relat Res. 1989;(245):173-178.

125. Peersman G, Laskin R, Davis J, Peterson M. Infection in total knee replacement: a retrospective review of 6489 total knee replacements. Clin Orthop Relat Res. 2001;(392):15-23.

126. Mont MA, Waldman BJ, Hungerford DS. Evaluation of preoperative cultures before second-stage reimplantation of a total knee prosthesis complicated by infection. A comparison-group study. J Bone Joint Surg Am. 2000;82-A(11):1552-1557.

127. Rafiq I, Gambhir AK, Wroblewski BM, Kay PR. The microbiology of infected hip arthroplasty. Int Orthop. 2006;30(6):532-535.

128. Al-Maiyah M, Hill D, Bajwa A, et al. Bacterial contaminants and antibiotic prophylaxis in total hip arthroplasty. J Bone Joint Surg Br. 2005;87(9):1256-1258.

129. Phillips JE, Crane TP, Noy M, Elliott TS, Grimer RJ. The incidence of deep prosthetic infections in a specialist orthopaedic hospital: a 15-year prospective survey. J Bone Joint Surg Br. 2006;88(7):943-948.

130. Tsukayama DT, Estrada R, Gustilo RB. Infection after total hip arthroplasty. A study of the treatment of one hundred and six infections. J Bone Joint Surg Am. 1996;78(4):512-523.

131. Moran E, Masters S, Berendt AR, McLardy-Smith P, Byren I, Atkins BL. Guiding empirical antibiotic therapy in orthopaedics: The microbiology of prosthetic joint infection managed by debridement, irrigation and prosthesis retention. J Infect. 2007;55(1):1-7.

132. Azzam K, McHale K, Austin M, Purtill JJ, Parvizi J. Outcome of a second two-stage reimplantation for periprosthetic knee infection. Clin Orthop Relat Res. 2009;467(7):1706-1714.

133. Kalra KP, Lin KK, Bozic KJ, Ries MD. Repeat 2-stage revision for recurrent infection of total hip arthroplasty. J Arthroplasty. 2010;25(6):880-884.

134. Jamsen E, Stogiannidis I, Malmivaara A, Pajamaki J, Puolakka T, Konttinen YT. Outcome of prosthesis exchange for infected knee arthroplasty: the effect of treatment approach. Acta Orthop. 2009;80(1):67-77.

135. Kubista B, Hartzler RU, Wood CM, Osmon DR, Hanssen AD, Lewallen DG. Reinfection after two-stage revision for periprosthetic infection of total knee arthroplasty. Int Orthop. 2012;36(1):65-71.

136. Mortazavi SM, O'Neil JT, Zmistowski B, Parvizi J, Purtill JJ. Repeat 2-stage exchange for infected total hip arthroplasty: a viable option? J Arthroplasty. 2012;27(6):923-926 e921.

137. Fletcher N, Sofianos D, Berkes MB, Obremskey WT. Prevention of perioperative infection. J Bone Joint Surg Am. 2007;89(7):1605-1618.

138. Dellinger EP, Gross PA, Barrett TL, et al. Quality standard for antimicrobial prophylaxis in surgical procedures. The Infectious Diseases Society of America. Infect Control Hosp Epidemiol. 1994;15(3):182-188.

139. Scher KS. Studies on the duration of antibiotic administration for surgical prophylaxis. Am Surg. 1997;63(1):59-62.

140. Shapiro M, Munoz A, Tager IB, Schoenbaum SC, Polk BF. Risk factors for infection at the operative site after abdominal or vaginal hysterectomy. N Engl J Med. 1982;307(27):1661-1666.

141. Polk HC Jr, Trachtenberg L, Finn MP. Antibiotic activity in surgical incisions. The basis of prophylaxis in selected operations. JAMA. 1980;244(12):1353-1354.

142. Ohge H, Takesue Y, Yokoyama T, et al. An additional dose of cefazolin for intraoperative prophylaxis. Surg Today. 1999;29(12):1233-1236.

143. Morita S, Nishisho I, Nomura T, et al. The significance of the intraoperative repeated dosing of antimicrobials for preventing surgical wound infection in colorectal surgery. Surg Today. 2005;35(9):732-738.

144. Swoboda SM, Merz C, Kostuik J, Trentler B, Lipsett PA. Does intraoperative blood loss affect antibiotic serum and tissue concentrations? Arch Surg. 1996;131(11):1165-1171; discussion 1171-1162.

145. Markantonis SL, Kostopanagiotou G, Panidis D, Smirniotis V, Voros D. Effects of blood loss and fluid volume replacement on serum and tissue gentamicin concentrations during colorectal surgery. Clin Ther. 2004;26(2):271-281.

146. Klekamp JW, DiPersio D, Haas DW. No influence of large volume blood loss on serum vancomycin concentrations during orthopedic procedures. Acta Orthop Scand. 1999;70(1):47-50.

147. Meter JJ, Polly DW Jr, Brueckner RP, Tenuta JJ, Asplund L, Hopkinson WJ. Effect of intraoperative blood loss on the serum level of cefazolin in patients managed with total hip arthroplasty. A prospective, controlled study. J Bone Joint Surg Am. 1996;78(8):1201-1205.

148. Polly DW Jr, Meter JJ, Brueckner R, Asplund L, van Dam BE. The effect of intraoperative blood loss on serum cefazolin level in patients undergoing instrumented spinal fusion. A prospective, controlled study. Spine (Phila Pa 1976). 1996;21(20):2363-2367.

149. Gilbert DN, Moellering RC, Sande MA. The Sanford Guide to Antimicrobial Therapy. 30th ed. Hyde Park, VT: Antimicrobial Therapy, Inc; 2000.

150. Wurtz R, Itokazu G, Rodvold K. Antimicrobial dosing in obese patients. Clin Infect Dis. 1997;25(1):112-118.

151. Leader WG, Tsubaki T, Chandler MH. Creatinine-clearance estimates for predicting gentamicin pharmacokinetic values in obese patients. Am J Hosp Pharm. 1994;51(17):2125-2130.

152. Begg EJ, Barclay ML, Duffull SB. A suggested approach to once-daily aminoglycoside dosing. Br J Clin Pharmacol. 1995;39(6):605-609.

153. Janson B, Thursky K. Dosing of antibiotics in obesity. Curr Opin Infect Dis. 2012;25(6):634-649.

154. Truong J, Levkovich BJ, Padiglione AA. Simple approach to improving vancomycin dosing in intensive care: a standardised loading dose results in earlier therapeutic levels. Intern Med J. 2012;42(1):23-29.

155. Ho VP, Nicolau DP, Dakin GF, et al. Cefazolin dosing for surgical prophylaxis in morbidly obese patients. Surg Infect (Larchmt). 2012;13(1):33-37.

156. Rybak MJ, Lomaestro BM, Rotschafer JC, et al. Vancomycin therapeutic guidelines: a summary of consensus recommendations from the infectious diseases Society of America, the American Society of Health-System Pharmacists, and the Society of Infectious Diseases Pharmacists. Clin Infect Dis. 2009;49(3):325-327.

157. Traynor AM, Nafziger AN, Bertino JS Jr. Aminoglycoside dosing weight correction factors for patients of various body sizes. Antimicrob Agents Chemother. 1995;39(2):545-548.

158. van Kralingen S, Taks M, Diepstraten J, et al. Pharmacokinetics and protein binding of cefazolin in morbidly obese patients. Eur J Clin Pharmacol. 2011;67(10):985-992.

159. Edmiston CE, Krepel C, Kelly H, et al. Perioperative antibiotic prophylaxis in the gastric bypass patient: do we achieve therapeutic levels? Surgery. 2004;136(4):738-747.

160. Liu C. The bundled approach to MRSA surgical site infection prevention: is the whole greater than the sum of its parts?: comment on "Sustained reduction in methicillin-resistant Staphylococcus aureus wound infections after cardiothoracic surgery". Arch Intern Med. 2011;171(1):73-74.

161. Pofahl WE, Goettler CE, Ramsey KM, Cochran MK, Nobles DL, Rotondo MF. Active surveillance screening of MRSA and eradication of the carrier state decreases surgical-site infections caused by MRSA. J Am Coll Surg. 2009;208(5):981-986; discussion 986-988.

162. Wirganowicz PZ, Eckardt JJ, Dorey FJ, Eilber FR, Kabo JM. Etiology and results of tumor endoprosthesis revision surgery in 64 patients. Clin Orthop Relat Res. 1999;(358):64-74.

163. Safran MR, Kody MH, Namba RS, et al. 151 endoprosthetic reconstructions for patients with primary tumors involving bone. Contemp Orthop. 1994;29(1):15-25.

164. Malawer MM, Chou LB. Prosthetic survival and clinical results with use of large-segment replacements in the treatment of high-grade bone sarcomas. J Bone Joint Surg Am. 1995;77(8):1154-1165.

165. Capanna R, Morris HG, Campanacci D, Del Ben M, Campanacci M. Modular uncemented prosthetic reconstruction after resection of tumours of the distal femur. J Bone Joint Surg Br. 1994;76(2):178-186.

166. Mittermayer F, Krepler P, Dominkus M, et al. Long-term followup of uncemented tumor endoprostheses for the lower extremity. Clin Orthop Relat Res. 2001;(388):167-177.

167. Ghert M, Deheshi B, Holt G, et al. Prophylactic antibiotic regimens in tumour surgery (PARITY): protocol for a multicentre randomised controlled study. BMJ Open. 2012;2(6).

168. Jansen B, Rinck M, Wolbring P, Strohmeier A, Jahns T. In vitro evaluation of the antimicrobial efficacy and biocompatibility of a silver-coated central venous catheter. J Biomater Appl. 1994;9(1):55-70.

169. Karchmer TB, Giannetta ET, Muto CA, Strain BA, Farr BM. A randomized crossover study of silver-coated urinary catheters in hospitalized patients. Arch Intern Med. 2000;160(21):3294-3298.

170. Tsuchiya H, Shirai T, Nishida H. New implant technology:iodine-coating for infection control. Paper presented at: 26th European Musculoskeletal Oncology Society Meeting, 2013; Gothenburg, Sweden.

171. Tsuchiya H, Shirai T, Nishida H, et al. Innovative antimicrobial coating of titanium implants with iodine. J Orthop Sci. 2012;17(5):595-604.

172. Gosheger G, Hardes J, Ahrens H, et al. Silver-coated megaendoprostheses in a rabbit model--an analysis of the infection rate and toxicological side effects. Biomaterials. 2004;25(24):5547-5556.

173. Hardes J, von Eiff C, Streitbuerger A, et al. Reduction of periprosthetic infection with silver-coated megaprostheses in patients with bone sarcoma. J Surg Oncol. 2010;101(5):389-395.

174. Gosheger G, Goetze C, Hardes J, Joosten U, Winkelmann W, von Eiff C. The influence of the alloy of megaprostheses on infection rate. J Arthroplasty. 2008;23(6):916-920.

175. Witso E, Persen L, Benum P, Aamodt A, Husby OS, Bergh K. High local concentrations without systemic adverse effects after impaction of netilmicin-impregnated bone. Acta Orthop Scand. 2004;75(3):339-346.

176. Buttaro MA, Gimenez MI, Greco G, Barcan L, Piccaluga F. High active local levels of vancomycin without nephrotoxicity released from impacted bone allografts in 20 revision hip arthroplasties. Acta Orthop. 2005;76(3):336-340.

177. Buttaro MA, Pusso R, Piccaluga F. Vancomycin-supplemented impacted bone allografts in infected hip arthroplasty. Two-stage revision results. J Bone Joint Surg Br. 2005;87(3):314-319.

178. Michalak KA, Khoo PP, Yates PJ, Day RE, Wood DJ. Iontophoresed segmental allografts in revision arthroplasty for infection. J Bone Joint Surg Br. 2006;88(11):1430-1437.

179. Khoo PP, Michalak KA, Yates PJ, Megson SM, Day RE, Wood DJ. Iontophoresis of antibiotics into segmental allografts. J Bone Joint Surg Br. 2006;88(9):1149-1157.

180. Winkler H, Stoiber A, Kaudela K, Winter F, Menschik F. One stage uncemented revision of infected total hip replacement using cancellous allograft bone impregnated with antibiotics. J Bone Joint Surg Br. 2008;90(12):1580-1584.

181. Buttaro MA, Guala AJ, Comba F, Suarez F, Piccaluga F. Incidence of deep infection in aseptic revision THA using vancomycin-impregnated impacted bone allograft. Hip Int. 2010;20(4):535-541.

182. Witso E, Persen L, Loseth K, Bergh K. Adsorption and release of antibiotics from morselized cancellous bone. In vitro studies of 8 antibiotics. Acta Orthop Scand. 1999;70(3):298-304.

183. Buttaro MA, Gonzalez Della Valle AM, Pineiro L, Mocetti E, Morandi AA, Piccaluga F. Incorporation of vancomycin-supplemented bone incorporation of vancomycin-supplemented bone allografts: radiographical, histopathological and immunohistochemical study in pigs. Acta Orthop Scand. 2003;74(5):505-513.

184. Witso E, Persen L, Loseth K, Benum P, Bergh K. Cancellous bone as an antibiotic carrier. Acta Orthop Scand. 2000;71(1):80-84.

185. Berbari EF, Hanssen AD, Duffy MC, et al. Risk factors for prosthetic joint infection: case-control study. Clin Infect Dis. 1998;27(5):1247-1254.

186. Yang K, Yeo SJ, Lee BP, Lo NN. Total knee arthroplasty in diabetic patients: a study of 109 consecutive cases. J Arthroplasty. 2001;16(1):102-106.

187. Meding JB, Reddleman K, Keating ME, et al. Total knee replacement in patients with diabetes mellitus. Clin Orthop Relat Res. 2003;(416):208-216.

188. Pedersen AB, Mehnert F, Johnsen SP, Sorensen HT. Risk of revision of a total hip replacement in patients with diabetes mellitus: a population-based follow up study. J Bone Joint Surg Br. 2010;92(7):929-934.

189. Adams AL, Paxton EW, Wang JQ, et al. Surgical outcomes of total knee replacement according to diabetes status and glycemic control, 2001 to 2009. J Bone Joint Surg Am. 20 2013;95(6):481-487.

190. Haverkamp D, Klinkenbijl MN, Somford MP, Albers GH, van der Vis HM. Obesity in total hip arthroplasty--does it really matter? A meta-analysis. Acta Orthop. 2011;82(4):417-422.

191. Namba RS, Paxton L, Fithian DC, Stone ML. Obesity and perioperative morbidity in total hip and total knee arthroplasty patients. J Arthroplasty. 2005;20(7 Suppl 3):46-50.

192. Dowsey MM, Choong PF. Early outcomes and complications following joint arthroplasty in obese patients: a review of the published reports. ANZ J Surg. 2008;78(6):439-444.

193. Parvizi J, Sullivan TA, Pagnano MW, Trousdale RT, Bolander ME. Total joint arthroplasty in human immunodeficiency virus-positive patients: an alarming rate of early failure. J Arthroplasty. 2003;18(3):259-264.

194. Ragni MV, Crossett LS, Herndon JH. Postoperative infection following orthopaedic surgery in human immunodeficiency virus-infected hemophiliacs with CD4 counts < or = 200/mm3. J Arthroplasty. 1995;10(6):716-721.

195. Habermann B, Eberhardt C, Kurth AA. Total joint replacement in HIV positive patients. J Infect. 2008;57(1):41-46.

196. Wang TI, Chen CF, Chen WM, et al. Joint replacement in human immunodeficiency virus-infected patients. J Chin Med Assoc. 2012;75(11):595-599.

197. Unger AS, Kessler CM, Lewis RJ. Total knee arthroplasty in human immunodeficiency virus-infected hemophiliacs. J Arthroplasty. 1995;10(4):448-452.

198. Silva M, Luck JV Jr. Long-term results of primary total knee replacement in patients with hemophilia. J Bone Joint Surg Am. 2005;87(1):85-91.

199. Rodriguez-Merchan EC. Total knee replacement in haemophilic arthropathy. J Bone Joint Surg Br. 2007;89(2):186-188.

200. Shaarani SR, Collins D, O'Byrne JM. The need for guidelines in asplenic patients undergoing total joint arthroplasty: a case report. Case Rep Orthop. 2012;2012:147042.

201. McCleery MA, Leach WJ, Norwood T. Rates of infection and revision in patients with renal disease undergoing total knee replacement in Scotland. J Bone Joint Surg Br. 2010;92(11):1535-1539.

202. Lieberman JR, Fuchs MD, Haas SB, et al. Hip arthroplasty in patients with chronic renal failure. J Arthroplasty. 1995;10(2):191-195.

203. Sakalkale DP, Hozack WJ, Rothman RH. Total hip arthroplasty in patients on long-term renal dialysis. J Arthroplasty. 1999;14(5):571-575.

204. Li WC, Shih CH, Ueng SW, Shih HN, Lee MS, Hsieh PH. Uncemented total hip arthroplasty in chronic hemodialysis patients. Acta Orthop. 2010;81(2):178-182.

205. Nagoya S, Nagao M, Takada J, Kuwabara H, Kaya M, Yamashita T. Efficacy of cementless total hip arthroplasty in patients on long-term hemodialysis. J Arthroplasty. 2005;20(1):66-71.

206. Pour AE, Matar WY, Jafari SM, Purtill JJ, Austin MS, Parvizi J. Total joint arthroplasty in patients with hepatitis C. J Bone Joint Surg Am. 2011;93(15):1448-1454.

207. Orozco F, Post ZD, Baxi O, Miller A, Ong A. Fibrosis in Hepatitis C Patients Predicts Complications After Elective Total Joint Arthroplasty. J Arthroplasty. 2013. pii: S0883-5403(13)00265-9.

208. Vergidis P, Lesnick TG, Kremers WK, Razonable RR. Prosthetic joint infection in solid organ transplant recipients: a retrospective case-control study. Transpl Infect Dis. 2012;14(4):380-386.

209. Tannenbaum DA, Matthews LS, Grady-Benson JC. Infection around joint replacements in patients who have a renal or liver transplantation. J Bone Joint Surg Am. 1997;79(1):36-43.

210. Mortazavi SM, Molligan J, Austin MS, Purtill JJ, Hozack WJ, Parvizi J. Failure following revision total knee arthroplasty: infection is the major cause. Int Orthop. 2011;35(8):1157-1164.

211. Poss R, Thornhill TS, Ewald FC, Thomas WH, Batte NJ, Sledge CB. Factors influencing the incidence and outcome of infection following total joint arthroplasty. Clin Orthop Relat Res. 1984;(182):117-126.

212. Sierra RJ, Cooney WP, Pagnano MW, Trousdale RT, Rand JA. Reoperations after 3200 revision TKAs: rates, etiology, and lessons learned. Clin Orthop Relat Res. 2004;(425):200-206.

213. Liu C, Kakis A, Nichols A, Ries MD, Vail TP, Bozic KJ. Targeted Use of Vancomycin as Perioperative Prophylaxis Reduces Periprosthetic Joint Infection in Revision TKA. Clin Orthop Relat Res. 2013 May 4 [Epub ahead of print].

214. Nordmann P, Cuzon G, Naas T. The real threat of Klebsiella pneumoniae carbapenemase-producing bacteria. Lancet Infect Dis. 2009;9(4):228-236.

215. Queenan AM, Bush K. Carbapenemases: the versatile beta-lactamases. Clin Microbiol Rev. 2007;20(3):440-458, table of contents.

216. Schwaber MJ, Carmeli Y. Carbapenem-resistant Enterobacteriaceae: a potential threat. JAMA. 2008;300(24):2911-2913.

217. Bratu S, Landman D, Haag R, et al. Rapid spread of carbapenem-resistant Klebsiella pneumoniae in New York City: a new threat to our antibiotic armamentarium. Arch Intern Med. 2005;165(12):1430-1435.

218. Marchaim D, Navon-Venezia S, Schwaber MJ, Carmeli Y. Isolation of imipenem-resistant Enterobacter species: emergence of KPC-2 carbapenemase, molecular characterization, epidemiology, and outcomes. Antimicrob Agents Chemother. 2008;52(4):1413-1418.

219. Cuzon G, Naas T, Demachy MC, Nordmann P. Plasmid-mediated carbapenem-hydrolyzing beta-lactamase KPC-2 in Klebsiella pneumoniae isolate from Greece. Antimicrob Agents Chemother. 2008;52(2):796-797.

220. de Smet AM, Kluytmans JA, Cooper BS, et al. Decontamination of the digestive tract and oropharynx in ICU patients. N Engl J Med. 2009;360(1):20-31.

221. Perez F, Pultz MJ, Endimiani A, Bonomo RA, Donskey CJ. Effect of antibiotic treatment on establishment and elimination of intestinal colonization by KPC-producing Klebsiella pneumoniae in mice. Antimicrob Agents Chemother. 2011;55(6):2585-2589.

**Workgroup 4: Operative Environment**

**Liaisons:**

Pouya Alijanipour MD, Joseph Karam MD

**Leaders:**

Adolfo Llinás MD (International), Kelly G Vince MD (International), Charalampos Zalavras MD (US)

**Delegates:**

Matthew Austin MD, Grant Garrigues MD, Snir Heller MD, James Huddleston MD, Brian Klatt MD, Viktor Krebs MD, Christoph Lohmann MD, Edward J McPherson MD, Robert Molloy MD, Ali Oliashirazi MD, Mitchell Schwaber MD, Eoin Sheehan MD, Eric Smith MD, Robert Sterling MD, Gregory Stocks MD, Shrinand Vaidya MD

**Question 1: Do numbers of bacteria arriving in the surgical wound correlate directly with the probability of surgical site infection (SSI)?**

**Consensus:** We recognize that the probability of SSI correlates directly with the quantity of bacteria that reach the wound. Accordingly we support strategies to lower particulate and bacterial counts at surgical wounds.

**Delegate Vote:** Agree: 97%, Disagree: 2%, Abstain: 1% (Strong Consensus)

**Justification:** Postoperative SSIs are believed to occur via bacterial inoculation at the time of surgery or as a result of bacterial contamination of the wound via open pathways to the deep tissue layers.1-3 The probability of SSI is reflected by interaction of parameters that can be categorized into three major groups.2 The first group consists of factors related to the ability of bacteria to cause infection and include initial inoculation load and genetically determined virulence factors that are required for adherence, reproduction, toxin production, and bypassing host defense mechanisms. The second group involves those factors related to the defense capacity of the host including local and systemic defense mechanisms. The last group contains environmental determinants of exposure such as size, time, and location of the surgical wound that can provide an opportunity for the bacteria to enter the surgical wound, overcome the local defense system, sustain their presence, and replicate and initiate local as well as systemic inflammatory reactions of the host.

The use of iodine impregnated skin incise drapes shows decreased skin bacterial counts but no correlation has been established with SSI. However, no recommendations regarding the use of skin barriers can be made (see Workgroup 4, Question 27).

**Question 2: Do numbers of bacteria in the operating room (OR) environment correlate directly with the probability of SSI?**

**Consensus:** We recognize that airborne particulate bacteria are a major source of contamination in the OR environment and that bacteria shed by personnel are the predominant source of these particles. The focus of our recommendations is to reduce the volume of bacteria in the OR with particular attention to airborne particles.­­­

**Delegate Vote:** Agree: 93%, Disagree: 5%, Abstain: 2% (Strong Consensus)

**Justification:** Air is a potential source of contamination in the OR.2, 4 Studies have demonstrated that the number of airborne bacteria around the wound is correlated to the incidence of periprosthetic joint infection (PJI).1 It has been suggested that if it was possible to measure accurately the number of bacteria present in the wound it should constitute the most precise predictor of subsequent infection.5 Bacteria can be considered as part of the total mass of particulates in the air. Some studies have suggested that the airborne particulate count should be considered as potential surrogate for airborne microbial density.6 Others have found a correlation between the number of particulates > 10 μm with the density of viable bacteria at the site of surgery (measured by colony-forming units).7 It has been suggested that monitoring particulate count be used as a real-time proxy for increased risk of wound contamination or infection.7 Persons in the OR are a major source of bacterial load and shed bacterial particulates. These particulates circulate through the OR via air currents. Movements of personnel and objects (including OR equipment) and opening and closing doors can generate significantly marked air currents and increase the probability of bacteria being deposited in the surgical site.3, 8

**Question 3: Should the OR in which an elective arthroplasty is performed be fitted with laminar** **air flow** **(LAF)?**

**Consensus:** We believe that arthroplasty surgery may be performed in operating theaters without laminar flow. Laminar flow rooms and other strategies that may reduce particulates in operating rooms would be expected to reduce particulate load. Studies have not shown lower SSI in laminar flow rooms and some cases are associated with increased rates of SSI. These are complex technologies that must function in strict adherence to maintenance protocols. We recommend further investigation in this field.

**Delegate Vote:** Agree: 85%, Disagree: 7%, Abstain: 8% (Strong Consensus)

**Justification:** The most cited studies supporting the use of LAF were conducted in the 1970s and 1980s by Charnley and Lidwell et al.9,10 However, several recent studies have shown no clear benefit of LAF in reducing the incidence of deep SSI.11-14 Breier et al. conducted a nationwide study in Germany, controlling for confounding factors with multivariate analysis, and found no independent effect of LAF on SSI rates, even when considering LAF rooms with large ceiling sizes (at least 3.2 m x 3.2 m).11

A recent study by Hooper et al. that was based on the New Zealand joint registry evaluated the subject on a wide basis.13 The authors analyzed 51,485 total hip arthroplasties (THA) and 36,826 total knee arthroplasties (TKA) and revealed increased early infection rates with laminar flow use, especially for THA patients. This increase was found to be independent of patient characteristics, operative time, surgeon, or institution. Unfortunately, except for the study performed by Salvati et al. in which horizontal LAF was found to increase the risk of PJI in TKA, other studies, including those supporting the use of LAF,10 those opposing its use,13 and those with indifferent results,15-17 did not conduct any subanalysis to distinguish influence of different types of LAF on PJI.

**Question 4: Is there enough evidence to enforce the universal use of body exhaust suits during total joint arthroplasty (TJA)?**

**Consensus:** There is currently no conclusive evidence to support the routine use of space suits in performing TJA.

**Delegate Vote:** Agree: 84%, Disagree: 11%, Abstain: 5% (Strong Consensus)

**Justification:** Similar to the situation with laminar flow, the use of space suits during TJA has become a subject of controversy. A recent study by Miner et al. showed no benefit in the use of body exhaust suits14 and a study by Hooper et al. evaluating the use of a space suit and its effect on early infection rates identified an increased rate of early infection with the use of space suits both in conventional and in laminar flow theaters.13 However, there is some suggestion that space suits should be worn in laminar flow-fitted rooms to prevent contamination.18,19

**Question 5: What strategies should be implemented regarding OR traffic?**

**Consensus:** We recommend that OR traffic should be kept to a minimum.

**Delegate Vote:** Agree: 100%, Disagree: 0%, Abstain: 0% (Unanimous Consensus)

**Justification:** Personnel are the major source of air contamination in the OR, both by traffic that creates turbulence and contaminates ultraclean air and by bacterial shedding. Ritter et al. showed that bacterial counts in OR air increased 34-fold in an operating room with five people compared to an empty room.17 Keeping the OR door open also significantly increased bacterial air contamination of the room in the same study. Andersson et al. showed a positive correlation between traffic flow rates and air bacterial counts in orthopaedic procedures.15 They also identified a direct correlation between the number of people present in the OR and bacterial counts. Quraishi et al. further demonstrated a direct correlation between the activity level of OR personnel and bacterial fallout into the sterile field. 20 Panahi et al. observed door openings during primary and revision TJA cases.21 They identified 0.65 and 0.84 door openings per minute in primary and revision cases, respectively. The main personnel responsible for door openings were implant technical representatives and circulating nurses. Lynch et al. showed an exponential relationship between the number of door openings and the number of personnel in the OR. In their series, information requests (an easily avoidable cause) was the reason for the majority of door openings.22 Multiple door openings can result in a drop in the pressure gradient requiring more air being pumped through LAF systems and therefore the high efficiency particulate air filters are consumed more quickly. It has been proposed by experts that OR personnel pass through a substerile hallway every time they enter or leave the OR, although evidence regarding this practice is lacking. If preoperative templating is possible, available sizes of the implants should be in the OR at the start of the surgery.

**Question 6: Should operating lights be controlled with a foot pedal as opposed to reaching above eye level?**

**Consensus:** We recommend a general awareness that light handles can be a source of contamination and to minimize handling of lights as much as possible. Other strategies for light control need to be developed in the future to minimize contamination.

**Delegate Vote:** Agree: 91%, Disagree: 4%, Abstain: 5% (Strong Consensus)

**Justification:** Davis et al. identified a 14.5% rate of contamination of sterile light handles during TJA cases.23 Hussein et al. showed no evidence of contamination of the sterile light handle (autoclaved plastic or metallic) after 15 cases of primary TJA.24 However, we were unable to identify other studies in the literature addressing the risk of contamination of the surgeon's gown or of parts of the sterile field when compared with reaching up for light adjustment, or studies that looked at air disruptions secondary to the movement of the surgeon reaching above eye level.

**Question 7: Is there a role for ultraviolet (UV) light use in the prevention of infection after TJA?**

**Consensus:** We agree that UV light environments can lower infection rates, but recognize that this can pose a risk to OR personnel. We recognize that the benefit of UV might be the inhibition of operating traffic.

**Delegate Vote:** Agree: 74%, Disagree: 13%, Abstain: 13% (Strong Consensus)

**Justification:** Even though UV light use has been shown to significantly decrease the number of bacterial counts in the OR, as well as the occurrence of postoperative infection, its use is harmful for OR personnel and increases the risk of corneal injuries and skin cancer; as such, current guidelines from the Centers for Disease Control and Prevention (CDC) recommend against the use of UV lights in the OR to prevent SSIs.5, 25-30

**Question 8: Do UV decontamination/sterilization lights or portable units in unoccupied ORs (nights and weekends) make a difference in the sterility of the OR environment?**

**Consensus:** UV would be expected to lower bacterial load in ORs, but the technology has not been studied in this application. It might be considered an adjunct but not a replacement for conventional cleaning. There are potential risks to staff by UV technology inadvertently left on at the start of the work day.

**Delegate Vote:** Agree: 84%, Disagree: 3%, Abstain: 13% (Strong Consensus)

**Justification:** After a thorough literature search, we were unable to identify evidence to support or refute the use of UV light to keep the OR environment sterile outside operative times.

**Question 9: Should the patient and OR personnel wear a mask to avoid contamination of the OR air?**

**Consensus:** Despite the absence of conclusive studies that show a reduction in SSI when surgical masks are worn properly and uniformly by all staff, we believe there is reason to expect particulate airborne bacteria counts to be reduced by disciplined use of surgical masks. Until evidence appears that shows an advantage to NOT wearing a mask, we believe that it is in the interest of patient safety that all personnel wear surgical masks at all time that they are in the OR. There is insufficient evidence to support the use of masks by patients that outweighs the benefit of airway access.

**Delegate Vote:** Agree: 85%, Disagree: 7%, Abstain: 8% (Strong Consensus)

**Justification:** Several authors have questioned the utility of face masks worn by OR personnel in preventing air and wound contamination.31-33 A study by Lipp and Edwards included three randomized controlled trials (RCTs) with a total of 2113 subjects and concluded that the use of face masks had no significant effect on surgical wound infections in patients undergoing clean surgery.32 Sellden et al. decided to refrain from the use of face masks for unscrubbed personnel in the OR.34 A recent RCT by Webster et al. showed that if none of the nonscrubbed OR personnel wore a face mask, there was no increase in the rate of SSIs. However, this study included nonorthopaedic as well as orthopaedic procedures and followed patients for only 6 weeks postoperatively.35 Furthermore, it was not clear if orthopaedic procedures included implantation procedures. We were unable to identify studies looking specifically at face masks worn by the patient undergoing TJA or studies evaluating the benefit of this practice in reducing OR air contamination.

**Question 10: What garments are required for OR personnel?**

**Consensus:** We recommend that all personnel wear clean theater attire including a disposable head covering, when entering an OR. Garments worn outside of the hospital should not be worn during TJA.

**Delegate Vote:** Agree: 98%, Disagree: 1%, Abstain: 1% (Strong Consensus)

**Justification:** Some aspects of the appropriate attire for surgical personnel (such as surgical gowns and gloves) have been addressed in other sections. Controversy has been raised regarding the utility of surgical masks or head coverings in the prevention of SSI based on inconsistent results from experimental and clinical investigations in the field of general surgery, gynecology, and cardiology (cardiac catheterization).36-42 Nevertheless, as affirmed by CDC guidelines,28 use of surgical masks by all OR personnel is an advantageous and harmless behavior that provides a mechanical obstacle for OR personnels’ oro- and nasopharyngeal secretions. These secretions may contain bacterial particulates and all efforts should be made to decrease the risk of exposure of surgical wound to these particulates. Moreover, masks can also be beneficial in protecting the personnel from patients’ blood or other bodily fluids.

**Question 11: What restrictions should be placed on the use of portable electronic devices (such as mobile phones, laptops, tablets, or music devices) in the OR?**

**Consensus:** We recognize that portable electronic devices may be contaminated with bacteria. We also recognize that increased levels of talking are associated with higher levels of bacteria in the OR environment. Accordingly we recommend that portable electronic device usage be limited to that which is necessary for patient care.

**Delegate Vote:** Agree: 84%, Disagree: 14%, Abstain: 2% (Strong Consensus)

**Justification:** Many studies have shown a high rate of contamination of cell phones and other portable electronic devices used in hospitals by healthcare workers, from 44% to 98%, with a high percentage of resistant strains, namely extended-spectrum β-lactamase-producing gram-negative bacteria and methicillin-resistant *Staphylococcus aureus* (MRSA).43-49 Ulger et al. demonstrated that 52% of *Staphylococcus aureus* strains isolated from cell phones were methicillin-resistant.48 Brady et al. showed that cleaning mobile phones with an alcohol-based solution significantly reduced contamination of mobile phones,43 similar to what was previously observed by Singh et al. for pagers50 and Hassoun et al. for personal digital assistants.51 Thus, regular cleaning of portable electronic devices with alcohol is highly recommended, as efforts towards maintaining hand hygiene to prevent nosocomial infections, including SSI, may be compromised by the use of handheld electronic devices that act as reservoirs of pathogens. Limitation of portable electronic devices in the OR is also advised, although no evidence in the literature is able to link their use to an increased risk of SSI.

**Question 12: Does prolonged surgical time predispose to an increased risk of PJI?**

**Consensus:** We recognize that SSI rates increase directly with the duration of surgery. We recognize that some surgeries present a marked and inescapable level of complexity that will require more time. We recognize that minimizing the duration of surgery is an important goal and a cooperative effort on the base of the entire surgical team as well as the institution. We recommend that a coordinated effort be made to minimize the duration of surgery without technical compromise of the procedure.

**Delegate Vote:** Agree: 96%, Disagree: 3%, Abstain: 1% (Strong Consensus)

**Justification:** Numerous studies have linked increased operative time to the risk of infection after TJA with statistical significance.52-65 Skramm et al. investigated the incidence of SSI following THA and TKA for fractures after the implementation of surveillance policies. When considering the risk factors for infection, the duration of surgery was the only significant independent factor in a logistic regression model, also taking into account age, American Society of Anesthesiologists’ physical status score, and level of emergency.61 The study by van Kasteren et al. supported the use of duration of surgery > the 75th percentile as a risk factor for PJI,64 as previously suggested by the National Noscomial Infections Surveillance risk index.66 In a population-wide study based on the Danish national hip arthroplasty registry that included 80,756 cases of primary THA, surgical time was a significant independent risk factor for revision due to infection.57 Similar results were reported in countries such as Norway and England.60,62 Peersman et al. suggested using operative times as a predictive risk factor for infection after TKA in a risk stratification model.58 In a systematic review of only observational studies that investigated deep SSI in THA and included > 100 patients, Urquhart et al found just two studies that examined operative time.54,60 After merging data from these two studies, they reported duration of surgery as an independent risk factor for SSI. In addition, in a recent analysis of 56,216 primary TKAs, Namba et al. identified a 9% increase in the risk of deep SSI per 15-minute increment increase in operative time.56

Nevertheless, methodological concerns exist regarding the studies that support the role of operative time as a risk factor for PJI, including missing data,9 failure to consider potential confounding factors,57,58 and statistical considerations.59-61 On the other hand, there are studies that failed to demonstrate such a correlation67 or even found an opposite relationship.68 Moreover, none of the previous studies considered the potential confounding role of repeat doses of antibiotic prophylaxis during prolonged procedures. Procedure duration may be an indicator of complexity of surgery (extensive surgical exposure and more severe tissue damage), surgical indication (previous procedures and indications other than osteoarthritis), inexperienced surgical team, surgeon with slow pace, perioperative complications, inadequate optimal standardization program, or patient’s preexisting medical conditions.57,69,70 Perhaps staff education in how to operate efficiently and follow systematically defined steps might decrease the risk of SSI. It has also been demonstrated that procedures with a longer duration are at increased risk for revision due to aseptic failure.62

**Question 13: Should the scheduling of elective TJA be ordered so that clean cases are not preceded by known infected, dirty, or contaminated cases?**

**Consensus:** We recognize the concern regarding risk of infection to a clean surgery following a contaminated surgery. We recognize that studies have not demonstrated increased infection rates in clean surgery performed subsequent to contaminated cases. We recommend thorough cleaning after contaminated surgery and before further surgery, as defined by local institutional standards.

**Delegate Vote:** Agree: 89%, Disagree: 8%, Abstain: 3% (Strong Consensus)

**Justification:** Although performing an infected arthroplasty procedure before noninfected procedures is theoretically risky for cross-contamination between procedures, there is inadequate evidence to support or oppose this practice. However, this policy may allow the hygiene staff a thorough clean down procedure at the end of the OR working day when there is no economical concern regarding the duration of time that might be required for a compliant OR disinfection.

A common practice in orthopaedic surgery, especially in arthroplasty, is to organize the OR in a manner so that confirmed or suspicious cases of infection are operated on at the end of the OR session after clean procedures. Whether the practice of performing a clean arthroplasty procedure following an infected case increases the probability of infection or not has not been adequately studied. Microbiologic studies have demonstrated long-term survivorship of common nosocomial pathogens on inanimate surfaces.71 This may support the theoretical risk of cross-contamination between procedures if there is no efficient preventive strategy for disinfection of these surfaces after every procedure. There are only two retrospective studies that have addressed this issue, but both had inadequate power and inconsistent conclusions.72,73 Despite the lack of evidence, a sound practice consists of thoroughly addressing this potential factor of PJI, even though there is inadequate evidence for cross-contamination between procedures.

Abolghasemian et al. evaluated 85 primary and revision cases performed after TJA resection for PJI and evaluated the risk of infection in those patients.72 After a minimum follow-up of 12 months, an increased rate of superficial or deep infections was not witnessed in this cohort when compared to 321 patients matched for demographic factors who did not undergo TJA after an infected TJA in the same OR. The one patient who developed a deep PJI in the study group had a different infecting organism than the one responsible for the PJI of the preceding surgical case. Cleaning the OR after an infected case did not differ from cleaning after an aseptic case. Namdari et al. undertook a similar endeavor when they evaluated the development of infection in 39 cases of primary TJA performed after dirty cases. They identified one case of PJI in this cohort when the causative infecting organism (*Propionibacterium acnes*) was the same as the one causing the infection in the preceding septic case. However, no advanced microbiological testing was performed to certify that both organisms were of identical strains.73

**Question 14: Does patient normothermia have an essential role in preventing infectious complications?**

**Consensus:** We recognize the significance of patient normothermia and the data from nonorthopaedic procedures. We support general recommendations from the general surgery literature and identify this as a field that requires further research.

**Delegate Vote:** Agree: 92%, Disagree: 1%, Abstain: 7% (Strong Consensus)

**Justification:** Kurz et al. undertook an RCT of major colorectal surgery patients and demonstrated significant decrease in SSI rates in patients receiving warmed fluids and forced-air warming (FAW) blankets compared to patients who did not receive aggressive maintenance of normothermia.74 Melling et al. conducted an RCT in nonorthopaedic clean surgery and identified a significant role for patient warming in preventing SSI.75 A systematic protocol using FAW blankets or local warming protocols using a radiant heat dressing led to a significant decrease in SSI. No such RCT was identified specifically for TJA or orthopaedic procedures in general.

**Question 15: Do FAW blankets increase the risk of SSI?**

**Consensus:** We recognize the theoretical risk posed by FAW blankets and that no studies have shown an increase in SSI related to the use of these devices. We recommend further study but no change to current practice.

**Delegate Vote:** Agree: 89%, Disagree: 5%, Abstain: 6% (Strong Consensus)

**Justification:** Recent studies have raised concern about the possibility of bacterial air contamination by FAW devices. Some authors evaluated disruptions in airflow. McGovern et al. conducted an experimental study where they found that FAW blankets lead to a disruption in the airflow at the surgical site under LAF conditions when compared to conductive fabric warmers in simulated THA and spine surgery.76 Legg et al. found increased air particles above the surgical site when using FAW compared to radiant warming.77 On the contrary, Sessler et al. did not identify any worsening in air quality with use of FAW under laminar flow conditions.78 Memarzadeh et al. reported the results of a computational study conducted by the National Institutes of Health which showed negligible disruption of laminar flow by FAW.79

Other authors have investigated the bacterial contamination of OR air. Moretti et al. undertook air sampling in experimental conditions and demonstrated increased bacterial contamination of air after turning FAW blankets on; however, this was much lower than worsening of air quality induced by personnel placing a patient in the OR.80 Tumia et al. undertook air sampling under LAF conditions in orthopaedic procedures and failed to identify any significant rise in air bacterial counts with the use of FAW.81 Sharp et al. also performed air sampling in LAF-equipped ORs to study the effect of FAW on air quality using volunteer patients with psoriasis who had increased shedding of skin cells.82 Air at 30 cm from a theoretical operating site was sampled and there were no positive cultures. In addition, a smoke test that was used to visually assess airflow found no disturbance by the FAW device. Zink et al. were also concerned by possible contamination of the OR environment with FAW, but did not resort to air sampling. Instead, they placed culture plates on the abdomen of volunteers with use of FAW and failed to identify increased contamination rates with this method.83

Albrecht et al. found that the intake filters used in air blowers were not optimally efficient and resulted in colonization of the internal parts of the device. Overall, 92% of the devices they tested resulted in positive bacterial growth with organisms that are typically implicated in PJI (mostly *Staphylococcus* species).84 However, there is no concrete evidence to link the use of FAW system with SSI/PJI. McGovern et al. studied a change of a warming system from forced air to an alternative system in 1437 patients. A significant increase in deep joint infection, as demonstrated by an elevated infection odds ratio (3.8) (p = 0.024), was identified during a period when FAW was used compared to a period when conductive fabric warming was used. The authors conceded that the study was observational and may have been affected by other infection prevention measures instituted by the hospital.76

**Question 16: Should OR personnel be required to decontaminate their hands with at least an alcohol-based foam every time their hands have been in contact with inanimate objects (including medical equipment) located in the immediate vicinity of the patient?**

**Consensus:** We support current recommendations for hand hygiene in patient care.

**Delegate Vote:** Agree: 86%, Disagree: 8%, Abstain: 6% (Strong Consensus)

**Justification:** Properly performed hand hygiene affords protection to both the patient and healthcare worker from cross transmission of infectious agents. Hand hygiene should be performed by OR personnel involved in examination, manipulation and placement of the patient, in accordance with the World Health Organization’s (WHO) 5 Moments for Hand Hygiene.85 There is ample evidence to confirm that transmission of pathogens from/to a patient to/from their immediate environment, defined below, occurs. However, there is inadequate evidence to show the influence of hand decontamination on this sequence. High-quality clinical investigations are required to study the efficiency of hand decontamination on prevention of SSI and PJI. Frequent hand decontamination has been suggested,86 but concerns have been expressed regarding skin irritation and contact dermatitis.87 Moreover, some risk of change of bacterial flora to colonizing bacteria with skin damage might exist.88

Five sequential steps for cross-transmission of microbial pathogens have been described.86 These steps include shedding of skin flora to inanimate objects surrounding the patients, transfer of the bacteria to the healthcare worker’s hands, adequate survival of the microbes on the healthcare worker’s hands, inadequate hand antisepsis technique by the healthcare worker, and transmission of bacteria from the healthcare worker’s hands to other patients or inanimate objects that can potentially be in contact with patients.

Approximately 106 skin squames containing microorganisms are shed daily from normal skin.89 Therefore, surfaces located in the close vicinity of the patient (such as floor, bed lines, gowns, furniture, and medical equipment such as blood pressure cuffs) can become contaminated with patients’ skin flora.86,90-92 Hands or gloves of healthcare workers can be contaminated after contact with inanimate objects in patient rooms.93,94 Laboratory-based studies have demonstrated that many bacteria, including *Staphylococcus aureus*, gram-negative bacilli, and enterococci, can be transferred to the hands by touching contaminated surfaces.86,94,95 Microorganisms can survive on hands for different lengths of time varying between a few minutes to several hours and healthcare workers’ hands can be progressively colonized due to poor hygiene, longer duration of care, and higher quantity of contamination.86 In one study, the use of an alcohol gel hand wash was associated with a 36% decrease in nosocomial infection rates.96 There is substantial evidence that demonstrates improvement in the rate of healthcare-associated infections with hand hygiene promotional programs that include the use of an alcohol-based hand rub, although studies with improved design methodology are needed.86

**Question 17: What are the guidelines for hand hygiene and glove use for personnel in contact with the patient for examination, manipulation, and placement on the OR table?**

**Consensus:** We support current recommendations in patient care in accordance with the principles of Standard Precautions.

**Delegate Vote:** Agree: 92%, Disagree: 1%, Abstain: 7% (Strong Consensus)

**Justification:** Gloves should be used by OR personnel as dictated by the principles of Standard Precautions.97 Added protection to the healthcare worker, via glove use, is required in the event of potential contact with blood, body fluids, secretions, excretions, mucous membranes, nonintact skin or contaminated equipment.97 Glove use does not preclude the need for application of hand hygiene principles. In the event that the patient is on contact precautions, gloves should be used for all contact with the patient and/or the immediate patient environment. The dynamics of contamination are similar between gloved and ungloved hands.86 Gloves can be contaminated after touching the patient or inanimate objects in patient rooms.92,93,98,99 Risk of cross-contamination through contaminated gloves is similar to that of naked hands.92,99 Therefore, when gloves are used in patient care, hand hygiene must be performed prior to donning gloves and following glove removal. A single pair of gloves may not be used in the care of > one patient.

**Question 18: Should triple gloving be used to prevent contamination during TJA?**

**Consensus:** We recommend double gloving and recognize the theoretical advantage of triple gloving.

**Delegate Vote:** Agree: 89%, Disagree: 7%, Abstain: 4% (Strong Consensus)

**Justification:** A relatively high rate of inner glove contamination has been identified with double-gloving in TJA, leading to the consideration of triple-gloving practices.100,101 Hester et al. compared the rate of inner glove perforation with three different gloving protocols in TJA: latex/cloth, latex/latex, and latex/cloth/latex.102 They found a reduced rate of perforation when the outer glove was a cloth glove compared to a latex glove, and interposing a cloth glove between two latex gloves yielded the lowest rate of perforation. While double-gloving with an outer cloth glove had a notable impact on tactile sensation and was troublesome when manipulating cement, triple-gloving with a cloth glove between two latex gloves was not perceived as having such an important impact. However, reported differences in rates were not shown to be statistically significant. Sebold et al. demonstrated that the use of a cloth glove between two latex gloves was able to reduce inner glove perforation rates to zero in their institution.103 According to their observations, surgeon dexterity was not affected by this gloving practice. In addition, the authors showed that the use of orthopaedic outer gloves yielded lower inner glove puncture rates than regular latex gloves. Sutton et al. showed that a triple-gloving protocol with a cut-resistant liner interposed between the two latex gloves significantly reduced the rate of perforation compared to double-gloving with two latex gloves.104 Overall, triple-gloving seems to decrease inner glove perforation rates; however, this is at the expense of a decrease in surgical dexterity and tactile sensation.

**Question 19: How frequently should gloves be changed during surgery?**

**Consensus:** We recognize the advantage of glove changes at least every 90 minutes or more frequently and the necessity of changing perforated gloves. Permeability appears to be compromised by the exposure to methacrylate cement and gloves should be changed after cementation.

**Delegate Vote:** Agree: 89%, Disagree: 6%, Abstain: 5% (Strong Consensus)

**Justification:** Al-Maiyah et al. conducted an RCT on THA procedures where the study group consisted of changing outer gloves every 20 minutes and before implant cementation, compared to changing only before cementation in the control group.105 This change in practice led to a significant reduction in perforation and contamination rates of outer gloves. Kaya et al. reported that glove perforations occurred after 90 minutes on average and suggested changing gloves every 90 minutes.106 Dawson-Bowling et al. evaluated glove contamination after draping and before opening the final components and found 12% and 24% contamination rates, respectively.107 Beldame et al. identified a significantly higher rate of glove contamination before prosthesis implantation and advised changing gloves before this surgical step.108 The authors also showed that when the outer gloves were contaminated, changing them lead to noncontaminated outer gloves in 80% of cases. Furthermore, in a prospective study, Carter et al. found that a surgeon’s outer glove perforation occurred in 3.7% and 8.3% of primary and revision arthroplasty procedures, respectively. They also found that inner glove perforation was ignored in 19% of double glove perforations and recommended careful inspection of the inner glove whenever outer glove perforation is noted.100

**Question 20: When should instrument trays be opened?**

**Consensus:** We recommend that the timing of opening trays should occur as close to the start of the surgical procedure as possible with the avoidance of any delays between tray opening and the start of surgery.

**Delegate Vote:** Agree: 98%, Disagree: 1%, Abstain: 1% (Strong Consensus)

**Justification:** Dalstrom et al. recently demonstrated a direct correlation between the duration of open exposure of instrument trays and the risk of bacterial contamination.109 Some trays were found to be contaminated immediately after opening. After eliminating those trays, they reported contamination rates of 4% at 30 minutes, 15% at 1 hour, 22% at 2 hours, 26% at 3 hours, and 30% at 4 hours. Brown et al. demonstrated that bacterial air counts during preparation and draping were 4.4 times higher than during surgery, leading them to recommend opening instruments after patient preparation and draping.110

**Question 21: Should trays be covered with sterile drapes/towels when not in use?**

**Consensus:** We recognize a theoretical advantage to covering trays when not in use for extended periods, and that larger covers may be disadvantageous, if they are moved from contaminated areas across the sterile field. We recommend further study of this question regarding timing and techniques.

**Delegate Vote:** Agree: 90%, Disagree: 4%, Abstain: 6% (Strong Consensus)

**Justification:** Chosky et al. demonstrated that covering the instruments with sterile drapes reduced bacterial contamination rates fourfold.111 The Association of Perioperative Registered Nurses guideline for maintaining a sterile surgical field does not recommend covering the sterile table with sheets that fall below the table top because such a practice may cause air currents that can transfer microorganisms from a nonsterile area (below the table level) to the sterile field over the table at the time of drape removal.112 Nevertheless, Dalstrom et al. showed that covering trays significantly reduced the risk of contamination and did not identify any increased risk of contamination when uncovering them.109

**Question 22: After skin incision, should the knife blade be changed for deeper dissections?**

**Consensus:** We recognize high contamination rates in studies of scalpel blades that have been used for the skin incision and recommend changes after skin incision.

**Delegate Vote:** Agree: 88%, Disagree: 8%, Abstain: 4% (Strong Consensus)

**Justification:** In the majority of institutions, separate blades are used for incision of the skin and the deeper tissues during TJA. However, several studies have questioned the necessity of such a practice.113-115 When comparing contamination of skin and deep knives, Ritter et al. were unable to identify any difference in contamination rates in both conventional and LAF conditions.115 Furthermore, organisms retrieved from deep wound cultures did not correlate with those that were on the knife blades, thus refuting deep wound contamination by the blades. Other authors subsequently corroborated these findings.113,114 However, Davis et al. identified a 9.4% contamination rate of superficial blades and supported the routine practice of changing blades after incision.23 Schindler et al. reported a 15.3% contamination rate for skin blades, 74% of which grew coagulase-negative *Staphylococcus* (CNS), one of the most frequent causes of PJI.116 In this study, 10.8% of deep blades were contaminated, 50% of which with CNS. Based on their findings, the authors supported changing the skin blade after incision.

**Question 23: Should electrocautery tips be changed during TJA? If so, how often?**

**Consensus**: In the absence of evidence we recommend further study and no specific behavior.

**Delegate Vote:** Agree: 95%, Disagree: 0%, Abstain: 5% (Strong Consensus)

**Justification**: After review of the literature, there were no studies relevant to the necessity and frequency of change of electrocautery disposable tips during elective TJA.

**Question 24: Should suction tips be regularly changed during surgery? If so, how frequently? Should suction tips enter the femoral canal?**

**Consensus:** We recommend changing suction tips every 60 minutes based on studies showing higher rates of contamination. Suction tips can be introduced into the femoral canal for the time necessary to evacuate fluid but should not be left in the canal, where they circulate large amounts of ambient air and particles that may contaminate the surgery.

**Delegate Vote:** Agree: 85%, Disagree: 8%, Abstain: 7% (Strong Consensus)

**Justification:** Several studies have demonstrated high rates of contamination of suction tips during the intraoperative period.23,117-123 In 1988, Strange-Vognsen et al. identified a 54% contamination rate in orthopaedic procedures.123 Twenty years later, Givissis et al. found the same rate of contamination, with 78% of cases growing *Staphylococcus* species.117 The authors reported one case of deep SSI where the organism was the same as the one isolated from the suction tip. When looking at procedure duration, they showed a 9% contamination rate in procedures lasting < 1 hour compared to a 66.7% in procedures lasting > 1 hour, which led them to advise changing of the catheter tip every hour. Similarly to Strange-Vognsen et al., they recommended turning the suction off when not in use. However, there are concerns that turning off the suction might impose risk of contamination of the surgical field due to backflow of the material along the suction tube and tip.

Greenough et al. found a 37% rate of contamination of operative suctions used in THA.118 However, when evaluating the suction tips used only for cleaning the femoral shaft, only one of those (of 31) was contaminated. The authors advised changing the suction tip before preparing the femur in THA. The same conclusion was drawn by Robinson et al. who conducted a similar study among patients undergoing THA in laminar flow rooms and identified a 41% contamination rate of suction tips.122

**Question 25: Should splash basins be used, as they are known to be a source of contamination?**

**Consensus**: We recommend against the use of fluid filled basins that sit open during the surgery.

**Delegate Vote:** Agree: 88%, Disagree: 3%, Abstain: 9% (Strong Consensus)

**Justification**: Andersson et al. showed that 13 of 21 irrigation solutions stored in basins were contaminated at the end of the procedure in conventional ventilation rooms.15 Baird et al. revealed a contamination rate of 74% in their series among specimens taken from splash basin fluids. In their series, *Staphylococcus epidermidis* was the most prevalent organism.124 Anto et al. demonstrated a 24% rate of contamination of liquid samples removed from the basins.125 Conversely, Glait et al. recently showed much lower rates of contamination of samples taken from basins that were used to wash and store instruments with only one contaminated case of 46 (2.17%).126 However, they used culture swabs as opposed to culturing fluid in other studies.

**Question 26: Do disposable instruments and cutting guides reduce contamination and subsequent PJI?**

**Consensus**: We recognize the possible theoretical advantages of disposable instrumentation but in the absence of data we can make no recommendations.

**Delegate Vote:** Agree: 95%, Disagree: 2%, Abstain: 3% (Strong Consensus)

**Justification**: Mont et al. have recently demonstrated a decreased contamination rate of 57% in nonnavigated and 32% in navigated cases of TKA when using single-use instruments, cutting blocks, and trials.127

Patient-specific instrumentation can shorten the duration of surgery in TKA.128 However, there are no studies that have specifically evaluated the incidence of subsequent PJI in patients that received custom cutting guides or disposable instruments versus those undergoing TJA using conventional instruments and cutting guides. Thus, this issue remains unresolved.

**Question 27: Is there a role for incise draping? What type of incise draping should be used (impregnated or clear)?**

**Consensus:** We recognize the presence of studies that show iodine-impregnated skin incise drapes decreased skin bacterial counts but that no correlation has been established with SSI. We do not make any recommendations regarding the use of skin barriers but do recommend further study.

**Delegate Vote:** Agree: 89%, Disagree: 7%, Abstain: 4% (Strong Consensus)

**Justification**: There is concern about the recolonization of skin and surgical site with the host flora during surgery.129-132 Incise drapes are intended to provide a sterile barrier at the beginning of the surgical procedure. They are used on prepped surgical sites to provide additional protection and minimize the risk of recolonization. While it has been shown that impregnated incise drapes decrease the recolonization rate of skin flora, there have been inconsistent conclusions about the existing evidence regarding the value of drapes in preventing SSI. High-quality evidence with PJI as an end point is lacking. Use of adhesive incise drapes impregnated with iodine should be avoided in patients with systemic or topical allergy to iodine.

The bactericidal action of iodine-containing incise drapes is inferior to conventional skin preparation solutions such as Betadine®. The sole use of incise drapes as a substitute for conventional skin preparation is not recommended.133

In an experimental study on the skin of normal individuals, use of an iodophor-incorporated drape was significantly associated with a lower rate of recolonization of skin bacteria compared with skin site preparation methods, with or without nonimpregnated drape.131 However, another experimental study on an animal model found that after contamination of skin samples with *Staphylococcus aureus* suspension, iodine-containing adhesive drapes were as inefficient as the control group in reducing the number of colony-forming units.134 Another experimental study found that nonimpregnated drapes can facilitate the rate of recolonization of skin after antiseptic preparation.135 In contrast, in an earlier investigation, bacteria did not multiply underneath a plastic adhesive drape and lateral migration of bacteria did not occur.136

In a prospective RCT, Chiu et al. could not demonstrate a difference between the wound contamination rates after surgery of acute hip fractures with and without the use of plastic incise drapes (four of 65 versus one of 55 for with and without drapes, respectively).137

In another prospective RCT in abdominal surgery, within the group of clean and clean-contaminated procedures, iodophor-impregnated incise drapes significantly reduced the contamination of the surgical wound by normal skin flora organisms, but the study was unable to detect any significant difference in the rate of SSI compared with the control group in whom no drape was utilized (5.9% versus 5.6% for procedures performed with and without drapes, respectively).138

In a prospective study comparing 122 patients undergoing hip surgery in which Ioban™ (3M Co, St Paul, MN, USA) was applied to the operative site 24 hours before surgery, bacterial sampling of the wound at the end of the procedure showed that the wound contamination rate was reduced from 15% to 1.6% by this method.139

One review combined the results of clinical trials of a wide range of clean and clean-contaminated surgical procedures (caesarean sections, abdominal, and hip fracture procedures), most of which did not meet criteria for high-quality evidence. In these studies, plastic (defined as polyethylene, polyurethane, or polyvinyl) adhesive drapes (eg, OPSITE™ [Smith & Nephew, Inc, Memphis, TN, USA], Ioban™, and Steri-Drape™ [3M United Kingdom PLC, Bracknell, UK]) were utilized. The authors concluded that adhesive drapes are not associated with a reduced infection rate compared with no adhesive drapes and appear to be associated with an increased risk of infection.140 However, the quality of the few studies included in this systematic review was not high. The authors concluded that if adequately disinfected prior to surgery, the patient’s skin is unlikely to be a primary cause of SSI; therefore, attempts to isolate the skin from the wound using an adhesive drape may be pointless and potentially harmful, as excessive moisture under plastic drapes may encourage bacteria residing in hair follicles to migrate to the surface and multiply.137,140

Another issue that should be considered is that the type of skin preparation affects drape adhesion.141 A few studies demonstrated that addition of DuraPrep™ (3M Co) enhanced the adhesive capacity of drapes.129,130 Choosing a skin preparation that enhances drape adhesion may minimize drape lifting and the potential for wound contamination. It has been concluded that the separation of incise drapes from the skin was associated with a sixfold increase in the infection rate compared with surgical procedures in which the incise drape was not lifted.142 A prospective RCT on patients with TJA confirmed that DuraPrep™ solution was associated with significantly better drape adhesion than povidone-iodine scrub and paint. However, the study was not able to demonstrate a significant difference in skin contamination between the groups, although DuraPrep™ was associated with slightly lower rate of contamination.130

Allergic reactions to povidone-iodine can occur and there is at least one case report of allergic contact dermatitis associated with the use of iodophor-impregnated incise draping.143,144

**Question 28: Does the application of towels or other sterile materials to wound edges and subcutaneous fat during an operation, clipped securely to the edges of the wound, diminish the chances of wound contamination and wound infection?**

**Consensus**: We recognize the traditional practice of covering skin edges with sterile draping but there is wide variation in clinical practice and we make no recommendations.

**Delegate Vote:** Agree: 94%, Disagree: 2%, Abstain: 4% (Strong Consensus)

**Justification**: Evidence regarding the application of sterile material to wound edges is mainly available for abdominal open surgery.145 There is no evidence regarding its use in orthopaedic surgery and we found no recommendation regarding their use for PJI. Towels can serve to support the drapes against instrument strike-through. They may also protect the wound edges from trauma by instruments such as retractors or broaches.

Wound edge protection devices (wound protectors or wound guards) have been used in abdominal surgery to avoid contamination and trauma of the wound edges during laparotomy.145,146 There are two main types of protectors: (1) wound protectors with an external and internal ring connected by an impermeable plastic that covers the wound edges and (2) those with an internal ring connected to a drape that extends outward and over the abdomen and is fixed by adhesive material or clips.146 They provide a physical barrier to protect the incision site from contamination. In contrast, adhesive drapes do not cover the edges of the wound. Wound protectors have only been used in abdominal surgery.145 Two meta-analyses of RCTs compared the use of wound protectors with no protection in abdominal laparotomy. The authors concluded that their use seems to be protective against SSI.145,146 However, the quality of those RCTs has been poor. Two multicenter trials on abdominal laparotomy procedures have been registered and are being conducted at the time of writing.147,148

**Question 29: What type of draping should be used (reusable or disposable)?**

**Consensus**: We recognize that penetration of drapes by liquids is believed to be equivalent to contamination and recommend impervious drapes. In the absence of data on disposable versus cloth drapes, we make no recommendation except for further study.

**Delegate Vote:** Agree: 90%, Disagree: 6%, Abstain: 4% (Strong Consensus)

**Justification**: The available evidence is solely experimental. Most of the studies have been performed in models with rigorous conditions that are unusual in real-life situations. Clinical trials with PJI as an end point are lacking.

In addition to the physical properties of material applied for fabricating drapes, factors such as pressure, friction, contact time with contaminated material, state of moisture/dryness, and the moisturizing agent (blood, normal saline, or antiseptic solutions) can affect the bacterial permeability of drapes.149,150 While passage of bacteria through dry drapes does happen, the strike-through rate of bacteria is enhanced when wetted by normal saline or blood and diminished when wetted by antiseptic solutions (iodine or chlorhexidine).149 Moreover, drape material may demonstrate different levels of impermeability depending on the penetrating particle (aqueous fluids, albumin, or bacteria).151-153 Woven and nonwoven materials vary in their ability to resist bacterial strikethrough. Disposable nonwoven drapes are superior to reusable woven cotton/linen drapes in resisting bacterial penetration. When wetted by normal saline, reusable woven drapes were penetrated by bacteria within 30 minutes, while the majority of disposable nonwoven drapes were not.151 Being impervious does not necessarily mean being absolutely impenetrable to bacteria and impermeability can vary between different disposable drape brands. However, disposable drapes considerably decrease bacterial load passing through them.154

Two RCTs were conducted comparing reusable and disposable drapes and gowns in coronary artery bypass graft and elective abdominal surgery, with SSI as their main outcome. None of these studies found differences between the two types of gowns and drapes.155,156

**Question 30: Is there evidence that the use of sticky U drapes, applied before and after prepping, effectively seals the nonprepped area from the operative field?**

**Consensus**: We recognize that adhesive U-drapes to isolate the perineum has been traditional practice but in the absence of data we make no recommendations.

**Delegate Vote:** Agree: 83%, Disagree: 11%, Abstain: 6% (Strong Consensus)

**Justification**: There are no published or unpublished reports that we could identify that were related to this issue.

**Question 31: Is irrigation useful? How should the delivery method for irrigation fluid be (high pulse, low pulse, or bulb)?**

**Consensus:** We recognize the theoretical basis for irrigation to dilute contamination and nonviable tissue and that a greater volume of irrigation would be expected to achieve greater dilution. We recognize advantages and disadvantages of different methods of delivering fluid but make no recommendations of one method over another.

**Delegate Vote:** Agree: 91%, Disagree: 4%, Abstain: 5% (Strong Consensus)

**Justification:** There are indirect data regarding the optimal volume of irrigation in TJA. In both animal and human studies, increasing the volume of irrigation solution removes more particulate matter and bacteria, but the effect plateaus depending on the system. There have been no reported human clinical studies related to the volume of irrigation.157,158 High-quality studies with PJI as end point are lacking. No evidence was found regarding differences in irrigation in primary and revision TJA. Use of high-pressure pulsatile lavage may have potential benefits of being time-saving and removing necrotic tissue and debris more effectively.159-164 It also improves the mechanical stability of cemented arthroplasty by allowing better cement penetration in cancellous bone tissue. However, there are some concerns regarding damage to tissue structures and propagation of bacteria into the deeper layers of soft tissues with the use of high-pressure lavage. High-pressure pulsatile lavage should perhaps be reserved for severely contaminated wounds or for open injuries for which treatment will be delayed. Low-pressure irrigation might be useful if contamination is minimal or treatment is immediate. High-quality evidence is lacking regarding optimum lavage pressure in primary or revision TJA.

Decreases in the amount of bacteria present in the surgical site have been observed with normal saline lavage,165 indicating that a component of physical removal for every irrigating solution should be considered. For a clean contaminated surgery (appendectomy) irrigation with normal saline was found to decrease SSI in comparison with no irrigation.166,167 In one study that used pulsatile lavage with normal saline after cemented TKA, particles > 1 µm were collected consecutively after each liter of lavage up to 8 L. The weight of these particles peaked in the first 1-L lavage fluid and gradually decreased until the eighth lavage fluid. Significant differences were found between the first and second, second and third, and third and fourth lavage. However, no significant differences were found beyond the fourth lavage. The results of this study indicated that 4 L of pulse lavage is effective for removing the bone and cement particles during cemented TKA. The authors suggested that if bacteria are considered as particles > 1 µm, 4 L of pulse lavage may be effective for removal of bacterial particles.158

The precise definition of high- and low-pressure lavage is not established in the literature. Generally, < 15 psi (103.4 kPa) and > 35 psi (241.3 kPa) are considered low or high pressure, respectively.168 High-pulsatile lavage has been shown to improve cement penetration in cancellous bone and increase mechanical strength at the cement-bone interface during in vitro studies.169-174 In vivo studies have also demonstrated fewer radiolucency zones in follow-up radiographic evaluation.175 In addition, a relationship between the pressure of irrigation and the quantity of cellular material removed from the bony trabeculae has been demonstrated.176 However, there is no agreement on a cutoff point for high-pressure lavage. Some studies suggest that even lavage pressures that were considered to be too low to have macroscopic influence may still have an effect on bone marrow mesenchymal cells and direct them to differentiate into adipocyte tissues, thus declining the content of osteoblasts in marrow.159

High-pressure lavage may result in tissue damage in cancellous bone, cortical bone, and muscle; and can negatively influence the healing process and early formation of new bone.91, 176-178 Pulsatile lavage (either high or low pressure) results in greater deep bacterial seeding in bone than does brush and bulb-syringe lavage in in vitro models162,179 and can spread the contamination to nearby tissues.179 High-pressure pulsatile lavage results in deeper bacterial penetration in muscle tissue in comparison with low-pressure pulsatile lavage.168

There is a considerable body of evidence regarding open fractures and contaminated wounds. A few early and recent studies, including in vitro and in vivo human and animal studies, demonstrated that high-pressure pulsatile lavage is more effective than low-pressure pulsatile lavage for removing particulate matter, bacteria, and necrotic tissue, particularly in contaminated wounds that had delayed treatment.159-164 Moreover, in an experimental model it was demonstrated that low-pressure pulsatile lavage was more effective and efficient than bulb-syringe irrigation in reducing bacterial removal.180

One prospective RCT showed that pulsatile lavage in comparison with normal lavage by syringe or jug leads to a lower incidence of PJI after cemented hemiarthroplasty for hip fracture (three of 164 versus 10 of 192 for pulsatile and syringe lavage groups, respectively).181

In another study, the use of high-pressure pulsatile lavage during open debridement for the treatment of acute orthopaedic implant infections (mainly TKA, THA, and hip hemiarthroplasty) was associated with a similar success rate compared with the conventional manual low-pressure lavage (n = 79).182

**Question 32: What type of irrigation solution should be used? Should antibiotics be added to the irrigation solution?**

**Consensus:** We recognize the mechanical advantage of irrigation as per Question 31 but that conflicting evidence exists supporting the use of one agent over the other and make no recommendation regarding type of solution.

**Delegate Vote:** Agree: 90%, Disagree: 7%, Abstain: 3% (Strong Consensus)

**Justification:** Detergents such as castile soap or benzalkonium chloride are effective in decreasing the burden of bacteria in musculoskeletal wounds because of their surface-active properties. The detergents act by disrupting hydrophobic and electrostatic forces, thereby inhibiting the ability of bacteria to bind to soft tissue and bone. It is possible that some detergents act on some bacteria more efficiently than on others.157,183

Weak evidence is available for the benefit of irrigation with diluted Betadine® solution before closure of surgical wound. However, no deleterious influence on wound healing or any other major adverse effects have been associated with their use. Concerns for its potential chondrocytotoxicity are supported by experimental evidence only. Lower concentrations (0.35%-0.5%) with a short time of lavage might avoid potential chondrocytotoxic effects in partial knee arthroplasty. Further clinical evidence is required to define optimal concentration and length of exposure.

The pharmacodynamic profiles of antibiotics vary depending on the type, dose, and method of delivery.184 A variation of these factors, a difference in surgical settings in which studies have been performed, and a lack of specific efficacy criteria make it difficult to reach a conclusion regarding whether topical antibiotics are efficacious; and if so, what type should be used and which formulations are optimal for prophylaxis of SSI and PJI. Moreover, the safety of using topical antibiotics has been questioned. Evidence regarding wound irrigation with antibiotic solutions mainly comes from nonorthopaedic surgical specialties with clean-contaminated surgeries. Most of these RCTs found that adding antibiotics to irrigation solutions did not decrease the incidence of SSI significantly in comparison with irrigation with normal saline solution.160,185-189 This finding has also been supported by some experimental studies.157,190 Further high-level evidence with SSI or PJI as end points is required to evaluate the efficacy and potential adverse effects of local irrigation with antibiotic solutions on the surgical site.

In vitro studies show that Castile soap is more effective than antibiotic solutions at removing *Staphylococcus aureus, Staphylococcus epidermidis, and Pseudomonas aeruginosa* from metallic implants and bone.191,192 In an RCT on open fractures, soap and bacitracin solution did not result in any difference in the incidence of SSI, although bacitracin was associated with more wound complications.193

In one RCT in general surgery, there were more wound infections in the saline group (39 of 258) in comparison with the povidone-iodine solution group (seven of 242).194 Irrigation with dilute povidone-iodine solution (0.35%) before closure of the surgical wound in THA and TKA was associated with significant decrease in PJI.195 The same solution was associated with a significant decrease in deep SSI in spine surgery (six of 206 deep SSIs in the no Betadine® group versus zero of 208 in the Betadine® group).196 Ten of 15 studies (11 RCTs and four prospective comparative studies) in a systematic review of different surgical specialties (two studies of spine surgery) demonstrated that povidone-iodine irrigation was significantly more effective at preventing SSI than the comparative interventions of saline, water, or no irrigation.197 The other 5 studies did not detect any significant difference. This study has considerable methodological limitations, such as considerable variety in the types of surgeries, quality of clean or contaminated interventions, inconsistent concentration of povidone-iodine, and variable use of prophylactic antibiotics. There is no reported complication with the use of dilute Betadine® irrigation and no adverse effect on wound healing, bone union, or clinical outcome has been reported.196 One study demonstrated an increased postoperative serum iodine which was not related to any adverse effects.197 The cytotoxicity of povidone-iodine solution is controversial: Chondrocyte ability for DNA synthesis significantly decreased after 5 minutes of exposure to povidone-iodine 1%. Other studies similarly show toxic effects of povidone-iodine solution on fibroblasts, keratinocytes, synovial cells and chondrocytes.198,199 Cytotoxicity has been related in bovine chondrocytes with length of exposure, regardless of concentration, although higher concentrations were associated with less viability of chondrocytes. A concentration of 0.35% povidone-iodine was the least chondrotoxic but still reduced the cell viability when applied for > 1 minute. Cytotoxicity has been observed in cultured embryonic chicken tibia osteoblasts at a Betadine® concentration of 5%. Less cytotoxic effect occurs at a povidone-iodine concentration of 0.5%.200 Povidone-iodine preparations of 1%, 5%, or 10% do not have a deleterious effect on wound healing in animals and humans.201 Povidone-iodine irrigation should not be used in patients with iodine sensitivity, burns, and thyroid or renal disease.197 The sterility of povidone-iodine solution before its use should be meticulously monitored because its contamination has been associated with infectious complications.202,203 One experimental study showed that there was no difference in the quality of cement fixation when irrigation was done with povidone-iodine or normal saline, although both solutions were inferior to hydrogen peroxide solution.204

Topical antibiotics should have a broad spectrum and low systemic absorption and be relatively inexpensive and harmless to the tissue. The most commonly used topical antibiotics include cephalosporins, aminoglycosides (neomycin), glycopeptides, chloramphenicol, polymyxin, and bacitracin.184,205 The potential advantages of topical antibiotic use are their limited potential for systemic absorption and toxicity, low potential for development of antibiotic resistance, and the fact that their effect is essentially independent from the local physiological changes that may affect the efficacy of systemic antibiotics.206 However, topical antibiotics may produce contact dermatitis or hypersensitivity and their use has been reported to be associated with serious systemic effects such as anaphylaxis with bacitracin and deafness and renal failure with a neomycin-bacitracin-polymyxin combination.207-209 Earlier studies demonstrated that prophylactic topical administration of antibiotics in the surgical incision during various orthopaedic and nonorthopaedic procedures is more efficacious than normal saline. However, consistent results have not been reported regarding their efficacy.165 In vitroand animal studies using bone or metal surfaces failed to show better performance for neomycin and bacitracin solutions in comparison with normal saline for removing bacteria from bone, titanium, and stainless steel.190-192 Despite evidence that topical antibiotics decrease bacterial inoculum in clean surgical wounds,210 it has not been shown that they offer any advantage over intravenous antibiotic prophylaxis, nor that they have been proven to decrease the incidence of SSI.184,186 A study of a canine model for TJA reported a reduction in the SSI rate with neomycin containing irrigation solution.211 There is concern regarding the adverse effect of topical antibiotic solutions on wound and bone healing. An RCT on open fractures found that topical irrigation with bacitracin solution did not decrease the incidence of SSI in comparison with soap, yet it was associated with a higher rate of wound complications.193

**Question 33: Is there a role for intraoperative application of autologous blood-derived products to the wound in preventing infection?**

**Consensus**: In the absence of data we make no recommendation regarding autologous blood derived products to the wound to prevent infection.

**Delegate Vote:** Agree: 94%, Disagree: 2%, Abstain: 4% (Strong Consensus)

**Justification**: Although some benefits have been observed regarding the intraoperative application of autologous blood-derived products in TJA, the majority of the studies were not sufficiently powered to be able to detect difference for PJI. Only one RCT demonstrated that use of these products directly decreased the incidence of postoperative wound infection.212 Larger-scale trials with PJI as an end point are required.

In TKA, application of autologous platelet gel and fibrin sealant together on the wound tissues at the end of surgery was associated with a higher postoperative hemoglobin level and decreased the need for blood transfusion. The incidences of wound leakage, wound healing disturbance, and wound infection (zero of 85 versus four of 80) were significantly less in patients managed with platelet gel and fibrin sealant.212

In a multicenter study (n = 58) topical spraying of fibrin tissue adhesive (nonautologous cryoprecipitate-based fibrinogen) was added to standard hemostatic measures in TKA and resulted in a decrease in blood loss and reduced blood transfusion requirements. There were 3 cases of superficial wound infection (two of 29 and one of 29 for the treatment and control groups, respectively) without any significant difference.213 Other similar RCTs on TKA (n = 53)214 and THA (n = 81)215 reported similar findings regarding blood loss.

In one RCT using autologous fibrin sealant in THA, there was an association with less wound drainage and blood loss (no significant difference), yet the transfusion rate and hospital stay remained similar to the control group.216

One review included six trials213-218 that studied the use of fibrin sealants in orthopaedic surgery. In these trials 482 patients were included, of whom 235 were randomized to receive fibrin sealants. The review found use of fibrin sealant in the context of orthopaedic surgery that was associated with a reduced postoperative blood loss on average around 223 mL per patient, and reduced the risk of exposure to allogeneic red blood cell transfusion by 32%. Fibrin sealant treatment was not associated with an increased risk of wound infection, any infection, hematoma formation, or death. Hospital length of stay was not reduced in patients treated with fibrin sealant.219

**Question 34: Do staples or the type of suture have an effect on infectious events? If so, what is the best closure method to prevent infectious events?**

**Consensus**: In the absence of conclusive data and the wide variability in surgical practice, we make no recommendation regarding specific sutures or staples to prevent infection.

**Delegate Vote:** Agree: 92%, Disagree: 3%, Abstain: 5% (Strong Consensus)

**Justification**: We are unable to draw a clear conclusion about the best method for closure to prevent infectious complications due to inadequate definitions for infection complications of surgical wounds. In addition, the majority of the studies reviewed were underpowered. Evidence is lacking regarding patients whose health may interfere with wound healing and in surgical sites of high tension. Tissue adhesives should be considered as a biological sealant rather than a closure method of mechanical strength.

In an RCT that included 90 patients who underwent TKA, no significant differences in infection, dehiscence, general health, and functional and clinical assessments were observed. The study compared the following: (1) combined suture tissue adhesives defined by sutures for capsule and subcutaneous layers and tissue adhesive (2-octyl or n-butyl-2) for the final cutaneous layer, (2) staples, and (3) conventional subcuticular suture approach (sutures used for the capsule, subcutaneous, and cutaneous layers). It was observed that the length of hospital stay was higher with the staple group.220

Another trial included 187 patients who underwent TKA (n = 85) and THA (n = 102) and compared wound closure with 2-octylcyanoacrylate (OCA), staples, and sutures.221 Early wound discharge (< 24 hours postoperatively) was reduced with OCA in both THA and TKA. In TKA, prolonged wound discharge was observed with OCA. No significant difference was observed in the incidence of superficial wound infections between groups. No deep infection was detected. Sealing of the wound as measured by blood strike-through onto the dressing was significantly improved with OCA in both joints. The authors concluded that for more mobile surgical wounds (such as with TKA), OCA might not be appropriate for skin closure because it does not provide adequate resistance for withstanding early rehabilitation.

In another trial including 90 patients with THA, skin adhesive and surgical staples were both effective skin closure methods. Staples were quicker and easier to use than skin adhesive and less expensive. No significant difference was found regarding the occurrence of complications, although the study was not adequately powered to detect any case of deep infection.222

A review of RCTs in a wide range of nonorthopaedic surgical specialties with pediatric and adult patients223 concluded that sutures were significantly better than tissue adhesives for minimizing dehiscence. Sutures were also found to be significantly faster to use. No differences were found between tissue adhesives and tapes for minimizing dehiscence or infection. Tapes and staples were significantly faster to use than tissue adhesives. For all outcomes of dehiscence and infection there were no statistically significant differences between high- and low-viscosity adhesives.

Smith et al. performed a meta-analysis to compare the clinical outcomes of the use of staples and sutures in orthopaedic surgery.224 The authors included six small-sized studies and noted major methodological drawbacks including inadequate definitions for superficial and deep infections in most of them. Based on these studies, they found a significantly higher risk of developing wound infection when the wound was closed with staples rather than sutures (17 of 350 versus three of 333 superficial or deep infections for staples and sutures, respectively). Five of the six studies included data on patients who underwent hip surgery. A higher risk of infection with staples also existed in patients who underwent hip surgery. At this point, there is need for future studies to evaluate this issue further.

**Question 35: Does the use of a surgical safety checklist and time-out affect the rate of SSI in arthroplasty patients?**

**Consensus**: We support the surgical checklist protocol as beneficial to patient safety, and specifically as it applies to correct administration of prophylactic antibiotics.

**Delegate Vote:** Agree: 97%, Disagree: 1%, Abstain: 2% (Strong Consensus)

**Justification:** Checklists seem to improve interprofessional communication in the OR. High-quality evidence exists supporting the beneficial effect of surgical safety checklists and time-outs for reduction of SSI and other major postoperative complications by assuring timely administration of preoperative antibiotic prophylaxis. However, evidence shows that many elements of adapted checklists are not adequately performed. There is no evidence regarding the influence of implementing a mandatory surgical checklist on appropriate application of evidence-based measures for SSI in TJA. Existing evidence shows the beneficial effect of mandatory safety checklists on infectious complications for other simpler procedures.

One study showed that implementation of an interprofessional preoperative checklist in the OR was associated with a decline in communication failures (mean number of communication failures per procedure decreased from 3.95 to 1.31; the number of communication failures associated with visible negative consequences decreased by 64%).225

A relationship appears to exist between the adoption of a routine preoperative checklist by the surgical team and improvement in the timing of antibiotic prophylaxis.226-228 In a prospective study of eight diverse hospitals around the world (including high- and low-income locations), substantial decreases in major surgical complications and mortality during the early postoperative period was observed after implementation of a World Health Organization checklist in the OR. The adherence rate to appropriate preoperative antibiotic administration increased from 5% to 83% and the incidence of SSI significantly decreased from 6.2% to 3.4% (p < 0.001). The improvement in quality of care was observed even with incomplete compliance of the checklist.229 In another study performed in hospitals with a high standard of care in the Netherlands, performing the surgical patient safety system checklist, which includes pre-, intra-, and postoperative elements, also reduced the incidence of SSI (from 3.8% to 2.7%; p = 0.006) as well as other major postoperative complications. Compliance was associated with greater improvements in quality of care.226

In a prospective study, it was observed that many evidence-based measures for SSI reduction (prophylactic antibiotic timing, maintaining normothermia during surgery, appropriate urinary tract catheterization, and hand hygiene) were not applied adequately for arthroplasty procedures and the situation was even worse for fracture surgeries.230 There is no evidence regarding the influence of a mandatory checklist on appropriate application of its components. However, there are prospective studies demonstrating that implementing mandatory checklists resulted in decrease in the incidence of central line associated bloodstream infections in intensive care unit patients.231,232

**References:**

1. Lidwell OM, Lowbury EJ, Whyte W, Blowers R, Stanley SJ, Lowe D. Airborne contamination of wounds in joint replacement operations: the relationship to sepsis rates. J Hosp Infect. 1983;4(2):111-131.

2. McPherson EJ, Peters CL (eds). Musculoskeletal Infection. In: Orthopedic Knowledge Update 10. Rosemont, IL: American Academy of Orthopaedic Surgeons; 2011:239-258.

3. Whyte W, Hodgson R, Tinkler J. The importance of airborne bacterial contamination of wounds. J Hosp Infect. 1982;3(2):123-135.

4. Edmiston CE Jr, Seabrook GR, Cambria RA, et al. Molecular epidemiology of microbial contamination in the operating room environment: Is there a risk for infection? Surgery. 2005;138(4):573-579; discussion 579-582.

5. Taylor GJ, Bannister GC, Leeming JP. Wound disinfection with ultraviolet radiation. J Hosp Infect. 1995;30(2):85-93.

6. Seal DV, Clark RP. Electronic particle counting for evaluating the quality of air in operating theatres: a potential basis for standards? J Appl Bacteriol. 1990;68(3):225-230.

7. Stocks GW, Self SD, Thompson B, Adame XA, O'Connor DP. Predicting bacterial populations based on airborne particulates: a study performed in nonlaminar flow operating rooms during joint arthroplasty surgery. Am J Infect Control. 2010;38(3):199-204.

8. Friberg B, Friberg S, Burman LG. Correlation between surface and air counts of particles carrying aerobic bacteria in operating rooms with turbulent ventilation: an experimental study. J Hosp Infect. 1999;42(1):61-68.

9. Charnley J. Postoperative infection after total hip replacement with special reference to air contamination in the operating room. Clin Orthop Relat Res. 1972;(87):167-187.

10. Lidwell OM, Lowbury EJ, Whyte W, Blowers R, Stanley SJ, Lowe D. Effect of ultraclean air in operating rooms on deep sepsis in the joint after total hip or knee replacement: a randomised study. Br Med J (Clin Res Ed). 1982;285(6334):10-14.

11. Breier AC, Brandt C, Sohr D, Geffers C, Gastmeier P. Laminar airflow ceiling size: no impact on infection rates following hip and knee prosthesis. Infect Control Hosp Epidemiol. 2011;32(11):1097-1102.

12. Gastmeier P, Breier AC, Brandt C. Influence of laminar airflow on prosthetic joint infections: a systematic review. J Hosp Infect. 2012;81(2):73-78.

13. Hooper GJ, Rothwell AG, Frampton C, Wyatt MC. Does the use of laminar flow and space suits reduce early deep infection after total hip and knee replacement?: the ten-year results of the New Zealand Joint Registry. J Bone Joint Surg Br. 2011;93(1):85-90.

14. Miner AL, Losina E, Katz JN, Fossel AH, Platt R. Deep infection after total knee replacement: impact of laminar airflow systems and body exhaust suits in the modern operating room. Infect Control Hosp Epidemiol. 2007;28(2):222-226.

15. Andersson BM, Lidgren L, Schalen C, Steen A. Contamination of irrigation solutions in an operating theatre. Infect Control. 1984;5(7):339-341.

16. Brandt C, Hott U, Sohr D, Daschner F, Gastmeier P, Ruden H. Operating room ventilation with laminar airflow shows no protective effect on the surgical site infection rate in orthopedic and abdominal surgery. Ann Surg. 2008;248(5):695-700.

17. Ritter MA, Eitzen H, French ML, Hart JB. The operating room environment as affected by people and the surgical face mask. Clin Orthop Relat Res. 1975;(111):147-150.

18. Salvati EA, Robinson RP, Zeno SM, Koslin BL, Brause BD, Wilson PD Jr. Infection rates after 3175 total hip and total knee replacements performed with and without a horizontal unidirectional filtered air-flow system. J Bone Joint Surg Am. 1982;64(4):525-535.

19. Taylor GJ, Bannister GC. Infection and interposition between ultraclean air source and wound. J Bone Joint Surg Br. 1993;75(3):503-504.

20. Quraishi ZA, Blais FX, Sottile WS, Adler LM. Movement of personnel and wound contamination. AORN J. 1983;38(1):146-147, 150-146.

21. Panahi P, Stroh M, Casper DS, Parvizi J, Austin MS. Operating room traffic is a major concern during total joint arthroplasty. Clin Orthop Relat Res. 2012;470(10):2690-2694.

22. Lynch RJ, Englesbe MJ, Sturm L, et al. Measurement of foot traffic in the operating room: implications for infection control. Am J Med Qual. 2009;24(1):45-52.

23. Davis N, Curry A, Gambhir AK, et al. Intraoperative bacterial contamination in operations for joint replacement. J Bone Joint Surg Br. 1999;81(5):886-889.

24. Hussein JR, Villar RN, Gray AJ, Farrington M. Use of light handles in the laminar flow operating theatre--is it a cause of bacterial concern? Ann R Coll Surg Engl. 2001;83(5):353-354.

25. Berg M, Bergman BR, Hoborn J. Ultraviolet radiation compared to an ultra-clean air enclosure. Comparison of air bacteria counts in operating rooms. J Bone Joint Surg Br. 1991;73(5):811-815.

26. Carlsson AS, Nilsson B, Walder MH, Osterberg K. Ultraviolet radiation and air contamination during total hip replacement. J Hosp Infect. 1986;7(2):176-184.

27. Lowell JD, Kundsin RB, Schwartz CM, Pozin D. Ultraviolet radiation and reduction of deep wound infection following hip and knee arthroplasty. Ann N Y Acad Sci. 1980;353:285-293.

28. Mangram AJ, Horan TC, Pearson ML, Silver LC, Jarvis WR. Guideline for Prevention of Surgical Site Infection, 1999. Centers for Disease Control and Prevention (CDC) Hospital Infection Control Practices Advisory Committee. Am J Infect Control. 1999;27(2):97-132; quiz 133-134; discussion 196.

29. Moggio M, Goldner JL, McCollum DE, Beissinger SF. Wound infections in patients undergoing total hip arthroplasty. Ultraviolet light for the control of airborne bacteria. Arch Surg. 1979;114(7):815-823.

30. Ritter MA, Olberding EM, Malinzak RA. Ultraviolet lighting during orthopaedic surgery and the rate of infection. J Bone Joint Surg Am. 2007;89(9):1935-1940.

31. Belkin NL. The surgical mask has its first performance standard--a century after it was introduced. Bull Am Coll Surg. 2009;94(12):22-25.

32. Lipp A, Edwards P. Disposable surgical face masks: a systematic review. Can Oper Room Nurs J. 2005;23(3):20-21, 24-25, 33-28.

33. Romney MG. Surgical face masks in the operating theatre: re-examining the evidence. J Hosp Infect. 2001;47(4):251-256.

34. Sellden E. Is routine use of a face mask necessary in the operating room? Anesthesiology. 2010;113(6):1447.

35. Webster J, Croger S, Lister C, Doidge M, Terry MJ, Jones I. Use of face masks by non-scrubbed operating room staff: a randomized controlled trial. ANZ J Surg. 2010;80(3):169-173.

36. Berger SA, Kramer M, Nagar H, Finkelstein A, Frimmerman A, Miller HI. Effect of surgical mask position on bacterial contamination of the operative field. J Hosp Infect. 1993;23(1):51-54.

37. Chamberlain GV, Houang E. Trial of the use of masks in the gynaecological operating theatre. Ann R Coll Surg Engl. 1984;66(6):432-433.

38. Laslett LJ, Sabin A. Wearing of caps and masks not necessary during cardiac catheterization. Cathet Cardiovasc Diagn. 1989;17(3):158-160.

39. Mitchell NJ, Hunt S. Surgical face masks in modern operating rooms--a costly and unnecessary ritual? J Hosp Infect. 1991;18(3):239-242.

40. Orr NW, Bailey S. Masks in surgery. J Hosp Infect. 1992;20(1):57.

41. Tunevall TG. Postoperative wound infections and surgical face masks: a controlled study. World J Surg. 1991;15(3):383-387; discussion 387-388.

42. Tunevall TG, Jorbeck H. Influence of wearing masks on the density of airborne bacteria in the vicinity of the surgical wound. Eur J Surg. 1992;158(5):263-266.

43. Brady RR, Chitnis S, Stewart RW, Graham C, Yalamarthi S, Morris K. NHS connecting for health: healthcare professionals, mobile technology, and infection control. Telemed J E Health. 2012;18(4):289-291.

44. Jeske HC, Tiefenthaler W, Hohlrieder M, Hinterberger G, Benzer A. Bacterial contamination of anaesthetists' hands by personal mobile phone and fixed phone use in the operating theatre. Anaesthesia. 2007;62(9):904-906.

45. Lee YJ, Yoo CG, Lee CT, et al. Contamination rates between smart cell phones and non-smart cell phones of healthcare workers. J Hosp Med. 2013;8(3):144-147.

46. Sadat-Ali M, Al-Omran AK, Azam Q, et al. Bacterial flora on cell phones of health care providers in a teaching institution. Am J Infect Control. 2010;38(5):404-405.

47. Singh A, Purohit B. Mobile phones in hospital settings: a serious threat to infection. Occup Health Saf. 2012;81(3):42-44.

48. Ulger F, Esen S, Dilek A, Yanik K, Gunaydin M, Leblebicioglu H. Are we aware how contaminated our mobile phones with nosocomial pathogens? Ann Clin Microbiol Antimicrob. 2009;8:7.

49. Ustun C, Cihangiroglu M. Health care workers' mobile phones: a potential cause of microbial cross-contamination between hospitals and community. J Occup Environ Hyg. 2012;9(9):538-542.

50. Singh D, Kaur H, Gardner WG, Treen LB. Bacterial contamination of hospital pagers. Infect Control Hosp Epidemiol. 2002;23(5):274-276.

51. Hassoun A, Vellozzi EM, Smith MA. Colonization of personal digital assistants carried by healthcare professionals. Infect Control Hosp Epidemiol. 2004;25(11):1000-1001.

52. Carroll K, Dowsey M, Choong P, Peel T. Risk factors for superficial wound complications in hip and knee arthroplasty. Clin Microbiol Infect. 2013 March 7 [Epub ahead of print].

53. Cordero-Ampuero J, de Dios M. What are the risk factors for infection in hemiarthroplasties and total hip arthroplasties? Clin Orthop Relat Res. 2010;468(12):3268-3277.

54. Huotari K, Agthe N, Lyytikainen O. Validation of surgical site infection surveillance in orthopedic procedures. Am J Infect Control. 2007;35(4):216-221.

55. Masgala A, Chronopoulos E, Nikolopoulos G, et al. Risk factors affecting the incidence of infection after orthopaedic surgery: the role of chemoprophylaxis. Cent Eur J Public Health. 2012;20(4):252-256.

56. Namba RS, Inacio MC, Paxton EW. Risk factors associated with deep surgical site infections after primary total knee arthroplasty: an analysis of 56,216 knees. J Bone Joint Surg Am. 2013;95(9):775-782.

57. Pedersen AB, Svendsson JE, Johnsen SP, Riis A, Overgaard S. Risk factors for revision due to infection after primary total hip arthroplasty. A population-based study of 80,756 primary procedures in the Danish Hip Arthroplasty Registry. Acta Orthop. 2010;81(5):542-547.

58. Peersman G, Laskin R, Davis J, Peterson MG, Richart T. Prolonged operative time correlates with increased infection rate after total knee arthroplasty. HSS J. 2006;2(1):70-72.

59. Pulido L, Ghanem E, Joshi A, Purtill JJ, Parvizi J. Periprosthetic joint infection: the incidence, timing, and predisposing factors. Clin Orthop Relat Res. 2008;466(7):1710-1715.

60. Ridgeway S, Wilson J, Charlet A, Kafatos G, Pearson A, Coello R. Infection of the surgical site after arthroplasty of the hip. J Bone Joint Surg Br. 2005;87(6):844-850.

61. Skramm I, Saltyte Benth J, Bukholm G. Decreasing time trend in SSI incidence for orthopaedic procedures: surveillance matters! J Hosp Infect. 2012;82(4):243-247.

62. Smabrekke A, Espehaug B, Havelin LI, Furnes O. Operating time and survival of primary total hip replacements: an analysis of 31,745 primary cemented and uncemented total hip replacements from local hospitals reported to the Norwegian Arthroplasty Register 1987-2001. Acta Orthop Scand. 2004;75(5):524-532.

63. Urquhart DM, Hanna FS, Brennan SL, et al. Incidence and risk factors for deep surgical site infection after primary total hip arthroplasty: a systematic review. J Arthroplasty. 2010;25(8):1216-1222 e1211-1213.

64. van Kasteren ME, Mannien J, Ott A, Kullberg BJ, de Boer AS, Gyssens IC. Antibiotic prophylaxis and the risk of surgical site infections following total hip arthroplasty: timely administration is the most important factor. Clin Infect Dis. 2007;44(7):921-927.

65. Willis-Owen CA, Konyves A, Martin DK. Factors affecting the incidence of infection in hip and knee replacement: an analysis of 5277 cases. J Bone Joint Surg Br. 2010;92(8):1128-1133.

66. Culver DH, Horan TC, Gaynes RP, et al. Surgical wound infection rates by wound class, operative procedure, and patient risk index. National Nosocomial Infections Surveillance System. Am J Med. 1991;91(3B):152S-157S.

67. Wymenga AB, van Horn JR, Theeuwes A, Muytjens HL, Slooff TJ. Perioperative factors associated with septic arthritis after arthroplasty. Prospective multicenter study of 362 knee and 2,651 hip operations. Acta Orthop Scand. 1992;63(6):665-671.

68. de Boer AS, Geubbels EL, Wille J, Mintjes-de Groot AJ. Risk assessment for surgical site infections following total hip and total knee prostheses. J Chemother. 2001;13 Spec No 1(1):42-47.

69. Jaffer AK, Barsoum WK, Krebs V, Hurbanek JG, Morra N, Brotman DJ. Duration of anesthesia and venous thromboembolism after hip and knee arthroplasty. Mayo Clin Proc. 2005;80(6):732-738.

70. Strum DP, Sampson AR, May JH, Vargas LG. Surgeon and type of anesthesia predict variability in surgical procedure times. Anesthesiology. 2000;92(5):1454-1466.

71. Kramer A, Schwebke I, Kampf G. How long do nosocomial pathogens persist on inanimate surfaces? A systematic review. BMC Infect Dis. 2006;6:130.

72. Abolghasemian M, Sternheim A, Shakib A, Safir OA, Backstein D. Is arthroplasty immediately after an infected case a risk factor for infection? Clin Orthop Relat Res. 2013;471(7):2253-2258.

73. Namdari S, Voleti PB, Baldwin KD, Lee GC. Primary total joint arthroplasty performed in operating rooms following cases of known infection. Orthopedics. 2011;34(9):e541-545.

74. Kurz A, Sessler DI, Lenhardt R. Perioperative normothermia to reduce the incidence of surgical-wound infection and shorten hospitalization. Study of Wound Infection and Temperature Group. N Engl J Med. 1996;334(19):1209-1215.

75. Melling AC, Ali B, Scott EM, Leaper DJ. Effects of preoperative warming on the incidence of wound infection after clean surgery: a randomised controlled trial. Lancet. Sep 15 2001;358(9285):876-880.

76. McGovern PD, Albrecht M, Belani KG, et al. Forced-air warming and ultra-clean ventilation do not mix: an investigation of theatre ventilation, patient warming and joint replacement infection in orthopaedics. J Bone Joint Surg Br. 2011;93(11):1537-1544.

77. Legg AJ, Cannon T, Hamer AJ. Do forced air patient-warming devices disrupt unidirectional downward airflow? J Bone Joint Surg Br. 2012;94(2):254-256.

78. Sessler DI, Olmsted RN, Kuelpmann R. Forced-air warming does not worsen air quality in laminar flow operating rooms. Anesth Analg. 2011;113(6):1416-1421.

79. Memarzadeh F. Active warming systems to maintain perioperative normothermia in hip replacement surgery. J Hosp Infect. 2010;75(4):332-333.

80. Moretti B, Larocca AM, Napoli C, et al. Active warming systems to maintain perioperative normothermia in hip replacement surgery: a therapeutic aid or a vector of infection? J Hosp Infect. 2009;73(1):58-63.

81. Tumia N, Ashcroft GP. Convection warmers--a possible source of contamination in laminar airflow operating theatres? J Hosp Infect. 2002;52(3):171-174.

82. Sharp RJ, Chesworth T, Fern ED. Do warming blankets increase bacterial counts in the operating field in a laminar-flow theatre? J Bone Joint Surg Br. 2002;84(4):486-488.

83. Zink RS, Iaizzo PA. Convective warming therapy does not increase the risk of wound contamination in the operating room. Anesth Analg. 1993;76(1):50-53.

84. Albrecht M, Gauthier RL, Belani K, Litchy M, Leaper D. Forced-air warming blowers: An evaluation of filtration adequacy and airborne contamination emissions in the operating room. Am J Infect Control. 2011;39(4):321-328.

85. World Health Organization. Clean care is safer care. Available at: <http://who.int/gpsc/5may/background/5moments/en>. Accessed July 30, 2013.

86. Pittet D, Allegranzi B, Sax H, et al. Evidence-based model for hand transmission during patient care and the role of improved practices. Lancet Infect Dis. 2006;6(10):641-652.

87. Chou DT, Achan P, Ramachandran M. The World Health Organization '5 moments of hand hygiene': the scientific foundation. J Bone Joint Surg Br. 2012;94(4):441-445.

88. Larson EL, Hughes CA, Pyrek JD, Sparks SM, Cagatay EU, Bartkus JM. Changes in bacterial flora associated with skin damage on hands of health care personnel. Am J Infect Control. 1998;26(5):513-521.

89. Noble WC. Dispersal of skin microorganisms. Br J Dermatol. 1975;93(4):477-485.

90. Bonten MJ, Hayden MK, Nathan C, et al. Epidemiology of colonisation of patients and environment with vancomycin-resistant enterococci. Lancet. 1996;348(9042):1615-1619.

91. Boyce JM, Potter-Bynoe G, Chenevert C, King T. Environmental contamination due to methicillin-resistant Staphylococcus aureus: possible infection control implications. Infect Control Hosp Epidemiol. 1997;18(9):622-627.

92. Hayden MK, Blom DW, Lyle EA, Moore CG, Weinstein RA. Risk of hand or glove contamination after contact with patients colonized with vancomycin-resistant enterococcus or the colonized patients' environment. Infect Control Hosp Epidemiol. 2008;29(2):149-154.

93. Bhalla A, Pultz NJ, Gries DM, et al. Acquisition of nosocomial pathogens on hands after contact with environmental surfaces near hospitalized patients. Infect Control Hosp Epidemiol. 2004;25(2):164-167.

94. Boyce JM, Opal SM, Chow JW, et al. Outbreak of multidrug-resistant Enterococcus faecium with transferable vanB class vancomycin resistance. J Clin Microbiol. 1994;32(5):1148-1153.

95. McFarland LV, Mulligan ME, Kwok RY, Stamm WE. Nosocomial acquisition of Clostridium difficile infection. N Engl J Med. Jan 26 1989;320(4):204-210.

96. Hilburn J, Hammond BS, Fendler EJ, Groziak PA. Use of alcohol hand sanitizer as an infection control strategy in an acute care facility. Am J Infect Control. 2003;31(2):109-116.

97. Centers for Disease Control and Prevention. 2007 Guideline for isolation precautions: preventing transmission of infectious agents in healthcare settings. Available at: <http://www.cdc.gov/hicpac/2007ip/2007ip_table4.html>. Accessed July 30, 2013.

98. Lucet JC, Rigaud MP, Mentre F, et al. Hand contamination before and after different hand hygiene techniques: a randomized clinical trial. J Hosp Infect. 2002;50(4):276-280.

99. McBryde ES, Bradley LC, Whitby M, McElwain DL. An investigation of contact transmission of methicillin-resistant Staphylococcus aureus. J Hosp Infect. 2004;58(2):104-108.

100. Carter AH, Casper DS, Parvizi J, Austin MS. A prospective analysis of glove perforation in primary and revision total hip and total knee arthroplasty. J Arthroplasty. 2012;27(7):1271-1275.

101. Demircay E, Unay K, Bilgili MG, Alataca G. Glove perforation in hip and knee arthroplasty. J Orthop Sci. 2010;15(6):790-794.

102. Hester RA, Nelson CL, Harrison S. Control of contamination of the operative team in total joint arthroplasty. J Arthroplasty. 1992;7(3):267-269.

103. Sebold EJ, Jordan LR. Intraoperative glove perforation. A comparative analysis. Clin Orthop Relat Res. 1993;(297):242-244.

104. Sutton PM, Greene T, Howell FR. The protective effect of a cut-resistant glove liner. A prospective, randomised trial. J Bone Joint Surg Br. 1998;80(3):411-413.

105. Al-Maiyah M, Bajwa A, Mackenney P, et al. Glove perforation and contamination in primary total hip arthroplasty. J Bone Joint Surg Br. 2005;87(4):556-559.

106. Kaya I, Ugras A, Sungur I, Yilmaz M, Korkmaz M, Cetinus E. Glove perforation time and frequency in total hip arthroplasty procedures. Acta Orthop Traumatol Turc. 2012;46(1):57-60.

107. Dawson-Bowling S, Smith J, Butt D, Cottam H, Umasankar S, Armitage A. Should outer surgical gloves be changed intraoperatively before orthopaedic prosthesis implantation? J Hosp Infect. 2011;78(2):156-157.

108. Beldame J, Lagrave B, Lievain L, Lefebvre B, Frebourg N, Dujardin F. Surgical glove bacterial contamination and perforation during total hip arthroplasty implantation: when gloves should be changed. Orthop Traumatol Surg Res. 2012;98(4):432-440.

109. Dalstrom DJ, Venkatarayappa I, Manternach AL, Palcic MS, Heyse BA, Prayson MJ. Time-dependent contamination of opened sterile operating-room trays. J Bone Joint Surg Am. 2008;90(5):1022-1025.

110. Brown AR, Taylor GJ, Gregg PJ. Air contamination during skin preparation and draping in joint replacement surgery. J Bone Joint Surg Br. 1996;78(1):92-94.

111. Chosky SA, Modha D, Taylor GJ. Optimisation of ultraclean air. The role of instrument preparation. J Bone Joint Surg Br. 1996;78(5):835-837.

112. Recommended practices for maintaining a sterile field. AORN J. 2006;83(2):402-404, 407-410, 413-406.

113. Fairclough JA, Mackie IG, Mintowt-Czyz W, Phillips GE. The contaminated skin-knife. A surgical myth. J Bone Joint Surg Br. 1983;65(2):210.

114. Grabe N, Falstie-Jensen S, Fredberg U, Schroder H, Sorensen I. The contaminated skin-knife--fact or fiction. J Hosp Infect. 1985;6(3):252-256.

115. Ritter MA, French ML, Eitzen HE. Bacterial contamination of the surgical knife. Clin Orthop Relat Res. 1975;(108):158-160.

116. Schindler OS, Spencer RF, Smith MD. Should we use a separate knife for the skin? J Bone Joint Surg Br. 2006;88(3):382-385.

117. Givissis P, Karataglis D, Antonarakos P, Symeonidis PD, Christodoulou A. Suction during orthopaedic surgery. How safe is the suction tip? Acta Orthop Belg. 2008;74(4):531-533.

118. Greenough CG. An investigation into contamination of operative suction. J Bone Joint Surg Br. 1986;68(1):151-153.

119. Insull PJ, Hudson J. Suction tip: a potential source of infection in clean orthopaedic procedures. ANZ J Surg. 2012;82(3):185-186.

120. Meals RA, Knoke L. The surgical suction top--a contaminated instrument. J Bone Joint Surg Am. 1978;60(3):409-410.

121. Mulcahy DM, McCormack D, McElwain JP. Intraoperative suction catheter tip contamination. J R Coll Surg Edinb. 1994;39(6):371-373.

122. Robinson AH, Drew S, Anderson J, Bentley G, Ridgway GL. Suction tip contamination in the ultraclean-air operating theatre. Ann R Coll Surg Engl. 1993;75(4):254-256.

123. Strange-Vognsen HH, Klareskov B. Bacteriologic contamination of suction tips during hip arthroplasty. Acta Orthop Scand. 1988;59(4):410-411.

124. Baird RA, Nickel FR, Thrupp LD, Rucker S, Hawkins B. Splash basin contamination in orthopaedic surgery. Clin Orthop Relat Res. 1984;(187):129-133.

125. Anto B, McCabe J, Kelly S, Morris S, Rynn L, Corbett-Feeney G. Splash basin bacterial contamination during elective arthroplasty. J Infect. 2006;52(3):231-232.

126. Glait SA, Schwarzkopf R, Gould S, Bosco J, Slover J. Is repetitive intraoperative splash basin use a source of bacterial contamination in total joint replacement? Orthopedics. 2011;34(9):e546-549.

127. Mont MA, Johnson AJ, Issa K, et al. Single-Use Instrumentation, Cutting Blocks, and Trials Decrease Contamination during Total Knee Arthroplasty: A Prospective Comparison of Navigated and Nonnavigated Cases. J Knee Surg. 2013;26(4):285-290.

128. Barrack RL, Ruh EL, Williams BM, Ford AD, Foreman K, Nunley RM. Patient specific cutting blocks are currently of no proven value. J Bone Joint Surg Br. 2012;94(11 Suppl A):95-99.

129. Gilliam DL, Nelson CL. Comparison of a one-step iodophor skin preparation versus traditional preparation in total joint surgery. Clin Orthop Relat Res. 1990;(250):258-260.

130. Jacobson C, Osmon DR, Hanssen A, et al. Prevention of wound contamination using DuraPrep solution plus Ioban 2 drapes. Clin Orthop Relat Res. 2005;(439):32-37.

131. Johnston DH, Fairclough JA, Brown EM, Morris R. Rate of bacterial recolonization of the skin after preparation: four methods compared. Br J Surg. 1987;74(1):64.

132. Kuhme T, Isaksson B, Dahlin LG. Wound contamination in cardiac surgery. A systematic quantitative and qualitative study of the bacterial growth in sternal wounds in cardiac surgery patients. APMIS. 2007;115(9):1001-1007.

133. Lewis DA, Leaper DJ, Speller DC. Prevention of bacterial colonization of wounds at operation: comparison of iodine-impregnated ('Ioban') drapes with conventional methods. J Hosp Infect. 1984;5(4):431-437.

134. Bady S, Wongworawat MD. Effectiveness of antimicrobial incise drapes versus cyanoacrylate barrier preparations for surgical sites. Clin Orthop Relat Res. 2009;467(7):1674-1677.

135. Falk-Brynhildsen K, Friberg O, Soderquist B, Nilsson UG. Bacterial colonization of the skin following aseptic preoperative preparation and impact of the use of plastic adhesive drapes. Biol Res Nurs. 2013;15(2):242-248.

136. French ML, Eitzen HE, Ritter MA. The plastic surgical adhesive drape: an evaluation of its efficacy as a microbial barrier. Ann Surg. 1976;184(1):46-50.

137. Chiu KY, Lau SK, Fung B, Ng KH, Chow SP. Plastic adhesive drapes and wound infection after hip fracture surgery. Aust N Z J Surg. Oct 1993;63(10):798-801.

138. Dewan PA, Van Rij AM, Robinson RG, Skeggs GB, Fergus M. The use of an iodophor-impregnated plastic incise drape in abdominal surgery--a controlled clinical trial. Aust N Z J Surg. 1987;57(11):859-863.

139. Fairclough JA, Johnson D, Mackie I. The prevention of wound contamination by skin organisms by the pre-operative application of an iodophor impregnated plastic adhesive drape. J Int Med Res. 1986;14(2):105-109.

140. Webster J, Alghamdi A. Use of plastic adhesive drapes during surgery for preventing surgical site infection. Cochrane Database Syst Rev. 2013;1:CD006353.

141. Grove GL, Eyberg CI. Comparison of two preoperative skin antiseptic preparations and resultant surgical incise drape adhesion to skin in healthy volunteers. J Bone Joint Surg Am. 2012;94(13):1187-1192.

142. Alexander JW, Aerni S, Plettner JP. Development of a safe and effective one-minute preoperative skin preparation. Arch Surg. Dec 1985;120(12):1357-1361.

143. Erdmann S, Hertl M, Merk HF. Allergic contact dermatitis from povidone-iodine. Contact Dermatitis. 1999;40(6):331-332.

144. Zokaie S, White IR, McFadden JD. Allergic contact dermatitis caused by iodophor-impregnated surgical incise drape. Contact Dermatitis. 2011;65(5):309.

145. Gheorghe A, Calvert M, Pinkney TD, et al. Systematic review of the clinical effectiveness of wound-edge protection devices in reducing surgical site infection in patients undergoing open abdominal surgery. Ann Surg. 2012;255(6):1017-1029.

146. Edwards JP, Ho AL, Tee MC, Dixon E, Ball CG. Wound protectors reduce surgical site infection: a meta-analysis of randomized controlled trials. Ann Surg. 2012;256(1):53-59.

147. Mihaljevic AL, Michalski CW, Erkan M, et al. Standard abdominal wound edge protection with surgical dressings vs coverage with a sterile circular polyethylene drape for prevention of surgical site infections (BaFO): study protocol for a randomized controlled trial. Trials. 2012;13:57.

148. Pinkney TD, Bartlett DC, Hawkins W, et al. Reduction of surgical site infection using a novel intervention (ROSSINI): study protocol for a randomised controlled trial. Trials. 2011;12:217.

149. Blom AW, Gozzard C, Heal J, Bowker K, Estela CM. Bacterial strike-through of re-usable surgical drapes: the effect of different wetting agents. J Hosp Infect. 2002;52(1):52-55.

150. Laufman H, Siegal JD, Edberg SC. Moist bacterial strike-through of surgical materials: confirmatory tests. Ann Surg. 1979;189(1):68-74.

151. Blom A, Estela C, Bowker K, MacGowan A, Hardy JR. The passage of bacteria through surgical drapes. Ann R Coll Surg Engl. 2000;82(6):405-407.

152. Ha'eri GB, Wiley AM. Wound contamination through drapes and gowns: a study using tracer particles. Clin Orthop Relat Res. 1981;(154):181-184.

153. Mackintosh CA, Lidwell OM. The evaluation of fabrics in relation to their use as protective garments in nursing and surgery. III. Wet penetration and contact transfer of particles through clothing. J Hyg (Lond). Dec 1980;85(3):393-403.

154. Blom AW, Barnett A, Ajitsaria P, Noel A, Estela CM. Resistance of disposable drapes to bacterial penetration. J Orthop Surg (Hong Kong). 2007;15(3):267-269.

155. Bellchambers J, Harris JM, Cullinan P, Gaya H, Pepper JR. A prospective study of wound infection in coronary artery surgery. Eur J Cardiothorac Surg. 1999;15(1):45-50.

156. Garibaldi RA, Maglio S, Lerer T, Becker D, Lyons R. Comparison of nonwoven and woven gown and drape fabric to prevent intraoperative wound contamination and postoperative infection. Am J Surg. 1986;152(5):505-509.

157. Anglen JO, Gainor BJ, Simpson WA, Christensen G. The use of detergent irrigation for musculoskeletal wounds. Int Orthop. 2003;27(1):40-46.

158. Niki Y, Matsumoto H, Otani T, Tomatsu T, Toyama Y. How much sterile saline should be used for efficient lavage during total knee arthroplasty? Effects of pulse lavage irrigation on removal of bone and cement debris. J Arthroplasty. 2007;22(1):95-99.

159. Bhandari M, Schemitsch EH, Adili A, Lachowski RJ, Shaughnessy SG. High and low pressure pulsatile lavage of contaminated tibial fractures: an in vitro study of bacterial adherence and bone damage. J Orthop Trauma. 1999;13(8):526-533.

160. Brown LL, Shelton HT, Bornside GH, Cohn I Jr. Evaluation of wound irrigation by pulsatile jet and conventional methods. Ann Surg. 1978;187(2):170-173.

161. Gross A, Cutright DE, Bhaskar SN. Effectiveness of pulsating water jet lavage in treatment of contaminated crushed wounds. Am J Surg. 1972;124(3):373-377.

162. Kalteis T, Lehn N, Schroder HJ, et al. Contaminant seeding in bone by different irrigation methods: an experimental study. J Orthop Trauma. 2005;19(9):591-596.

163. Moussa FW, Gainor BJ, Anglen JO, Christensen G, Simpson WA. Disinfecting agents for removing adherent bacteria from orthopaedic hardware. Clin Orthop Relat Res. 1996;(329):255-262.

164. Rodeheaver GT, Pettry D, Thacker JG, Edgerton MT, Edlich RF. Wound cleansing by high pressure irrigation. Surg Gynecol Obstet. 1975;141(3):357-362.

165. Bratzler DW, Dellinger EP, Olsen KM, et al. Clinical practice guidelines for antimicrobial prophylaxis in surgery. Am J Health Syst Pharm. 2013;70(3):195-283.

166. Cervantes-Sanchez CR, Gutierrez-Vega R, Vazquez-Carpizo JA, Clark P, Athie-Gutierrez C. Syringe pressure irrigation of subdermic tissue after appendectomy to decrease the incidence of postoperative wound infection. World J Surg. 2000;24(1):38-41; discussion 41-32.

167. Eklund AE, Tunevall TG. Prevention of postoperative wound infection after appendectomy by local application of tinidazole: a double-blind study. World J Surg. 1987;11(2):263-266.

168. Hassinger SM, Harding G, Wongworawat MD. High-pressure pulsatile lavage propagates bacteria into soft tissue. Clin Orthop Relat Res. 2005;(439):27-31.

169. Ackland DC, Yap V, Ackland ML, Williams JF, Hardidge A, de Steiger R. Pulse-lavage brushing followed by hydrogen peroxide-gauze packing for bone-bed preparation in cemented total hip arthroplasty: a bovine model. J Orthop Surg (Hong Kong). 2009;17(3):296-300.

170. Clarius M, Seeger JB, Jaeger S, Mohr G, Bitsch RG. The importance of pulsed lavage on interface temperature and ligament tension force in cemented unicompartmental knee arthroplasty. Clin Biomech (Bristol, Avon). 2012;27(4):372-376.

171. Kalteis T, Pforringer D, Herold T, Handel M, Renkawitz T, Plitz W. An experimental comparison of different devices for pulsatile high-pressure lavage and their relevance to cement intrusion into cancellous bone. Arch Orthop Trauma Surg. 2007;127(10):873-877.

172. Maistrelli GL, Antonelli L, Fornasier V, Mahomed N. Cement penetration with pulsed lavage versus syringe irrigation in total knee arthroplasty. Clin Orthop Relat Res. 1995;(312):261-265.

173. Miskovsky C, Whiteside LA, White SE. The cemented unicondylar knee arthroplasty. An in vitro comparison of three cement techniques. Clin Orthop Relat Res. 1992;(284):215-220.

174. Seeger JB, Jaeger S, Bitsch RG, Mohr G, Rohner E, Clarius M. The effect of bone lavage on femoral cement penetration and interface temperature during Oxford unicompartmental knee arthroplasty with cement. J Bone Joint Surg Am. Jan 2 2013;95(1):48-53.

175. Clarius M, Hauck C, Seeger JB, James A, Murray DW, Aldinger PR. Pulsed lavage reduces the incidence of radiolucent lines under the tibial tray of Oxford unicompartmental knee arthroplasty: pulsed lavage versus syringe lavage. Int Orthop. 2009;33(6):1585-1590.

176. Polzin B, Ellis T, Dirschl DR. Effects of varying pulsatile lavage pressure on cancellous bone structure and fracture healing. J Orthop Trauma. 2006;20(4):261-266.

177. Dirschl DR, Duff GP, Dahners LE, Edin M, Rahn BA, Miclau T. High pressure pulsatile lavage irrigation of intraarticular fractures: effects on fracture healing. J Orthop Trauma. Sep-Oct 1998;12(7):460-463.

178. Draeger RW, Dahners LE. Traumatic wound debridement: a comparison of irrigation methods. J Orthop Trauma. 2006;20(2):83-88.

179. Bhandari M, Adili A, Lachowski RJ. High pressure pulsatile lavage of contaminated human tibiae: an in vitro study. J Orthop Trauma. 1998;12(7):479-484.

180. Svoboda SJ, Bice TG, Gooden HA, Brooks DE, Thomas DB, Wenke JC. Comparison of bulb syringe and pulsed lavage irrigation with use of a bioluminescent musculoskeletal wound model. J Bone Joint Surg Am. 2006;88(10):2167-2174.

181. Hargrove R, Ridgeway S, Russell R, Norris M, Packham I, Levy B. Does pulse lavage reduce hip hemiarthroplasty infection rates? J Hosp Infect. 2006;62(4):446-449.

182. Munoz-Mahamud E, Garcia S, Bori G, et al. Comparison of a low-pressure and a high-pressure pulsatile lavage during debridement for orthopaedic implant infection. Arch Orthop Trauma Surg. 2011;131(9):1233-1238.

183. Howell JM, Dhindsa HS, Stair TO, Edwards BA. Effect of scrubbing and irrigation on staphylococcal and streptococcal counts in contaminated lacerations. Antimicrob Agents Chemother. 1993;37(12):2754-2755.

184. McHugh SM, Collins CJ, Corrigan MA, Hill AD, Humphreys H. The role of topical antibiotics used as prophylaxis in surgical site infection prevention. J Antimicrob Chemother. 2011;66(4):693-701.

185. Farnell MB, Worthington-Self S, Mucha P Jr, Ilstrup DM, McIlrath DC. Closure of abdominal incisions with subcutaneous catheters. A prospective randomized trial. Arch Surg. 1986;121(6):641-648.

186. Greig J, Morran C, Gunn R, Mason B, Sleigh D, McArdle C. Wound sepsis after colorectal surgery: the effect of cefotetan lavage. Chemioterapia. 1987;6(2 Suppl):595-596.

187. Rambo WM. Irrigation of the peritoneal cavity with cephalothin. Am J Surg. 1972;123(2):192-195.

188. Schein M, Gecelter G, Freinkel W, Gerding H, Becker PJ. Peritoneal lavage in abdominal sepsis. A controlled clinical study. Arch Surg. 1990;125(9):1132-1135.

189. Sherman JO, Luck SR, Borger JA. Irrigation of the peritoneal cavity for appendicitis in children: a double-blind study. J Pediatr Surg. 1976;11(3):371-374.

190. Conroy BP, Anglen JO, Simpson WA, et al. Comparison of castile soap, benzalkonium chloride, and bacitracin as irrigation solutions for complex contaminated orthopaedic wounds. J Orthop Trauma. 1999;13(5):332-337.

191. Anglen J, Apostoles PS, Christensen G, Gainor B, Lane J. Removal of surface bacteria by irrigation. J Orthop Res. 1996;14(2):251-254.

192. Anglen JO, Apostoles S, Christensen G, Gainor B. The efficacy of various irrigation solutions in removing slime-producing Staphylococcus. J Orthop Trauma. 1994;8(5):390-396.

193. Anglen JO. Comparison of soap and antibiotic solutions for irrigation of lower-limb open fracture wounds. A prospective, randomized study. J Bone Joint Surg Am. 2005;87(7):1415-1422.

194. Sindelar WF, Mason GR. Irrigation of subcutaneous tissue with povidone-iodine solution for prevention of surgical wound infections. Surg Gynecol Obstet. 1979;148(2):227-231.

195. Brown NM, Cipriano CA, Moric M, Sporer SM, Della Valle CJ. Dilute betadine lavage before closure for the prevention of acute postoperative deep periprosthetic joint infection. J Arthroplasty. 2012;27(1):27-30.

196. Cheng MT, Chang MC, Wang ST, Yu WK, Liu CL, Chen TH. Efficacy of dilute betadine solution irrigation in the prevention of postoperative infection of spinal surgery. Spine (Phila Pa 1976). 2005;30(15):1689-1693.

197. Chundamala J, Wright JG. The efficacy and risks of using povidone-iodine irrigation to prevent surgical site infection: an evidence-based review. Can J Surg. 2007;50(6):473-481.

198. Kataoka M, Tsumura H, Kaku N, Torisu T. Toxic effects of povidone-iodine on synovial cell and articular cartilage. Clin Rheumatol. 2006;25(5):632-638.

199. Schaumburger J, Beckmann J, Springorum HR, et al. [Toxicity of antiseptics on chondrocytes in vitro]. Z Orthop Unfall. 2010;148(1):39-43.

200. Kaysinger KK, Nicholson NC, Ramp WK, Kellam JF. Toxic effects of wound irrigation solutions on cultured tibiae and osteoblasts. J Orthop Trauma. 1995;9(4):303-311.

201. Goldenheim PD. An appraisal of povidone-iodine and wound healing. Postgrad Med J. 1993;69(Suppl 3):S97-105.

202. Berkelman RL, Lewin S, Allen JR, et al. Pseudobacteremia attributed to contamination of povidone-iodine with Pseudomonas cepacia. Ann Intern Med. 1981;95(1):32-36.

203. Panlilio AL, Beck-Sague CM, Siegel JD, et al. Infections and pseudoinfections due to povidone-iodine solution contaminated with Pseudomonas cepacia. Clin Infect Dis. 1992;14(5):1078-1083.

204. Howells RJ, Salmon JM, McCullough KG. The effect of irrigating solutions on the strength of the cement-bone interface. Aust N Z J Surg. 1992;62(3):215-218.

205. Dimick JB, Lipsett PA, Kostuik JP. Spine update: antimicrobial prophylaxis in spine surgery: basic principles and recent advances. Spine (Phila Pa 1976). 2000;25(19):2544-2548.

206. Lipsky BA, Hoey C. Topical antimicrobial therapy for treating chronic wounds. Clin Infect Dis. 2009;49(10):1541-1549.

207. Antevil JL, Muldoon MP, Battaglia M, Green R. Intraoperative anaphylactic shock associated with bacitracin irrigation during revision total knee arthroplasty. A case report. J Bone Joint Surg Am. 2003;85-A(2):339-342.

208. Dirschl DR, Wilson FC. Topical antibiotic irrigation in the prophylaxis of operative wound infections in orthopedic surgery. Orthop Clin North Am. 1991;22(3):419-426.

209. Gelman ML, Frazier CH, Chandler HP. Acute renal failure after total hip replacement. J Bone Joint Surg Am. 1979;61(5):657-660.

210. Savitz SI, Savitz MH, Goldstein HB, Mouracade CT, Malangone S. Topical irrigation with polymyxin and bacitracin for spinal surgery. Surg Neurol. 1998;50(3):208-212.

211. Petty W, Spanier S, Shuster JJ. Prevention of infection after total joint replacement. Experiments with a canine model. J Bone Joint Surg Am. 1988;70(4):536-539.

212. Everts PA, Devilee RJ, Brown Mahoney C, et al. Platelet gel and fibrin sealant reduce allogeneic blood transfusions in total knee arthroplasty. Acta Anaesthesiol Scand. 2006;50(5):593-599.

213. Levy O, Martinowitz U, Oran A, Tauber C, Horoszowski H. The use of fibrin tissue adhesive to reduce blood loss and the need for blood transfusion after total knee arthroplasty. A prospective, randomized, multicenter study. J Bone Joint Surg Am. 1999;81(11):1580-1588.

214. Wang GJ, Hungerford DS, Savory CG, et al. Use of fibrin sealant to reduce bloody drainage and hemoglobin loss after total knee arthroplasty: a brief note on a randomized prospective trial. J Bone Joint Surg Am. 2001;83-A(10):1503-1505.

215. Wang GJ, Goldthwaite CA Jr, Burks S, Crawford R, Spotnitz WD. Fibrin sealant reduces perioperative blood loss in total hip replacement. J Long Term Eff Med Implants. 2003;13(5):399-411.

216. Lassen MR, Solgaard S, Kjersgaard AG, et al. A pilot study of the effects of Vivostat patient-derived fibrin sealant in reducing blood loss in primary hip arthroplasty. Clin Appl Thromb Hemost. 2006;12(3):352-357.

217. Mawatari M, Higo T, Tsutsumi Y, Shigematsu M, Hotokebuchi T. Effectiveness of autologous fibrin tissue adhesive in reducing postoperative blood loss during total hip arthroplasty: a prospective randomised study of 100 cases. J Orthop Surg (Hong Kong). 2006;14(2):117-121.

218. Molloy DO, Archbold HA, Ogonda L, McConway J, Wilson RK, Beverland DE. Comparison of topical fibrin spray and tranexamic acid on blood loss after total knee replacement: a prospective, randomised controlled trial. J Bone Joint Surg Br. 2007;89(3):306-309.

219. Carless PA, Henry DA, Anthony DM. Fibrin sealant use for minimising peri-operative allogeneic blood transfusion. Cochrane Database Syst Rev. 2003(2):CD004171.

220. Eggers MD, Fang L, Lionberger DR. A comparison of wound closure techniques for total knee arthroplasty. J Arthroplasty. 2011;26(8):1251-1258 e1251-1254.

221. Khan RJ, Fick D, Yao F, et al. A comparison of three methods of wound closure following arthroplasty: a prospective, randomised, controlled trial. J Bone Joint Surg Br. 2006;88(2):238-242.

222. Livesey C, Wylde V, Descamps S, et al. Skin closure after total hip replacement: a randomised controlled trial of skin adhesive versus surgical staples. J Bone Joint Surg Br. 2009;91(6):725-729.

223. Coulthard P, Esposito M, Worthington HV, van der Elst M, van Waes OJ, Darcey J. Tissue adhesives for closure of surgical incisions. Cochrane Database Syst Rev. 2010(5):CD004287.

224. Smith TO, Sexton D, Mann C, Donell S. Sutures versus staples for skin closure in orthopaedic surgery: meta-analysis. BMJ. 2010;340:c1199.

225. Lingard L, Regehr G, Orser B, et al. Evaluation of a preoperative checklist and team briefing among surgeons, nurses, and anesthesiologists to reduce failures in communication. Arch Surg. 2008;143(1):12-17; discussion 18.

226. de Vries EN, Prins HA, Crolla RM, et al. Effect of a comprehensive surgical safety system on patient outcomes. N Engl J Med. 2010;363(20):1928-1937.

227. Lingard L, Regehr G, Cartmill C, et al. Evaluation of a preoperative team briefing: a new communication routine results in improved clinical practice. BMJ Qual Saf. 2011;20(6):475-482.

228. Rosenberg AD, Wambold D, Kraemer L, et al. Ensuring appropriate timing of antimicrobial prophylaxis. J Bone Joint Surg Am. 2008;90(2):226-232.

229. Haynes AB, Weiser TG, Berry WR, et al. A surgical safety checklist to reduce morbidity and mortality in a global population. N Engl J Med. 2009;360(5):491-499.

230. Andersson AE, Bergh I, Karlsson J, Eriksson BI, Nilsson K. The application of evidence-based measures to reduce surgical site infections during orthopedic surgery - report of a single-center experience in Sweden. Patient Saf Surg. 2012;6(1):11.

231. Burden AR, Torjman MC, Dy GE, et al. Prevention of central venous catheter-related bloodstream infections: is it time to add simulation training to the prevention bundle? J Clin Anesth. 2012;24(7):555-560.

232. Schulman J, Stricof R, Stevens TP, et al. Statewide NICU central-line-associated bloodstream infection rates decline after bundles and checklists. Pediatrics. 2011;127(3):436-444.

**Workgroup 5: Blood Conservation**

**Liaison:**

Mohammad R Rasouli MD

**Leaders:**

Luiz Sérgio Marcelino Gomes MD, PhD (International), Brian Parsley MD (US)

**Delegates:**

Wael Barsoum MD, Hari Bezwada MD, James Cashman MD, Julio Garcia MD, William Hamilton MD, Eric Hume MD, Rajesh Malhotra MD, Stavros Memtsoudis MD, PhD, Alvin Ong MD, Fabio Orozco MD, Douglas Padgett MD, Ricardo Reina MD, Marco Teloken MD, Emmanuel Thienpont MD, Jonathan H Waters MD

**Question 1: Is blood transfusion associated with an increased risk of surgical site infection (SSI)/periprosthetic joint infection (PJI)?**

**Consensus:** Yes. Allogeneic blood transfusions is associated with an increased risk of SSI/PJI. The role of autologous transfusion in the risk of SSI/PJI remains inconclusive.

**Delegate Vote:** Agree: 91%, Disagree: 5%, Abstain: 4% (Strong Consensus)

**Justification:** Based on the Centers for Disease Control and Prevention (CDC) guideline, perioperative allogeneic blood transfusion in arthroplasty increases the risk of SSI/PJI. The association between autologous blood transfusion and the risk of SSI/PJI is less clear.

According to high-quality evidence from two randomized controlled trials (RCTs) and four observational studies, there is an increased risk of SSI with any blood transfusion (allogeneic, autologous, and autologous plus allogeneic blood transfusion data combined) as compared to no transfusion. This is further supported by both a meta-analysis of six studies (n = 8493) (odds ratio [OR] = 1.56, 95% confidence interval [CI] = 1.18–2.06; p = 0.002) and a meta-analysis (n = 7484) of four observational studies (OR = 1.59, 95% CI = 1.15–2.18; p = 0.004).1

Data from a meta-analysis (n = 970) of two RCTs in hip arthroplasty suggest that autologous blood transfusion is not associated with an increased risk of SSI when compared to no blood transfusion (OR = 1.15, 95% CI = 0.43–3.13; p = 0.78).1

Low-quality evidence from a meta-analysis (n = 5737) of four observational studies indicates that allogeneic blood transfusion is associated with an increased risk of SSI (nonadjusted OR = 1.46, 95% CI = 1.09-1.95; p = 0.01).1

Evidence from a meta-analysis (n = 2592) of three observational studies shows that transfusion with allogeneic blood increases the risk of SSI as compared to transfusion with autologous blood (OR = 4.57, 95% CI = 2.39–8.73; p < 0.0001).1 The study by Innerhofer et al.2 demonstrated a clear increased risk for allogeneic blood over autogenous blood (high overall infection risk in this study). White cell depletion does not appear to affect the infection rate with autologous blood in hip surgery.3

Evidence from one RCT and two observational studies indicates no increased risk of SSI in patients who receive both autologous and allogeneic blood transfusions).1

**Question 2: What are the predictors of the need for allogeneic blood transfusion in patients undergoing surgery for TJA?**

**Consensus:** A lower preoperative hemoglobin level is the strongest predictor for the potential need for allogeneic transfusion after TJA. The use of general anesthesia, higher Charlson Comorbidity Index, female sex, and longer duration of surgery are predictors of the potential need for allogeneic blood transfusion in patients undergoing total joint arthroplasty (TJA).

**Delegate Vote:** Agree: 90%, Disagree: 4%, Abstain: 6% (Strong Consensus)

**Justification:** The above-mentioned factors have been described as predictors of allogeneic blood transfusion in patients undergoing primary TJA. However, in these studies various transfusion triggers have been utilized, with a lower transfusion rate seen when a lower predefined Hgb level is used (currently 7-8 g/dL). Currently the most optimal hemoglobin threshold for transfusion remains unknown. The only prospective randomized controlled trial in orthopaedics is the FOCUS trial,4 which found no outcome differences with transfusing above or below 8 g/dL. The results of this trial were similar to those found in the TRICC trial.5 There are also many studies emphasizing the effect of operative time on perioperative blood loss and transfusion rate.6-17

In a single-institute study of 11,373 TJAs, including 4769 total knee arthroplasties (TKAs) and 6604 total hip arthroplasties (THAs), multivariate analysis indicated that male sex (263.59 mL and 233.60 mL in hips and knees), Charlson Comorbidity Index of > 3 (293.99 mL and 167.96 mL in hips and knees, respectively), and preoperative autologous blood donation (593.51 mL in hips and 592.30 in knees) increase the amount of blood loss.18 Regional anesthesia compared to general anesthesia reduced the amount of blood loss. Amount of blood loss in both THA (OR = 1.43, 95% CI = 1.40-1.46) and TKA (OR = 1.47, 95% CI = 1.42-1.51) and Charlson Comorbidity Index only in TKA patients (OR = 3.2, 95% CI = 1.99-5.15) increased risk of allogeneic blood transfusion. Preoperative autologous blood donation (OR = 0.01, 95% CI = 0.01-0.02 in hips and OR = 0.02, 95% CI = 0.01-0.03 in knees) decreased the risk of allogeneic blood transfusion.

In a study by Faris et al.19 the predictive power of seven preoperative variables (hemoglobin concentration, age, erythropoietin level, ferritin concentration, serum iron, total iron-binding capacity, and predicted blood volume) on the risk of transfusion in orthopaedic patients was tested in 276 surgical cases. The authors found that baseline hemoglobin concentration and predicted blood volume were significant predicators of transfusion risk. They also found an inverse correlation between hemoglobin concentration and transfusion risk. Placebo-treated patients with hemoglobin > 10 to ≤ 13 g/dL had an approximately two times greater risk of transfusion than patients with hemoglobin > 13 g/dL.

The study by Prazoo et al.20 also confirmed that the preoperative hemoglobin level was a strong predictor of need for blood transfusion following TJA. They assessed the association between preoperative autologous blood donation and risk of transfusion in 600 TJA patients, including 312 THAs and 288 TKAs. The authors suggested that a preoperative autologous donation may not be necessary. Their data also suggested that the use of a cell salvage system may be effective in reducing the blood transfusion rate.

The study by Hamaji et al. indicated that preoperative fluid loading can reduce the transfusion requirement and possibly infection rate; however, it was a small study with a high infection rate.21 Colloid may be preferable over crystalloid22 and neither method has a significant effect on clotting in vitro.23

**Question 3A: What is the role of the type of anesthesia in minimizing blood loss and allogeneic blood transfusion during arthroplasty surgery for PJI?**
[truncated: 485,144 more chars]
